# Supplementary material
Source: publisher site journal article supplement (https://www.degruyterbrill.com/publication/isbn/9783110343830/downloadAsset/9783110343830_List-of-Figures-and-Tables.pdf)
Supplement: Supplementary file 1 [file 9783110343830_List-of-Figures-and-Tables.pdf]

# **Simulation technischer linearer und nichtlinearer Systeme mit MATLAB®/Simulink®**

Josef Hoffmann / Franz Quint

ISBN: 978-3-11-034382-3

© 2014 Oldenbourg Wissenschaftsverlag GmbH

## **Abbildungsübersicht / List of Figures**

## **Tabellenübersicht / List of Tables**

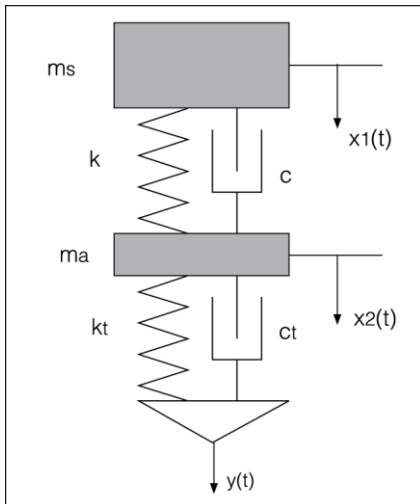

**Abb. 1.1:** Einfaches Modell einer Radaufhängung

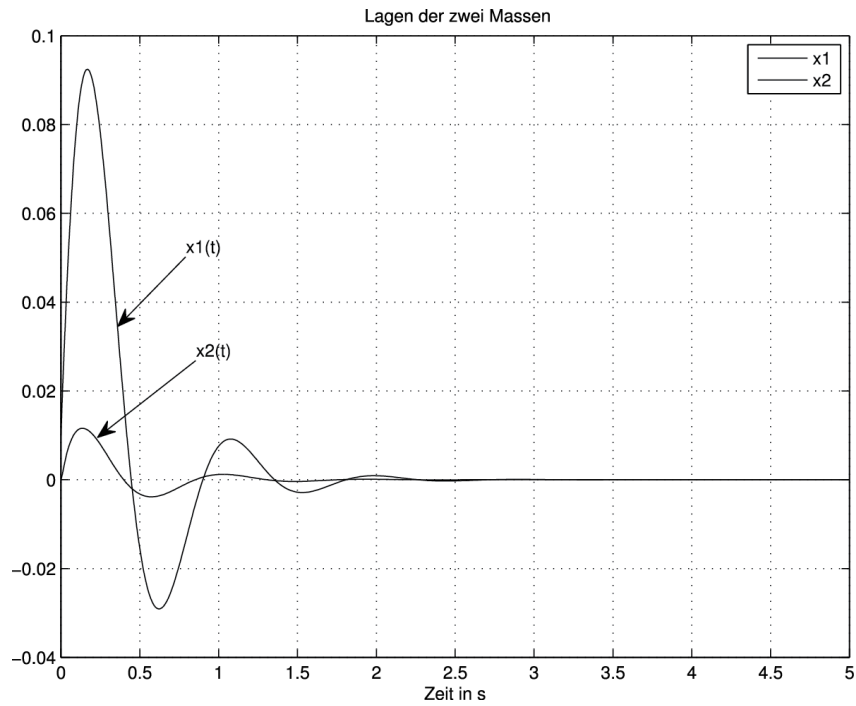

**Abb. 1.2:** Lagekoordinaten der Massen in der homogenen Lösung (rad\_aufhaeng\_1.m)

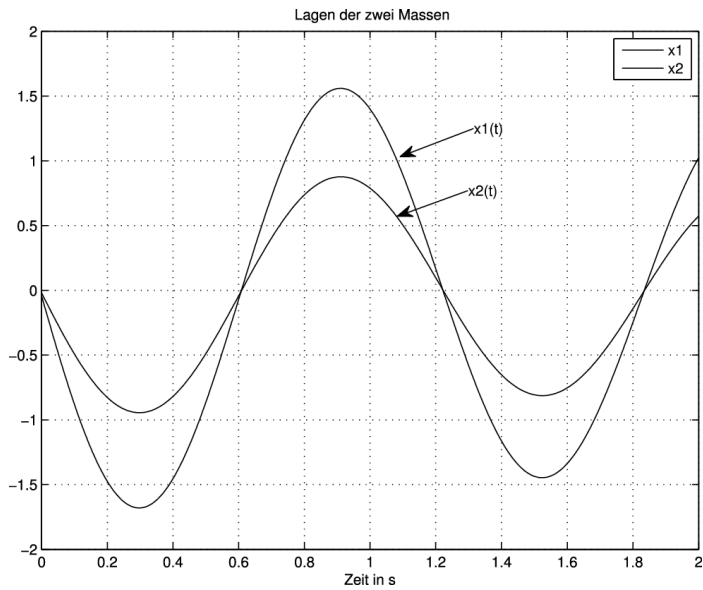

**Abb. 1.3:** Lagekoordinaten der Massen für die kleinere Eigenfrequenz (rad\_aufhaeng\_2.m)



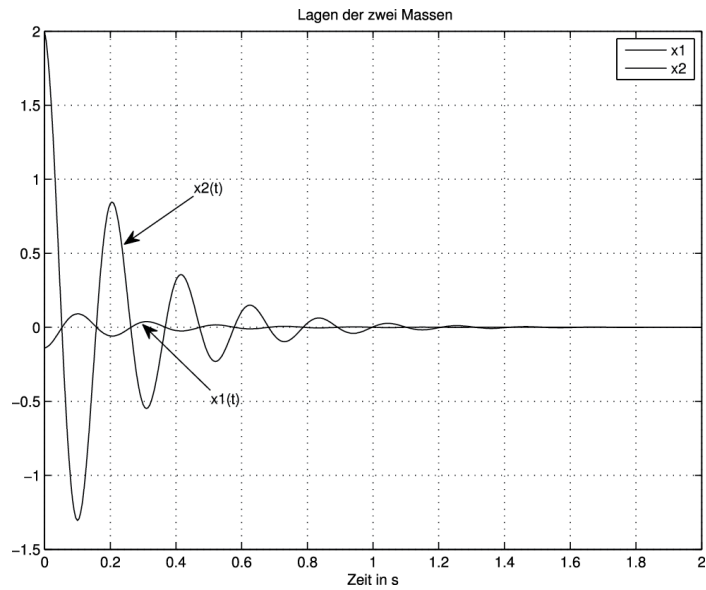

**Abb. 1.4:** Lagekoordinate der Massen für die größere Eigenfrequenz (rad\_aufhaeng\_2.m)

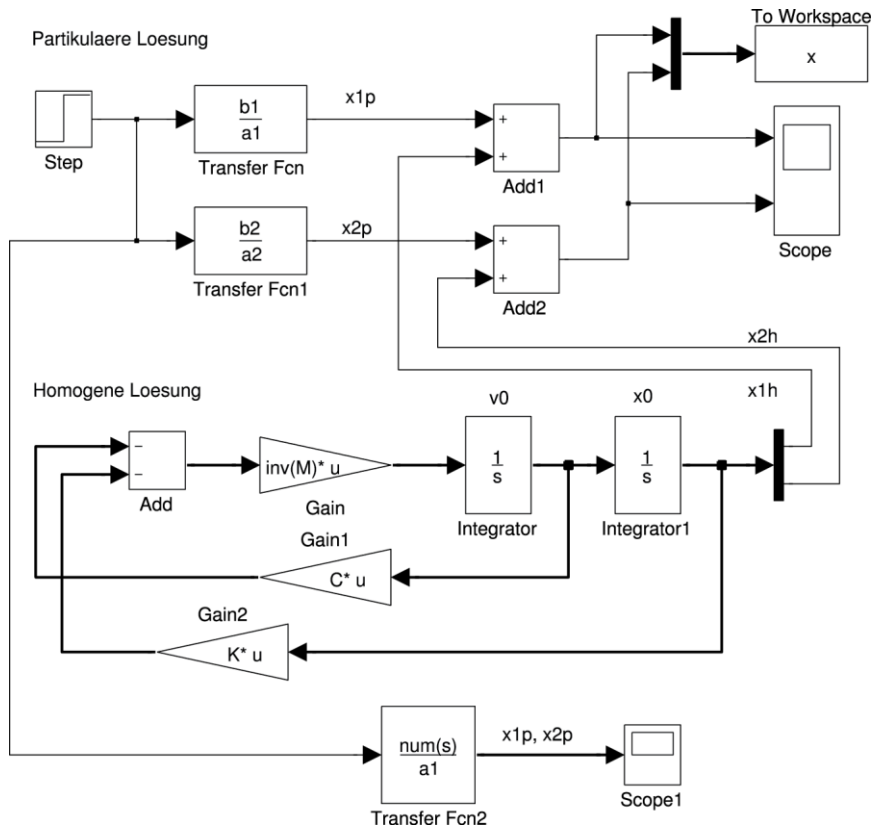

**Abb. 1.5:** Simulink-Modell zur Bestimmung der allgemeinen Lösung (rad\_aufhaeng\_3.m, rad\_aufhaeng3.mdl)

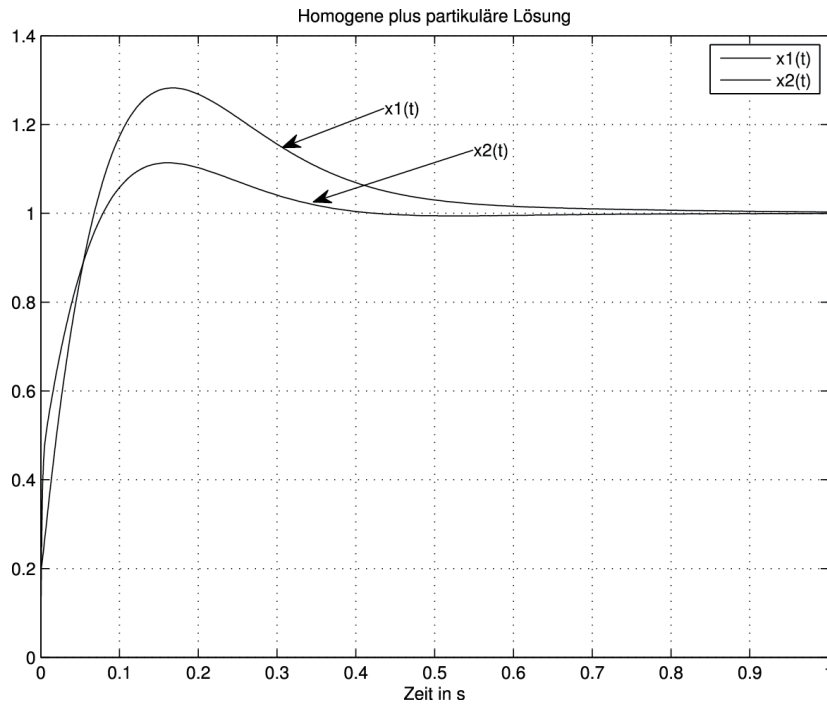

**Abb. 1.6:** Allgemeine Lösungen für die Lagekoordinaten der Massen (rad\_aufhaeng\_3.m, rad\_aufhaeng3.mdl)

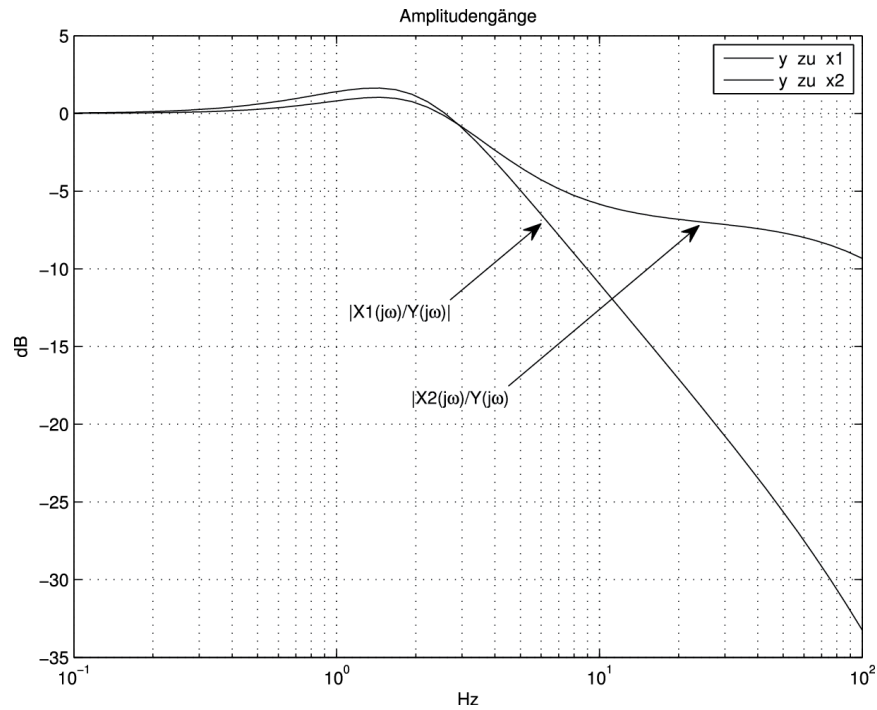

**Abb. 1.7:** Amplitudengänge der Übertragungsfunktionen (rad\_aufhaeng\_3.m, rad\_aufhaeng3.mdl)

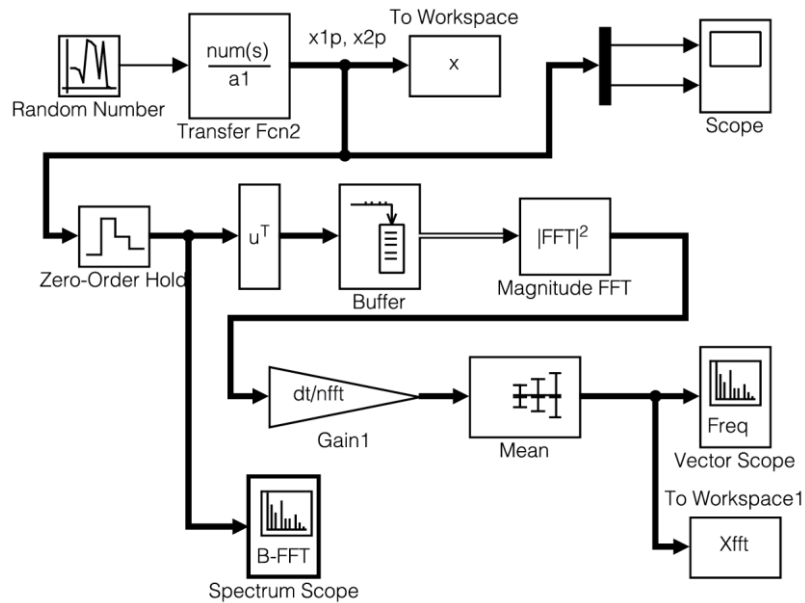

**Abb. 1.8:** Simulink-Modell der Untersuchung mit Zufallsanregung (rad\_aufhaeng\_4.m, rad\_aufhaeng4.mdl)

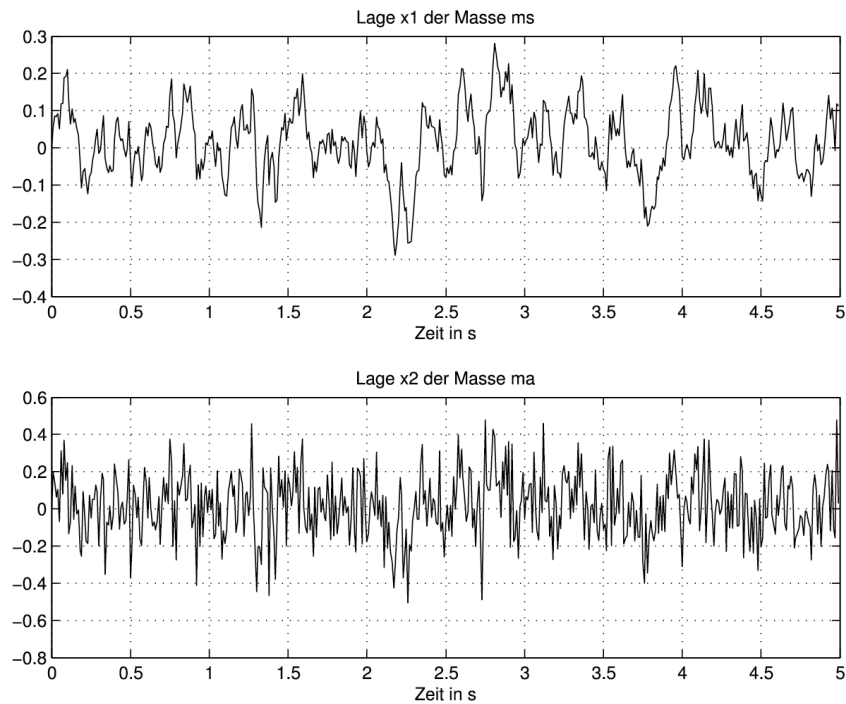

**Abb. 1.9:** Lagekoordinaten  $x_1(t)$  und  $x_2(t)$  der Massen für zufälliger Anregung mit unkorrelierter Sequenz (rad\_aufhaeng\_4.m, rad\_aufhaeng4.mdl)

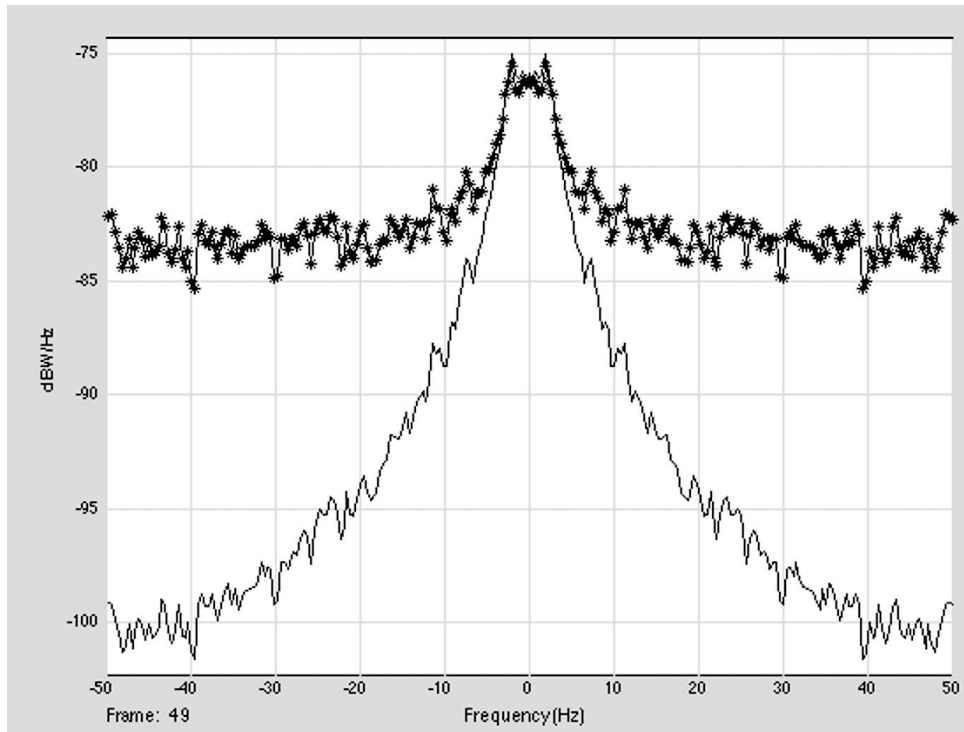

**Abb. 1.10:** Spektrale Leistungsdichten vom Spectrum-Scope (rad\_aufhaeng\_4.m, rad\_aufhaeng4.mdl)

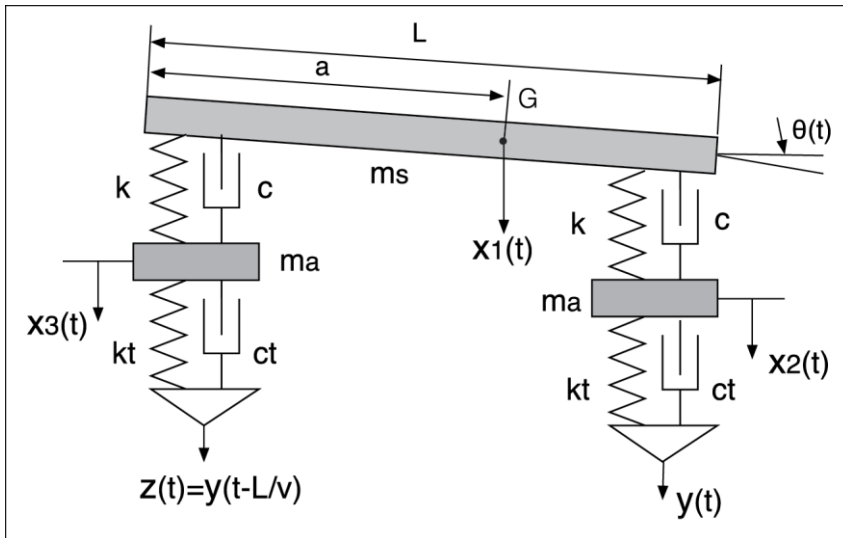

**Abb. 1.11:** Radaufhängung mit zwei Rädern



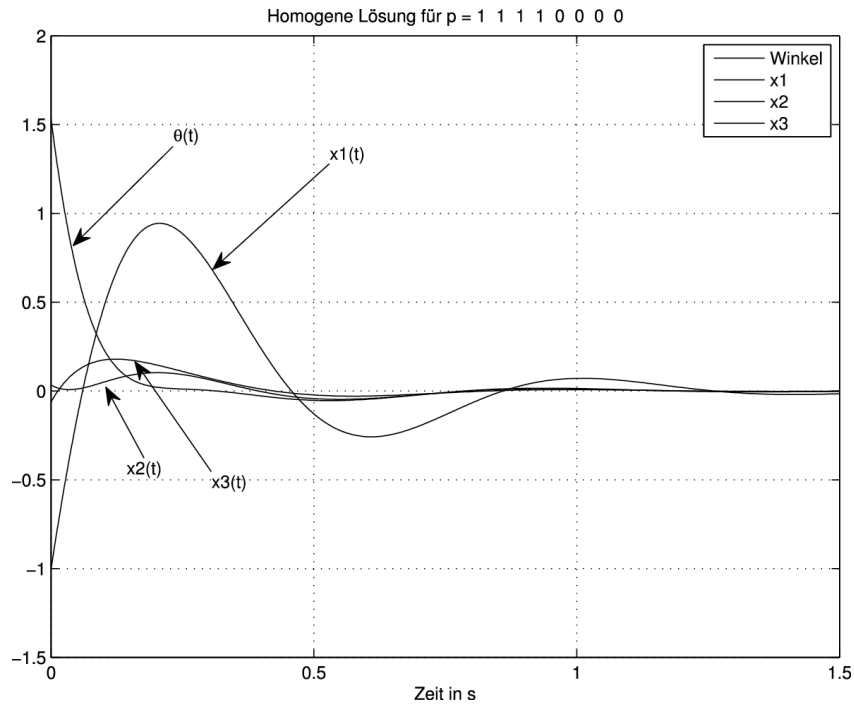

**Abb. 1.12:** Homogene Lösung (suspension\_2.m, suspension2.mdl)

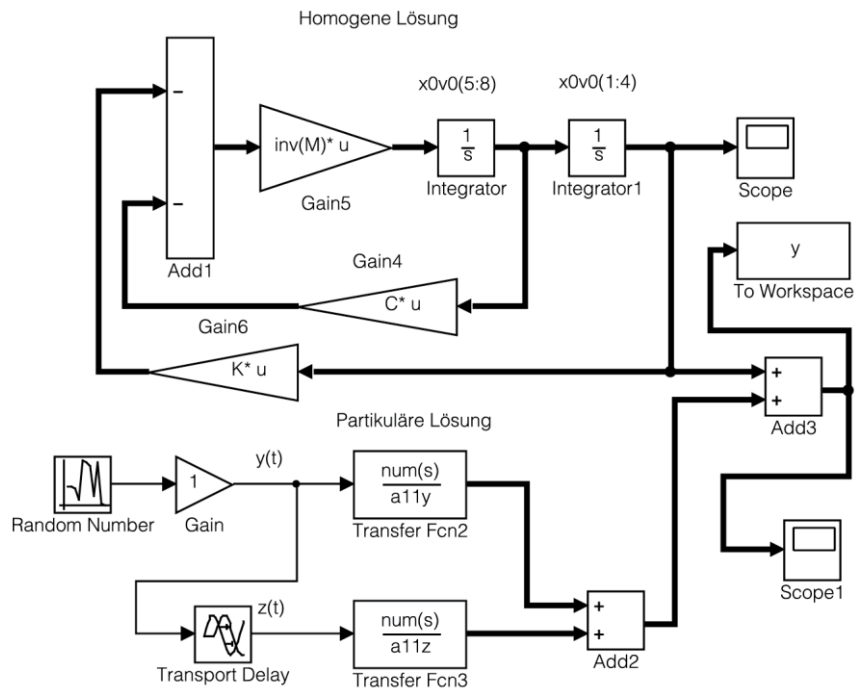

**Abb. 1.13:** Simulink-Modell der Untersuchung der Aufhängung mit zwei Achsen (suspension\_2.m, suspension2.mdl)

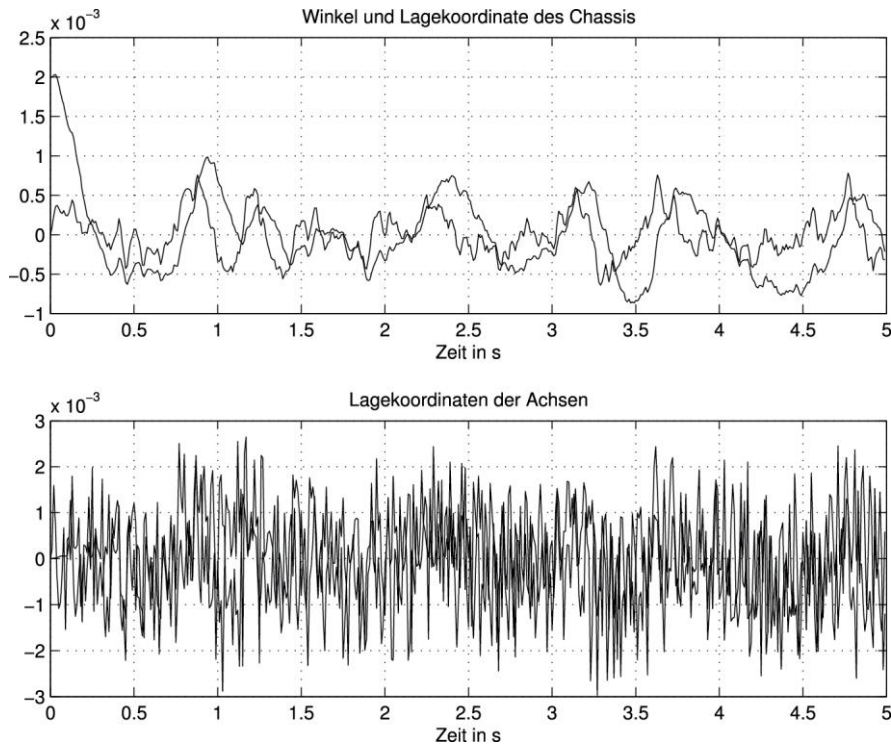

**Abb. 1.14:** a) Gesamtlösung mit den Variablen  $\theta(t)$  und  $x_1(t)$  b) mit den Variablen  $x_2(t)$  und  $x_3(t)$  (suspension\_2.m, suspension2.mdl)

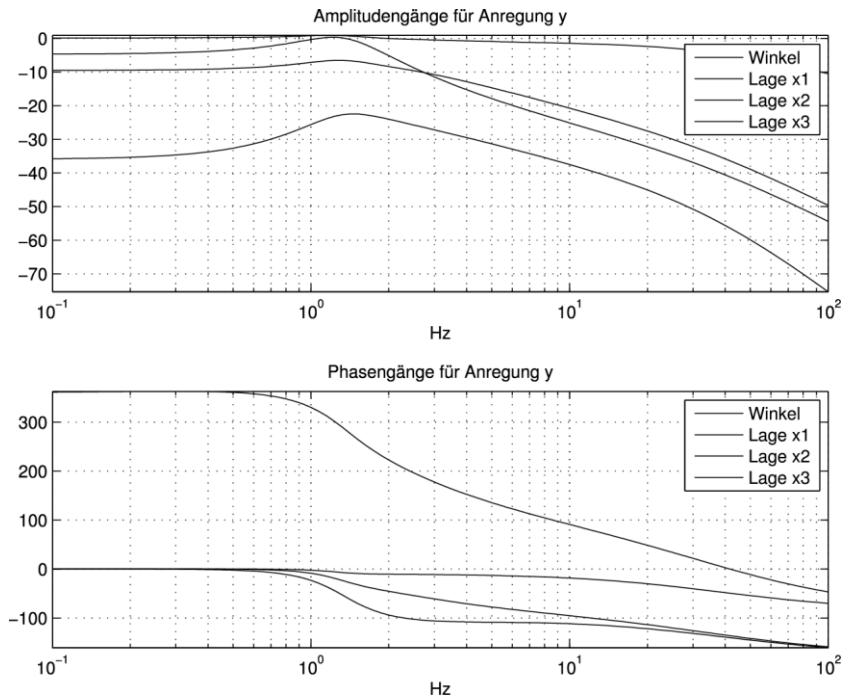

**Abb. 1.15:** Frequenzgänge von der Anregung  $y(t)$  bis zu den Variablen des Systems (suspension\_2.m, suspension2.mdl)

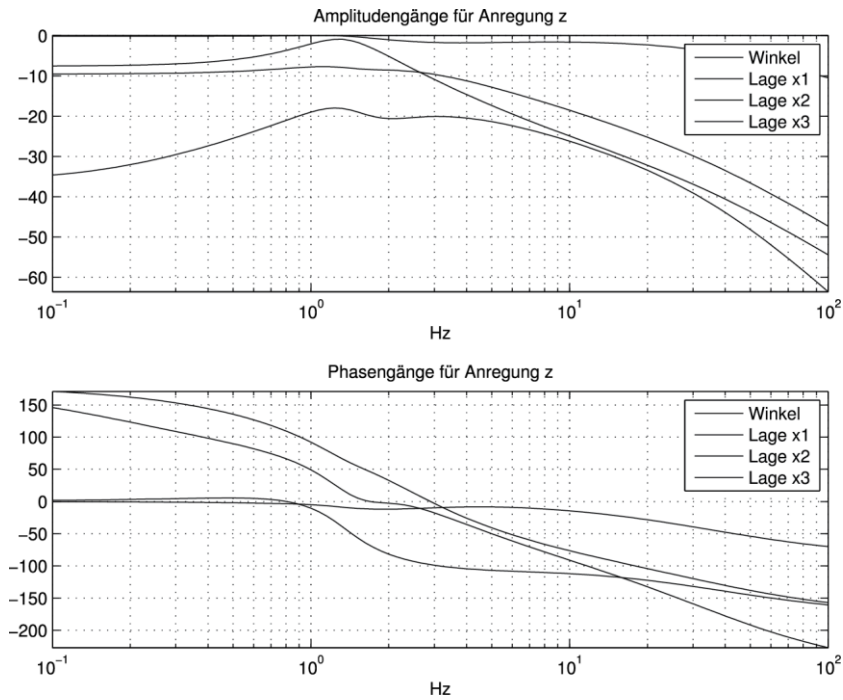

**Abb. 1.16:** Frequenzgänge von der Anregung  $z(t)$  bis zu den Variablen des Systems (suspension\_2.m, suspension2.mdl)

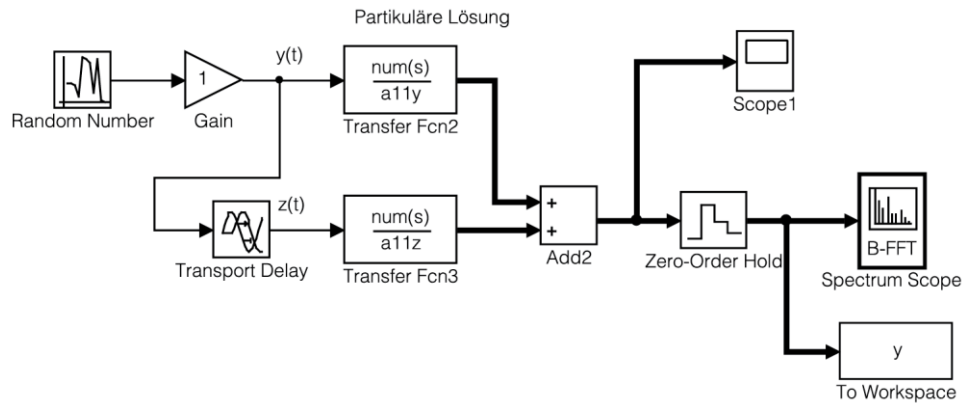

**Abb. 1.17:** Simulink-Modell der Untersuchung der spektralen Leistungsdichten (suspension\_3.m, suspension3.mdl)

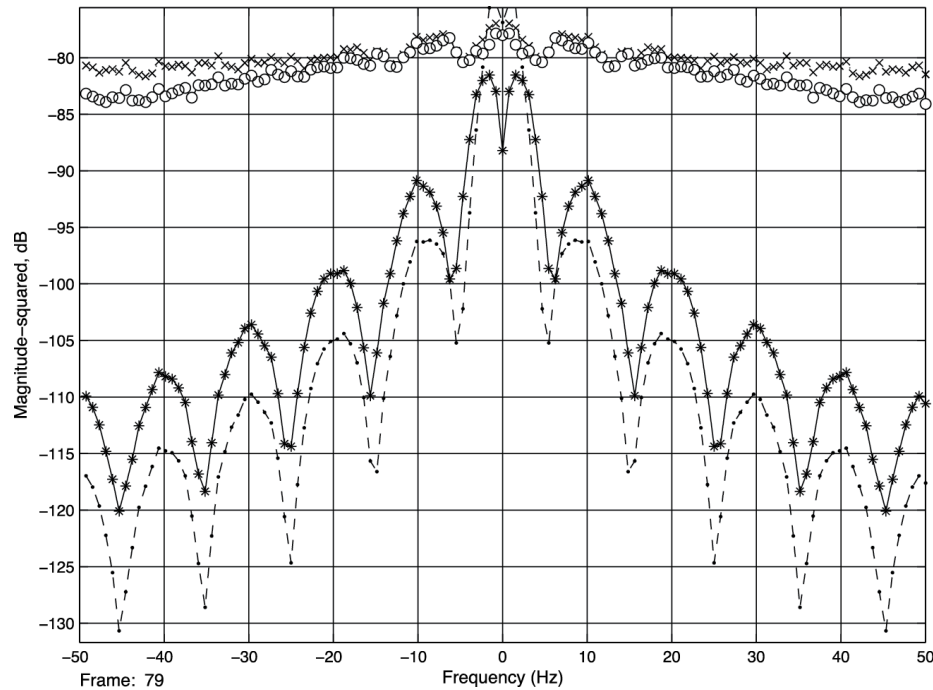

**Abb. 1.18:** Spektrale Leistungsdichten vom *Spectrum Scope* (suspension\_3.m, suspension3.mdl)

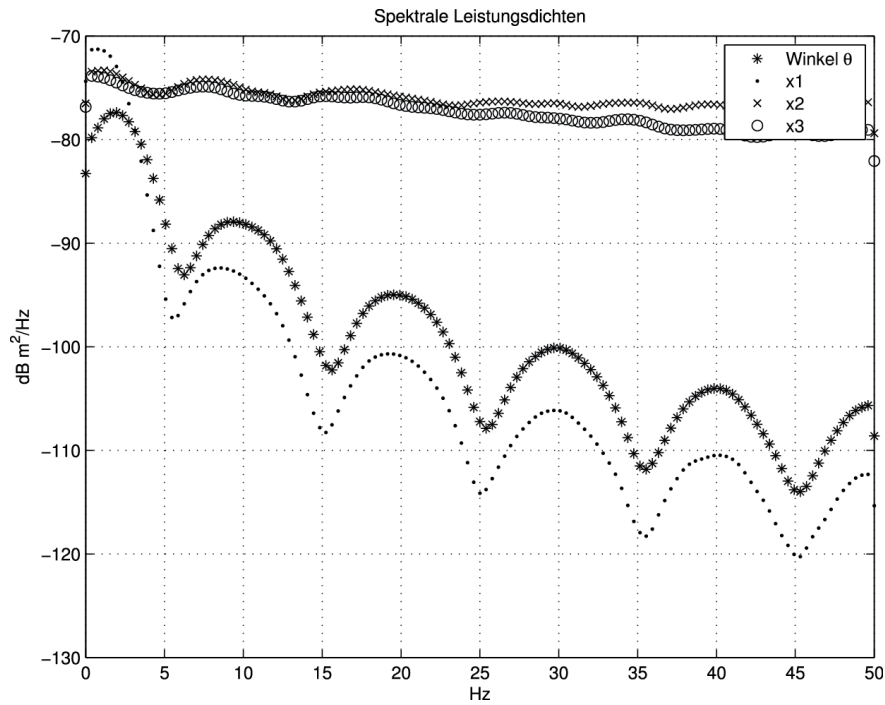

**Abb. 1.19:** Berechnete spektrale Leistungsdichten (suspension\_3.m, suspension3.mdl)



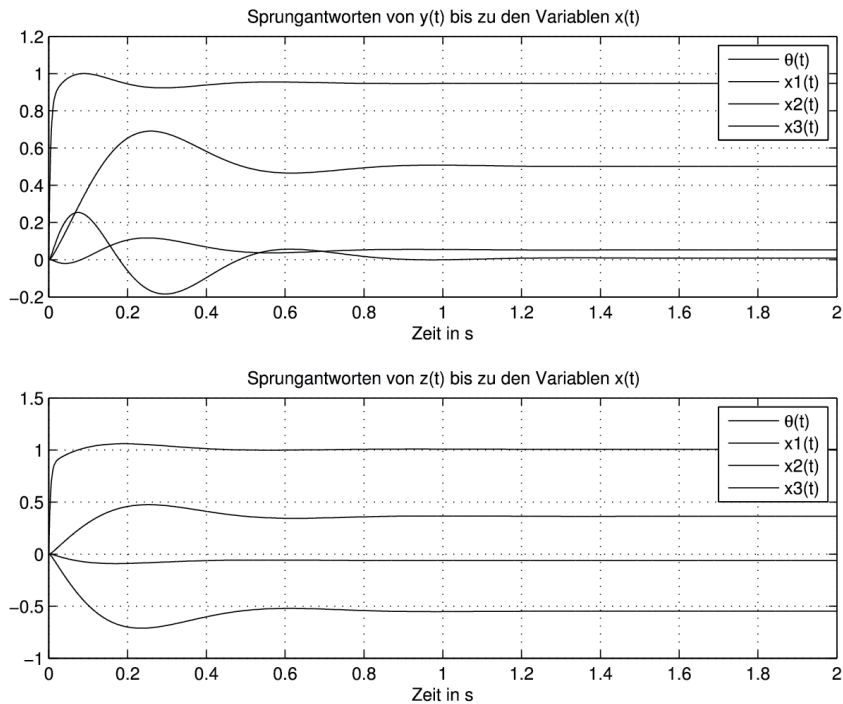

**Abb. 1.20:** a) Sprungantworten vom Eingang  $y(t)$  b) Sprungantworten vom Eingang  $z(t)$  (suspension\_4.m)

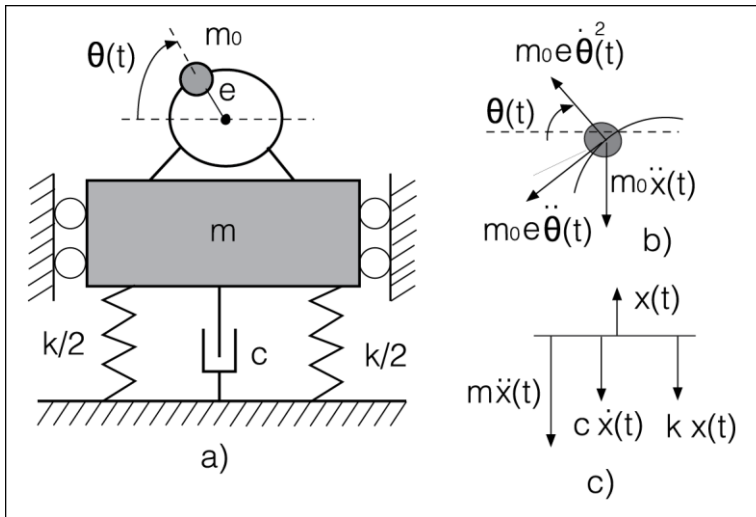

**Abb. 1.21:** a) Feder-Masse-System mit Unwuchtanregung b) Kräfte die auf die Unwuchtmasse wirken c) Kräfte die auf die Hauptmasse wirken

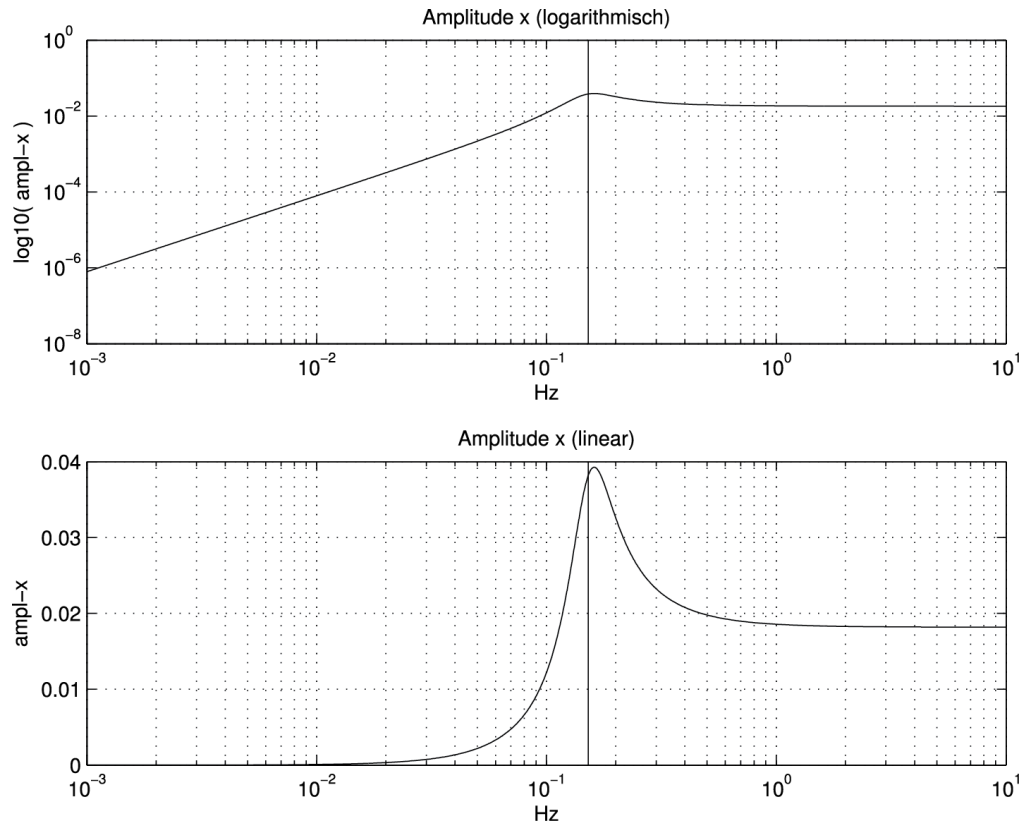

**Abb. 1.22:** Amplitude der Bewegung abhängig von  $\omega$  (unwucht\_1.m)

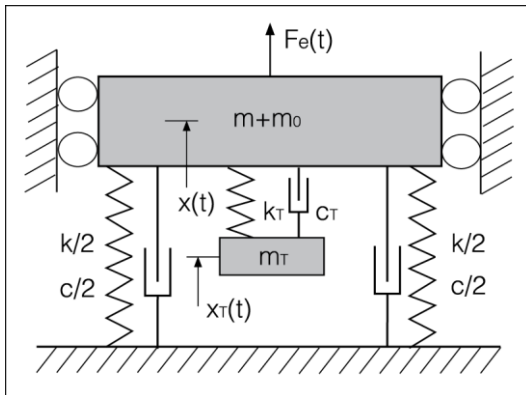

**Abb. 1.23:** Das System mit der Unwuchtkraft und mit Tilger

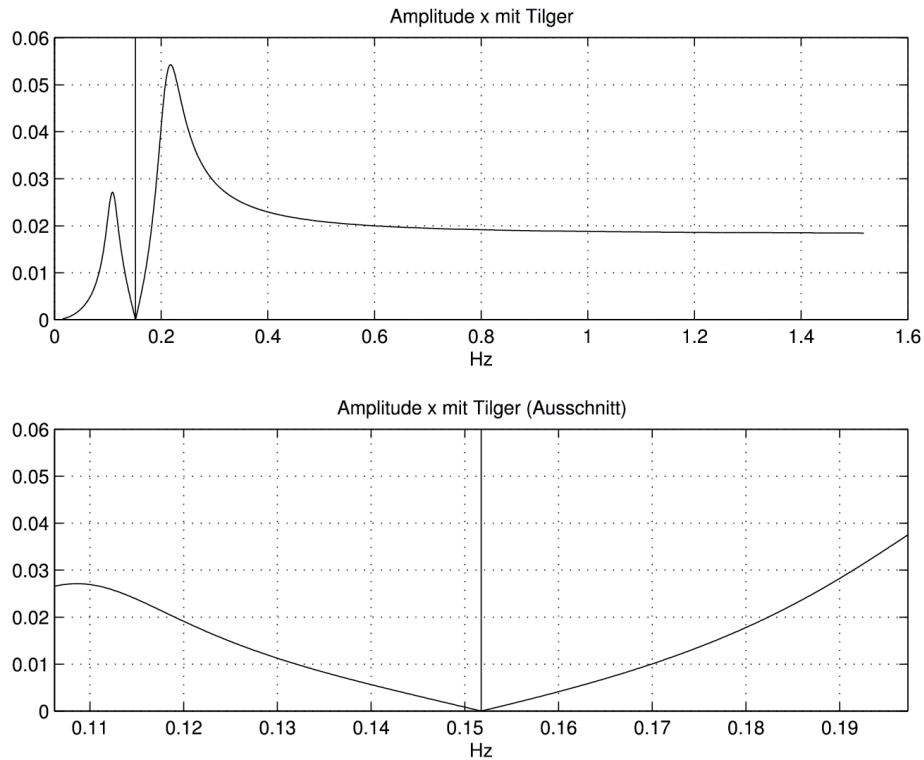

**Abb. 1.24:** Amplitude der Hauptmasse mit Tilger abhängig von  $\omega$  (unwucht\_2.m)

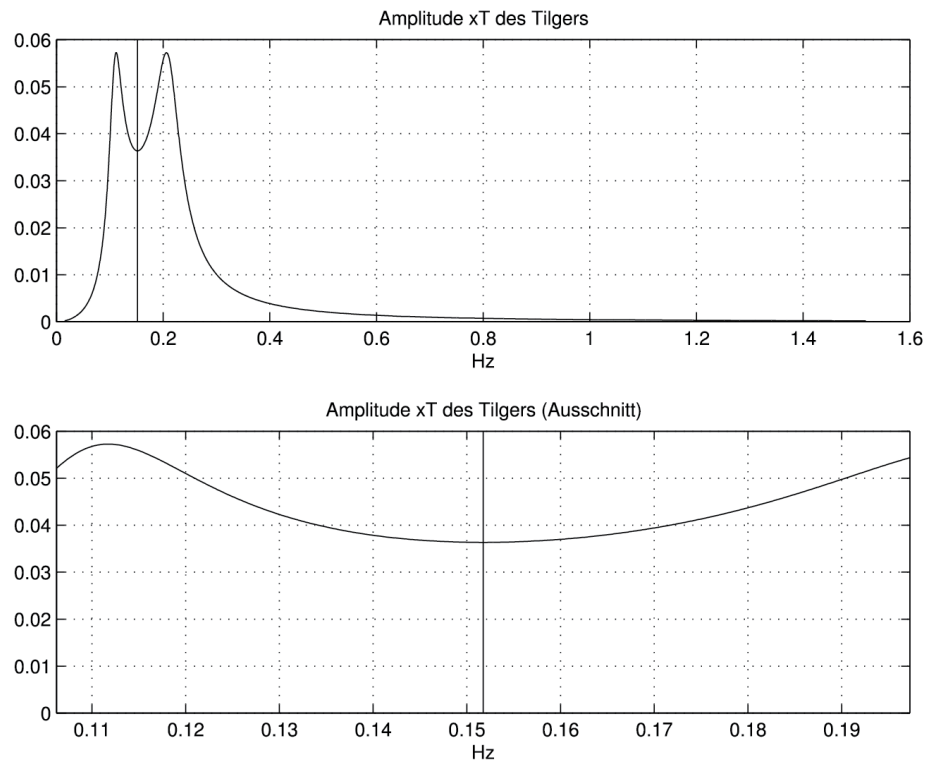

**Abb. 1.25:** Amplitude der Masse des Tilgers abhängig von  $\omega$  (unwucht 2.m)

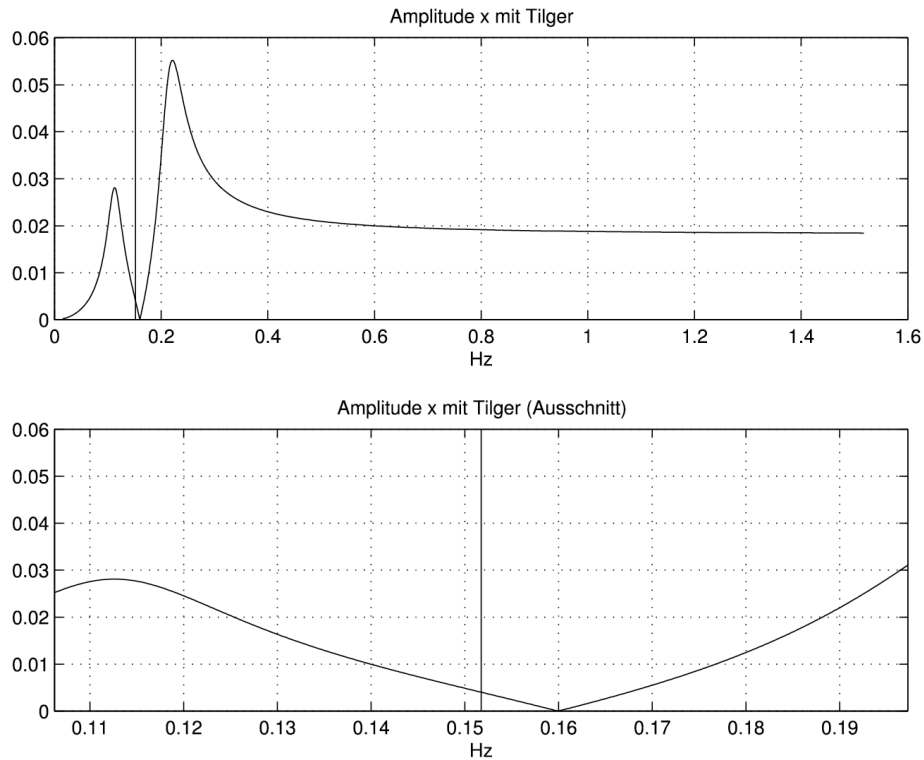

**Abb. 1.26:** Amplitude der Hauptmasse mit Tilger abhängig von  $\omega$ , wenn die Anpassung der Tilgerfrequenz nicht genau ist (unwucht\_2.m)

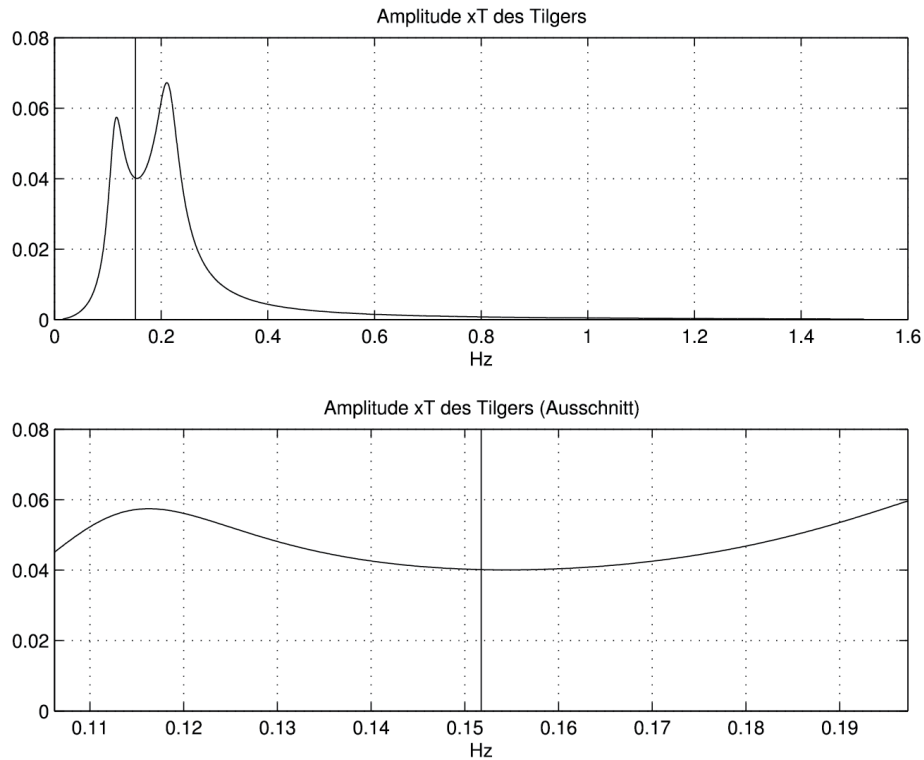

**Abb. 1.27:** Amplitude der Masse des Tilgers abhängig von  $\omega$ , wenn die Anpassung der Tilgerfrequenz nicht genau ist (unwucht\_2.m)



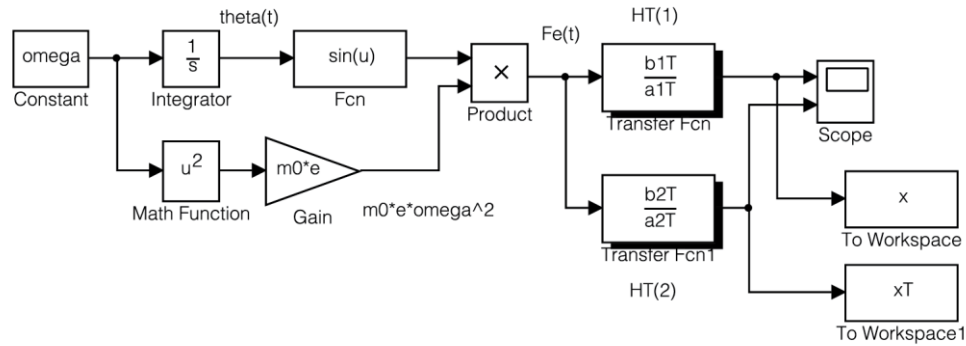

**Abb. 1.28:** Simulink-Modell des Feder-Masse-Systems mit Tilger (unwucht\_3.m)

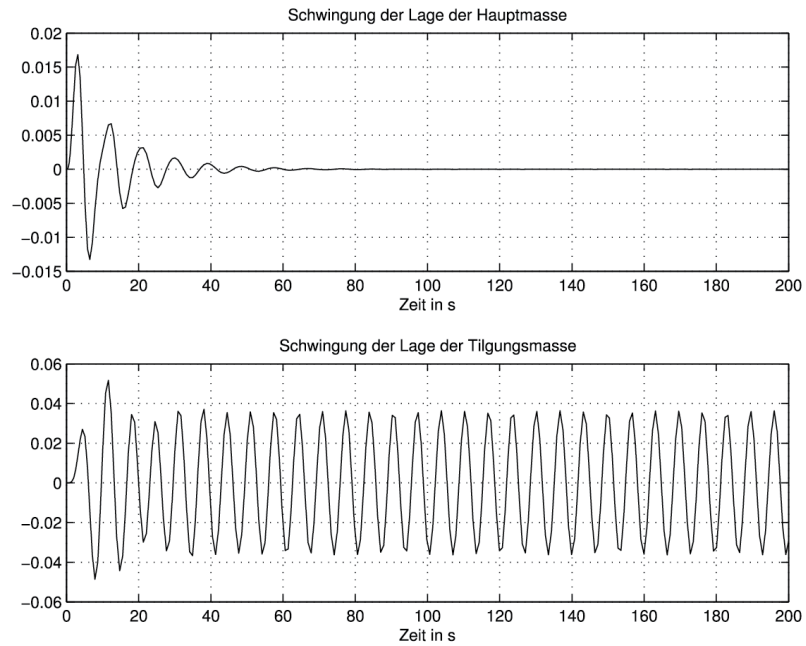

**Abb. 1.29:** Schwingung der Hauptmasse und der Tilgungsmasse bei angepasster Tilgereigenfrequenz (unwucht\_3.m)

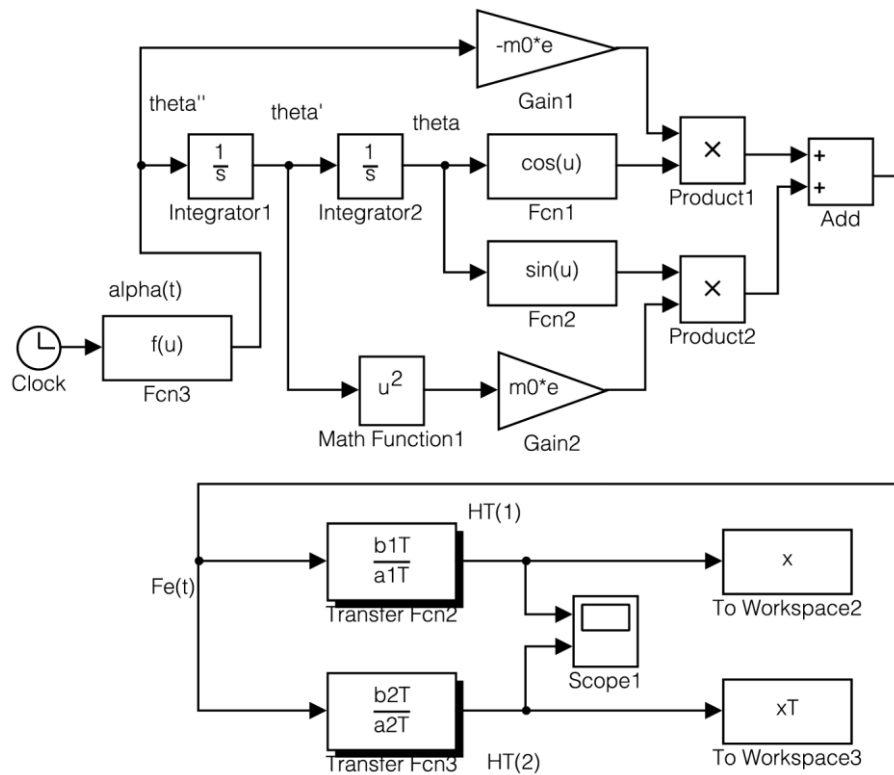

**Abb. 1.30:** Simulink-Modell der Untersuchung des Anlaufs des Systems mit Unwucht (unwucht\_4.m, unwucht4.mdl)

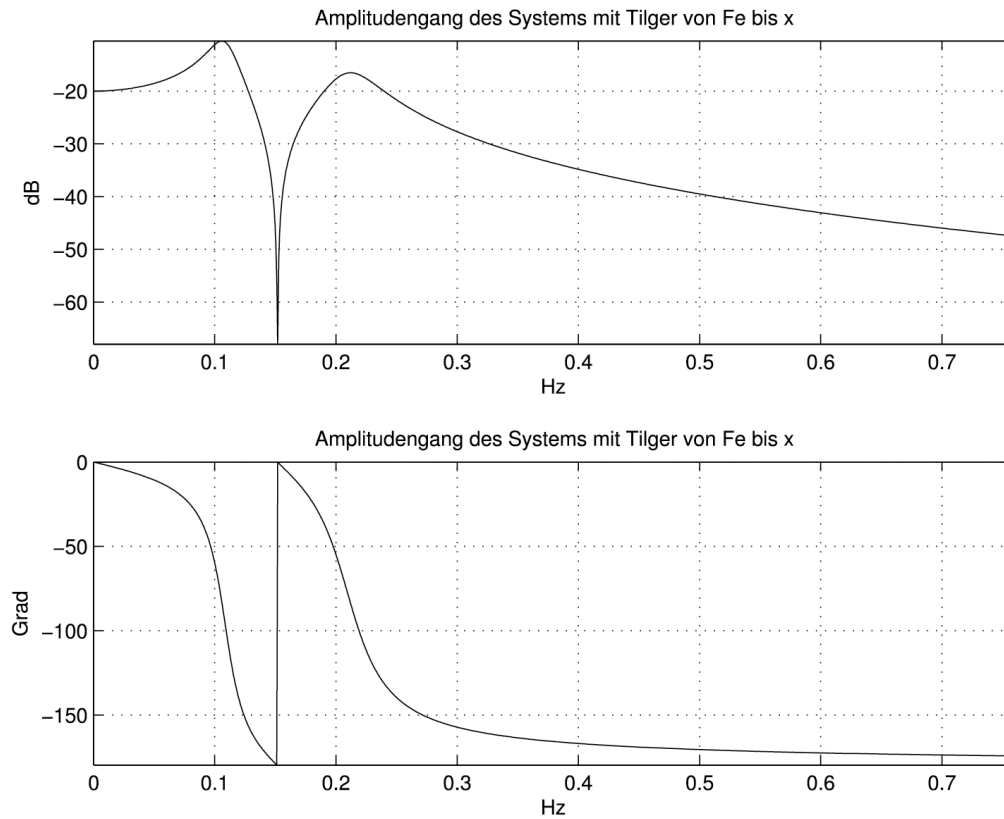

**Abb. 1.31:** Frequenzgang von der Anregung  $F_e(t)$  bis zur Lage der Hauptmasse  $x(t)$  (unwucht\_4.m, unwucht4.mdl)

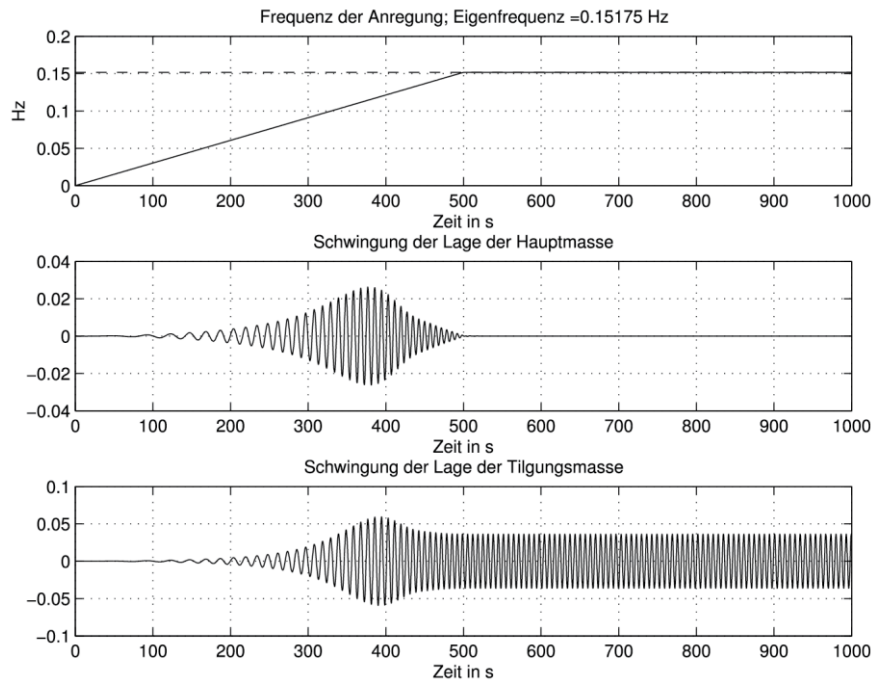

**Abb. 1.32:** a) Frequenzänderung der Anregung b) Lage der Hauptmasse c) Lage der Tilgungsmasse (unwucht\_4.m, unwucht4.mdl)

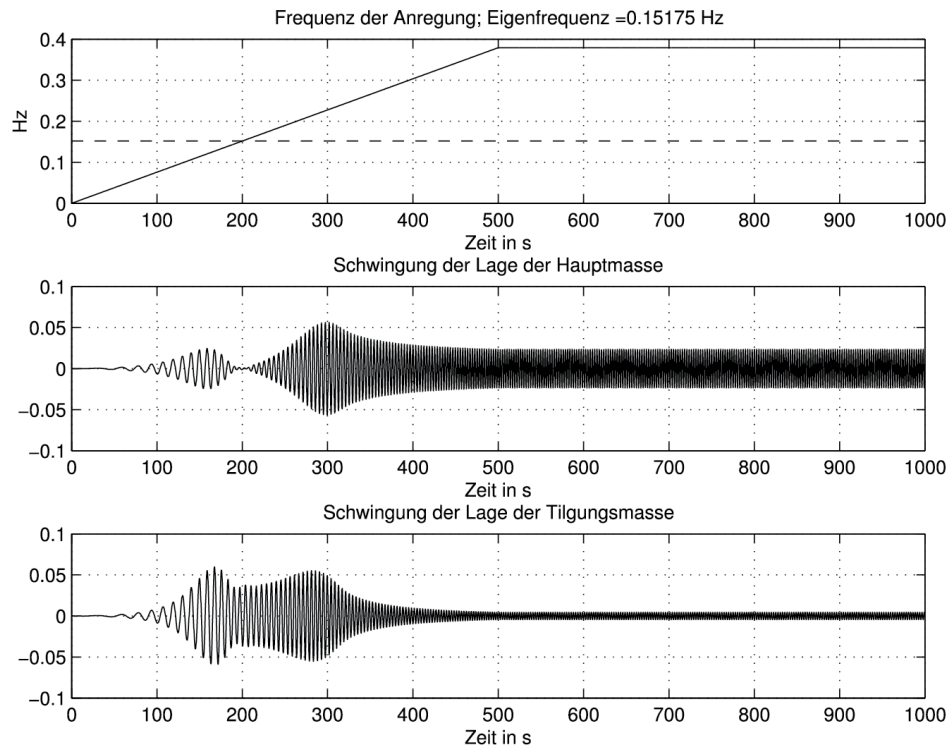

**Abb. 1.33:** a) Frequenzänderung der Anregung mit  $f_r > f_0$  b) Lage der Hauptmasse c) Lage der Tilgungsmasse (unwucht\_4.m, unwucht4.mdl)

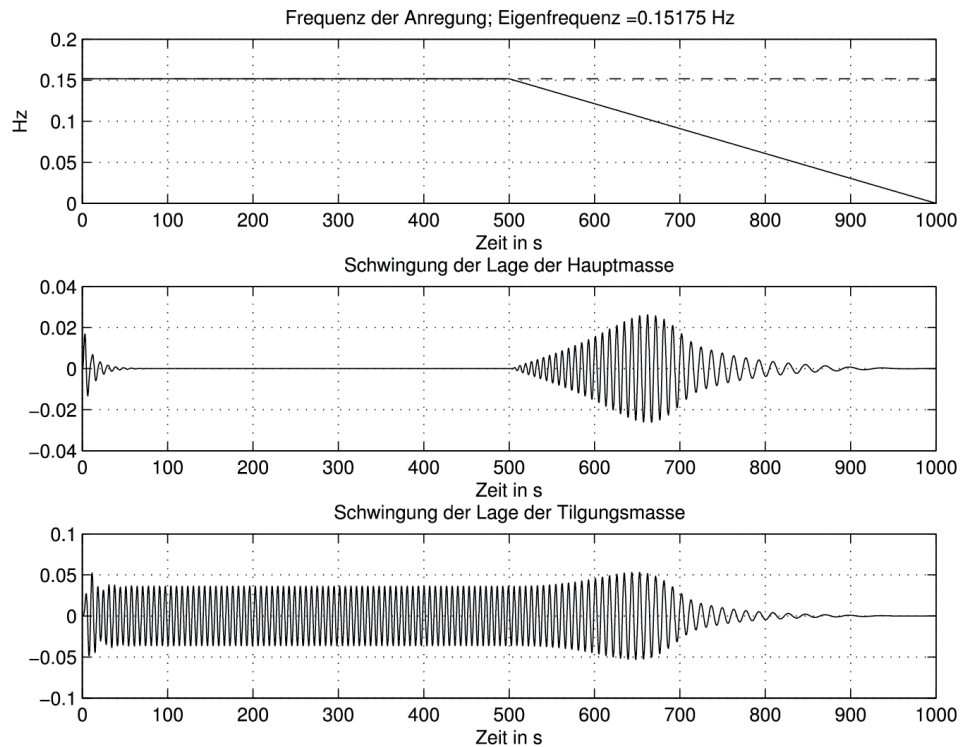

**Abb. 1.34:** a) Frequenzänderung der Anregung beim Auslauf mit  $f_r = f_0$  b) Lage der Hauptmasse c) Lage der Tilgungsmasse (unwucht\_5.m, unwucht5.mdl)

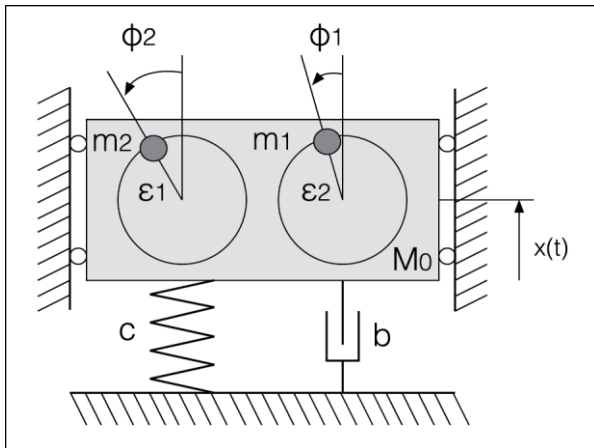

**Abb. 1.35:** Mechanisches System mit Unwuchtr rotoren



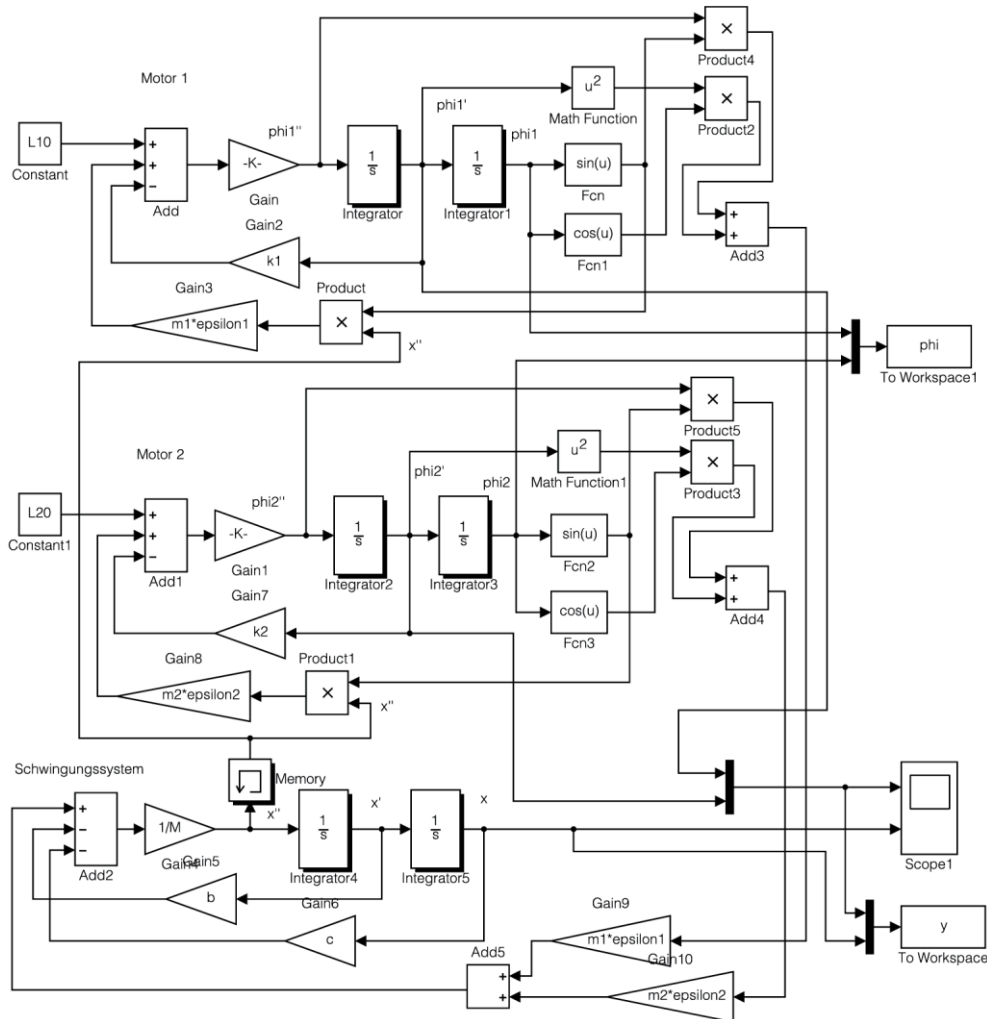

**Abb. 1.36:** Simulink-Modell der Selbstsynchronisation von zwei Unwuchtroten (unwucht\_synchro1.m, unwucht\_synchro\_1.mdl)

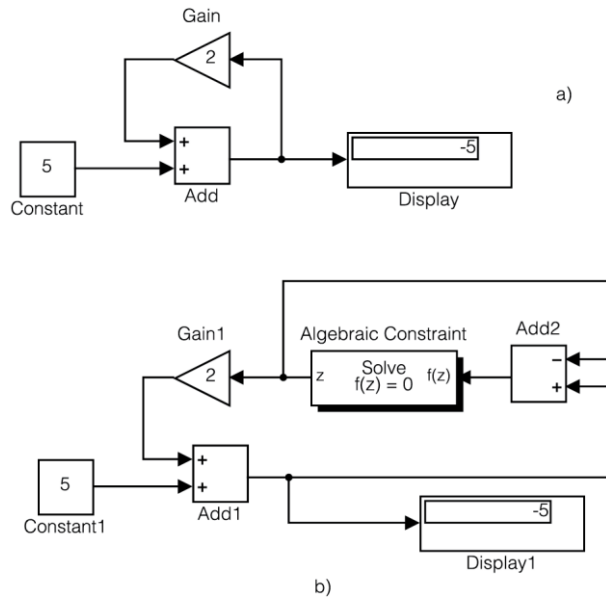

**Abb. 1.37:** Simulink-Modell einfacher algebraischen Schleifen (algebraisch\_schl\_1.mdl)

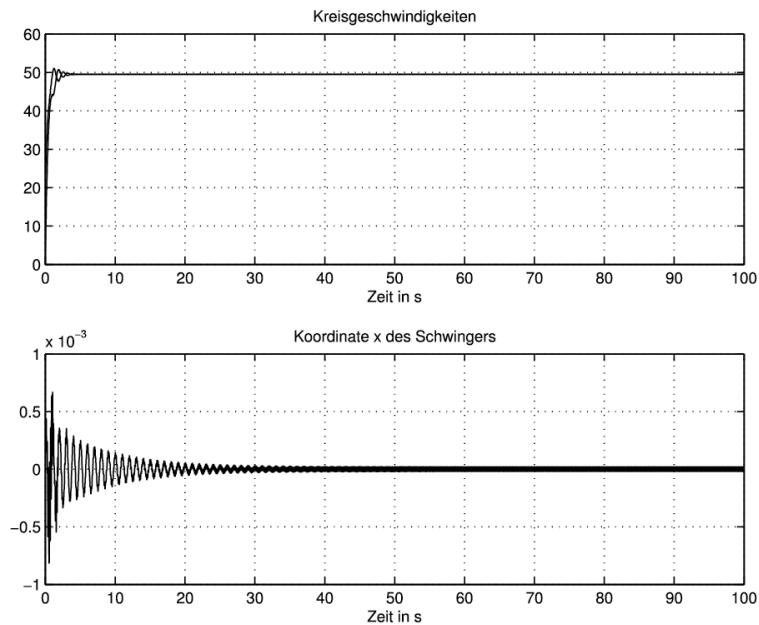

**Abb. 1.38:** Kreisgeschwindigkeiten der Motoren und Koordinate  $x(t)$  des Schwingers (algebraisch\_schl\_1.mdl)

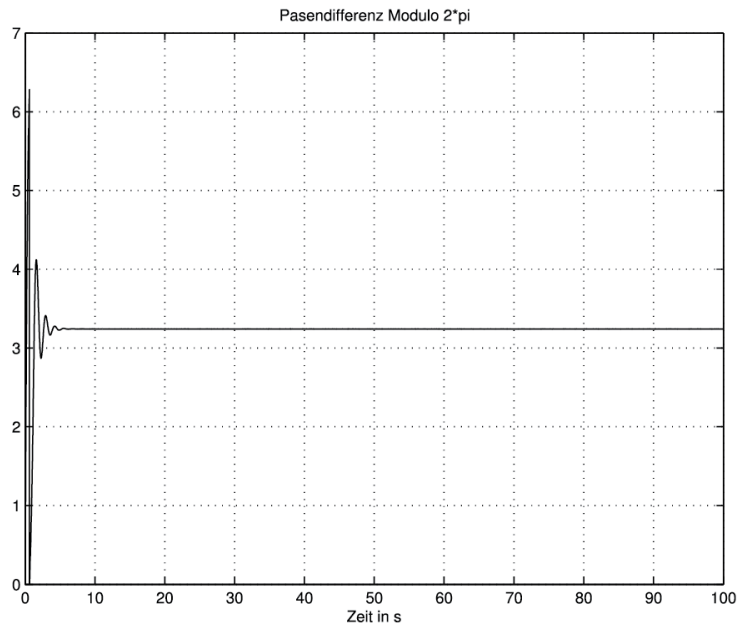

**Abb. 1.39:** Phasendifferenz Modulo  $2\pi$  (algebraisch\_schl\_1.mdl)

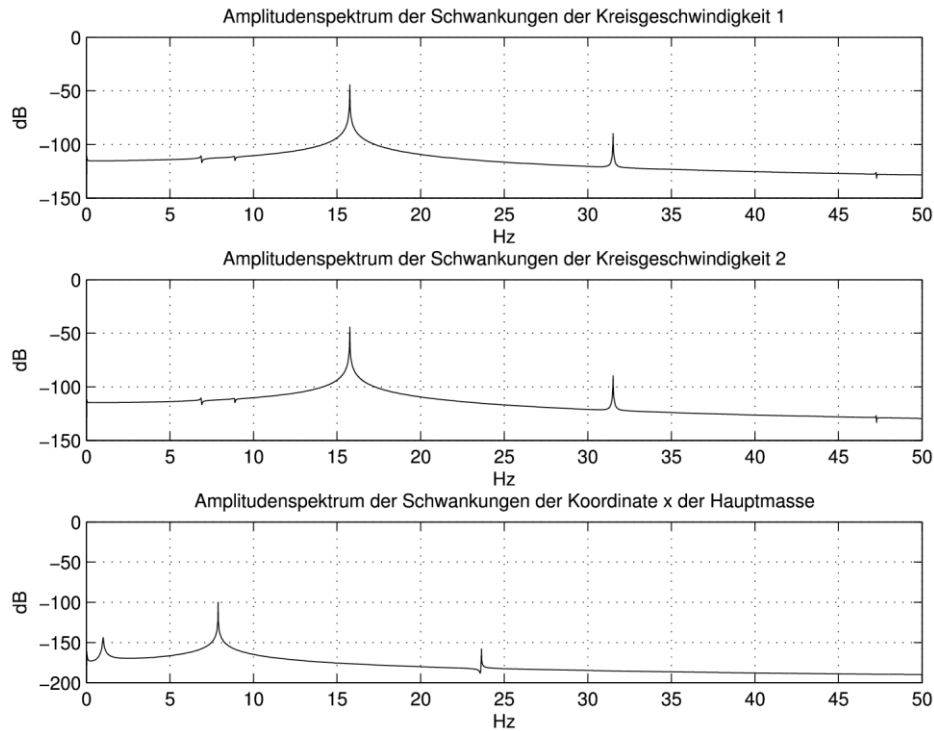

**Abb. 1.40:** Amplitudenspektren der Schwingungen der Kreisgeschwindigkeiten und der Koordinate  $x$  des Schwingers (algebraisch\_schl\_1.mdl)

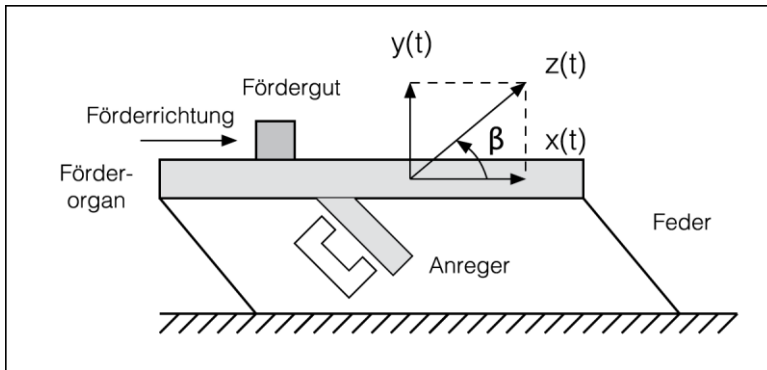

**Abb. 1.41:** Skizze eines Linearförderers

Geschwindigkeit\*10 in x Richtung; Vertikale Beschleunigung und Lage des Förderorgans in x Richtung (fanr = 4 Hz)

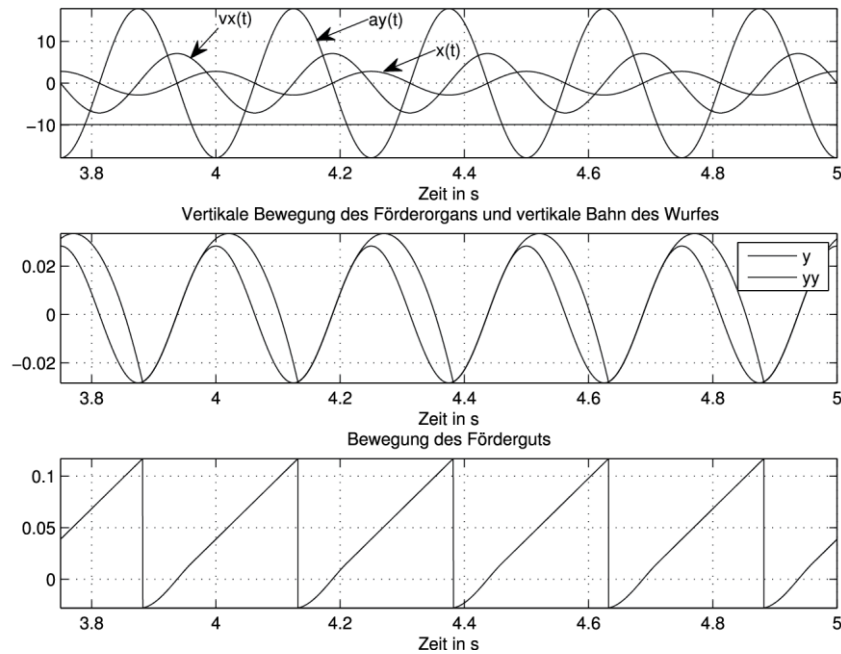

**Abb. 1.42:** a) Geschwindigkeit mal 10 in x-Richtung; Vertikale Beschleunigung und Lage des Förderorgans in x-Richtung mal 100 b) Vertikale Bewegung des Förderorgans und vertikale Bahn des schiefen Wurfes c) Bewegung des Förderguts (wurf\_12.m)

Geschwindigkeit\*10 in x Richtung; Vertikale Beschleunigung und Lage des Förderorgans in x Richtung ( $f_{\text{anr}} = 4 \text{ Hz}$ )

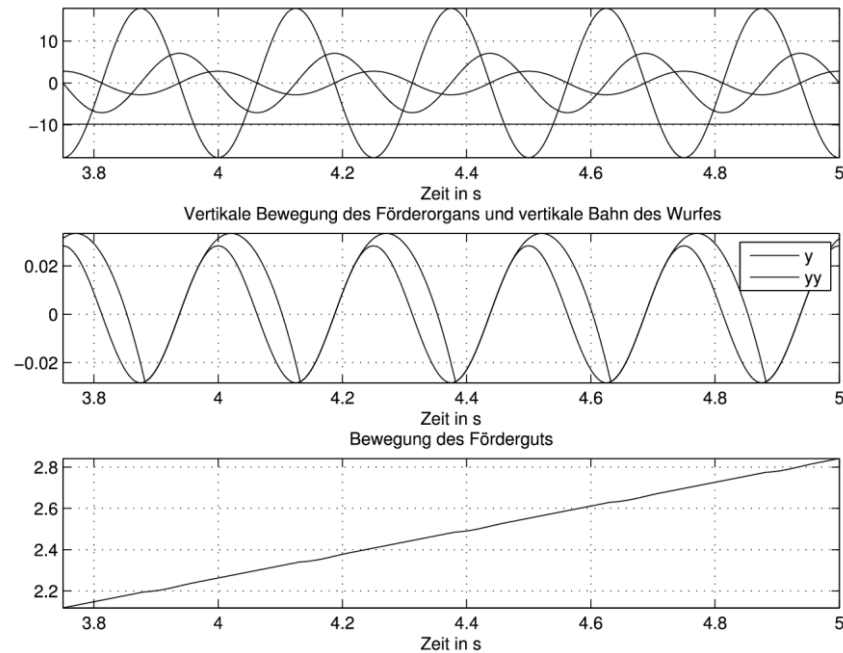

**Abb. 1.43:** a) Geschwindigkeit mal 10 in x-Richtung; Vertikale Beschleunigung und Lage des Förderorgans in x-Richtung mal 100 b) Vertikale Bewegung des Förderorgans und vertikale Bahn des schiefen Wurfes c) Bewegung eines Förderguts über mehrere Perioden (wurf\_13.m)



Geschwindigkeit\*10 in x Richtung; Vertikale Beschleunigung und Lage des Förderorgans in x Richtung (fannr = 4 Hz)

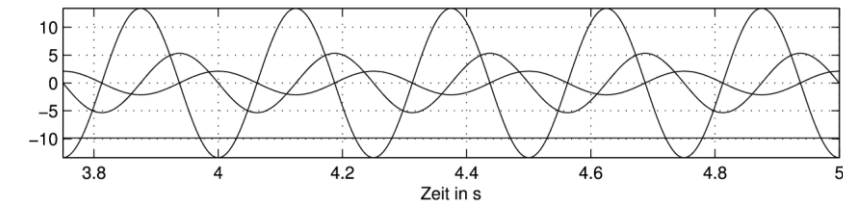

Vertikale Bewegung des Förderorgans und vertikale Bahn des Wurfes

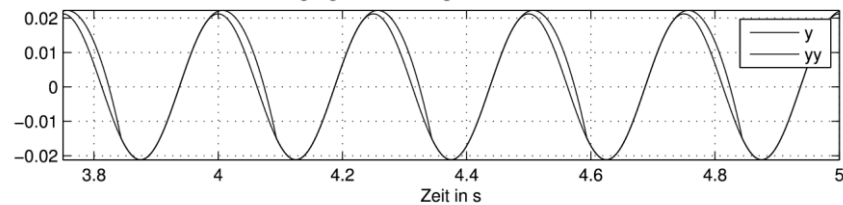

Bewegung des Förderguts

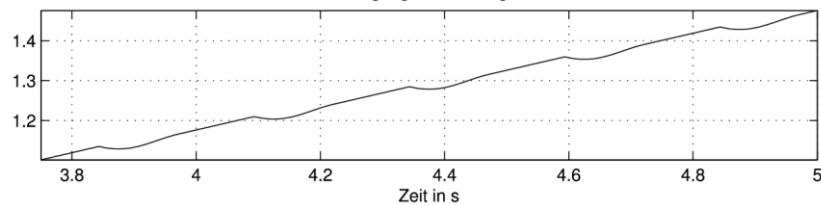

**Abb. 1.44:** a) Geschwindigkeit mal 10 in x-Richtung; Vertikale Beschleunigung und Lage des Förderorgans in x-Richtung mal 100 b) Vertikale Bewegung des Förderorgans und vertikale Bahn des schiefen Wurfes c) Bewegung eines Förderguts über mehreren Perioden (wurf\_13.m)

Geschwindigkeit\*10 in x Richtung; Vertikale Beschleunigung und Lage des Förderorgans in x Richtung (fannr = 4 Hz)

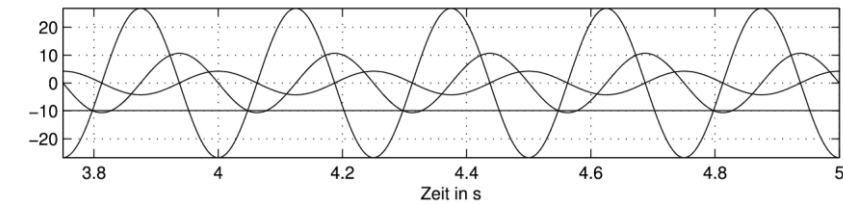

Vertikale Bewegung des Förderorgans und vertikale Bahn des Wurfes

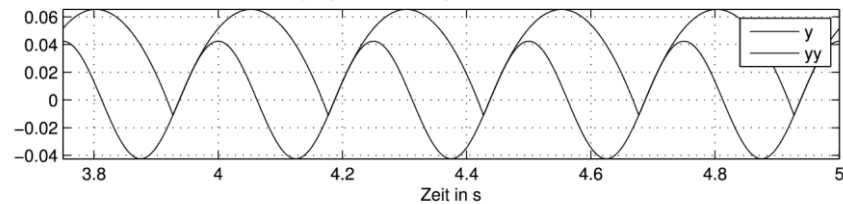

Bewegung des Förderguts

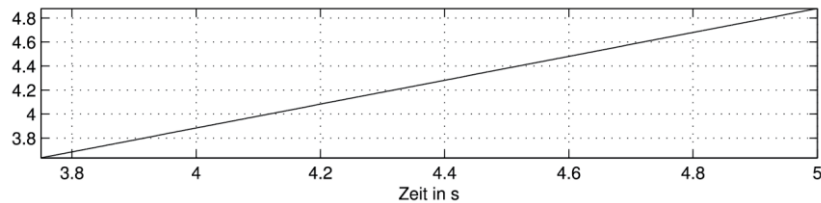

**Abb. 1.45:** a) Geschwindigkeit mal 10 in x-Richtung; Vertikale Beschleunigung und Lage des Förderorgans in x-Richtung mal 100 b) Vertikale Bewegung des Förderorgans und vertikale Bahn des schiefen Wurfes c) Bewegung eines Förderguts über mehrere Perioden (wurf\_13.m)

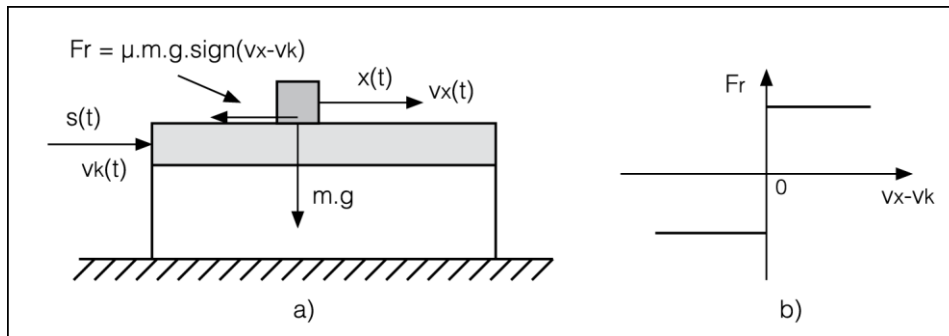

**Abb. 1.46:** a) Skizze der Förderung b) Abhängigkeit der Reibungskraft von der relativen Geschwindigkeit des Fördergutes

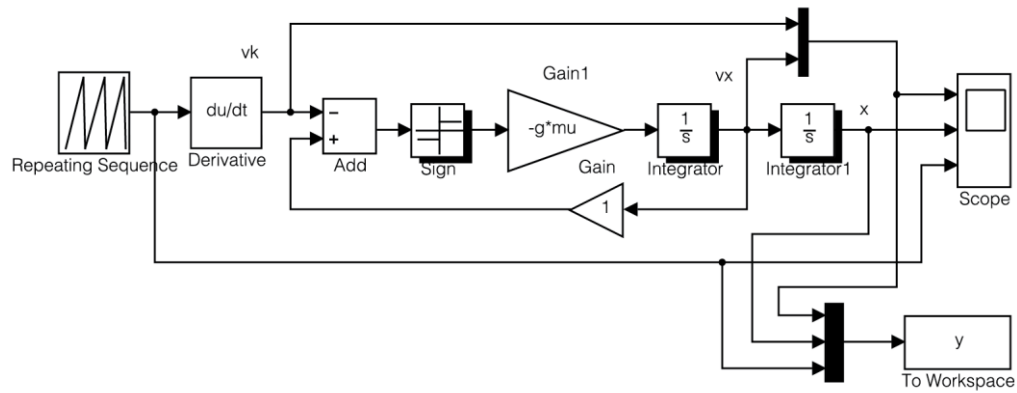

**Abb. 1.47:** Simulink-Modell der Förderung mit Haft- und Gleitreibung (foerderband\_1.m, foerderband1.mdl)

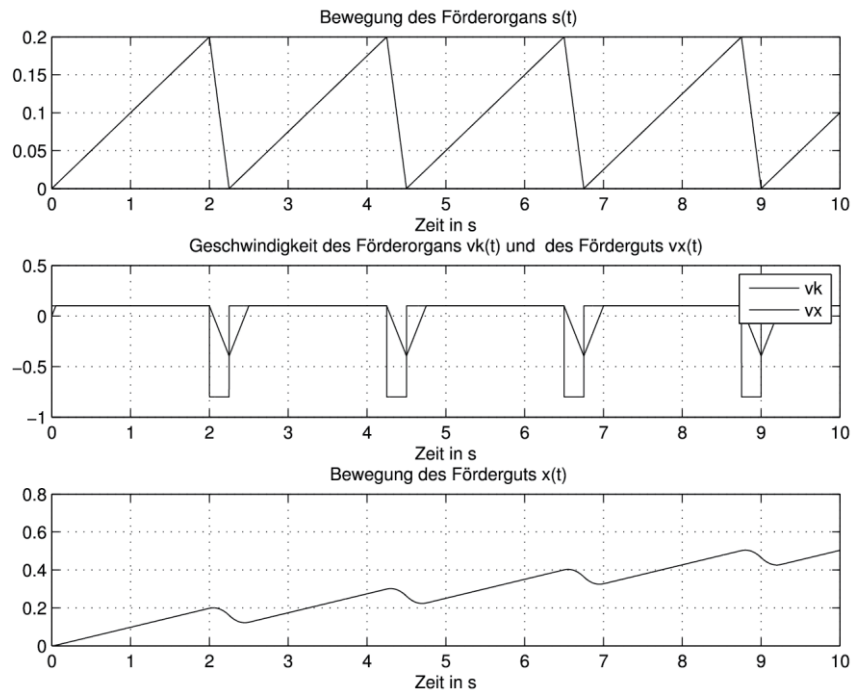

**Abb. 1.48:** Ergebnisse der Simulation der Förderung mit Haft- und Gleitreibung (foerderband\_1.m, foerderband1.mdl)

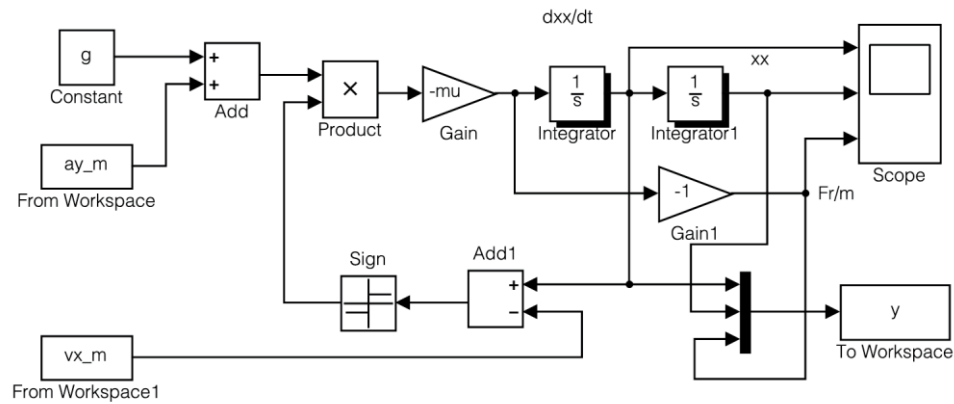

**Abb. 1.49:** Simulink-Modell für die Untersuchung des Gleitprinzips (foerder\_haft\_gleit\_1.m, foerder\_haft\_gleit1.mdl)

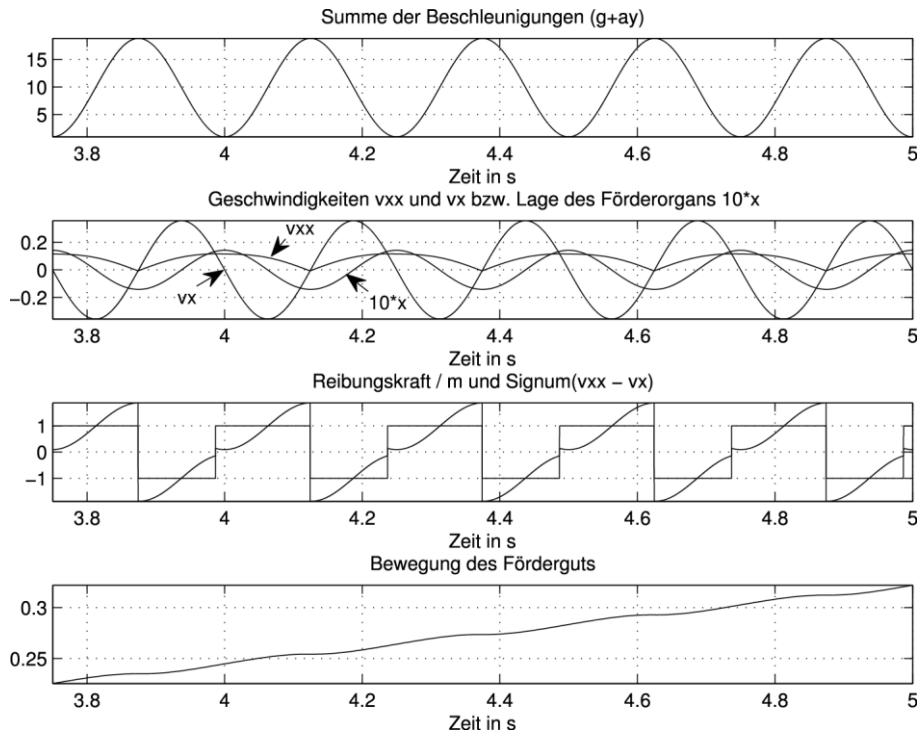

**Abb. 1.50:** Ergebnisse der Simulation der Förderung nach dem Gleitprinzip (foerder\_haft\_gleit\_1.m, foerder\_haft\_gleit1.mdl)

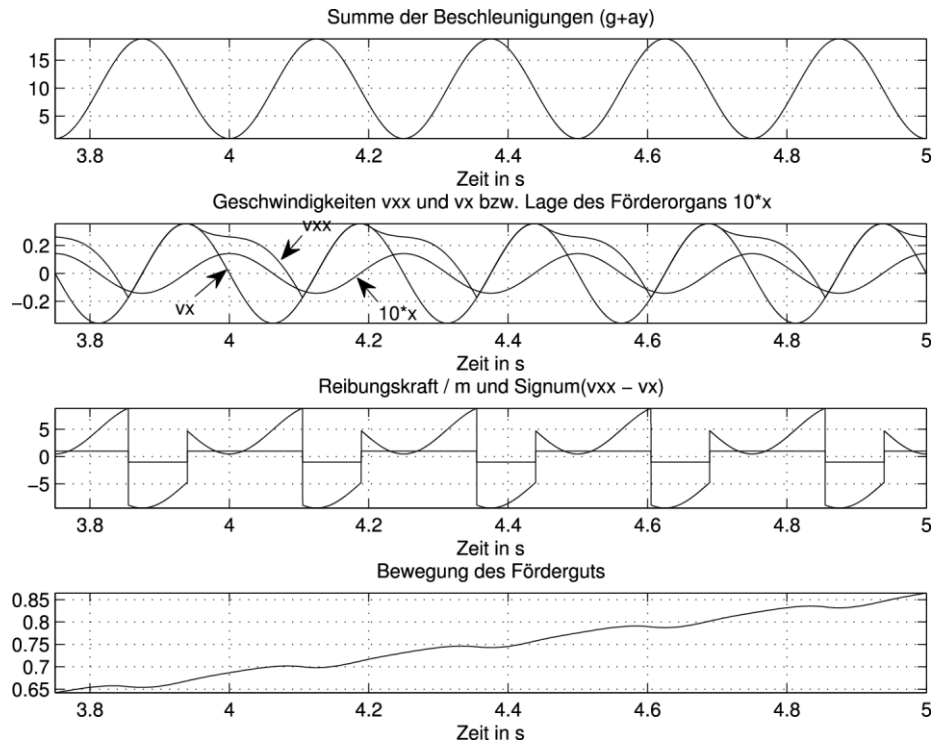

**Abb. 1.51:** Ergebnisse der Simulation der Förderung nach dem Gleitprinzip für  $\mu = 0,5$  (foerder\_haft\_gleit\_1.m, foerder\_haft\_gleit1.mdl)



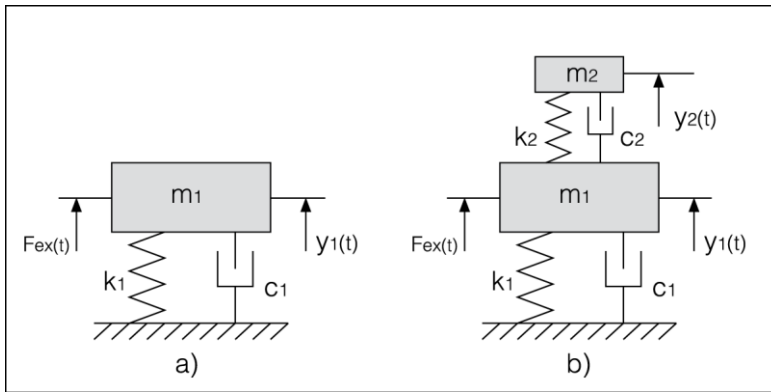

**Abb. 1.52:** a) Einfaches Feder-Masse-System b) Zweimassenschwinger mit dem zweiten Feder-Masse-System als Tilger

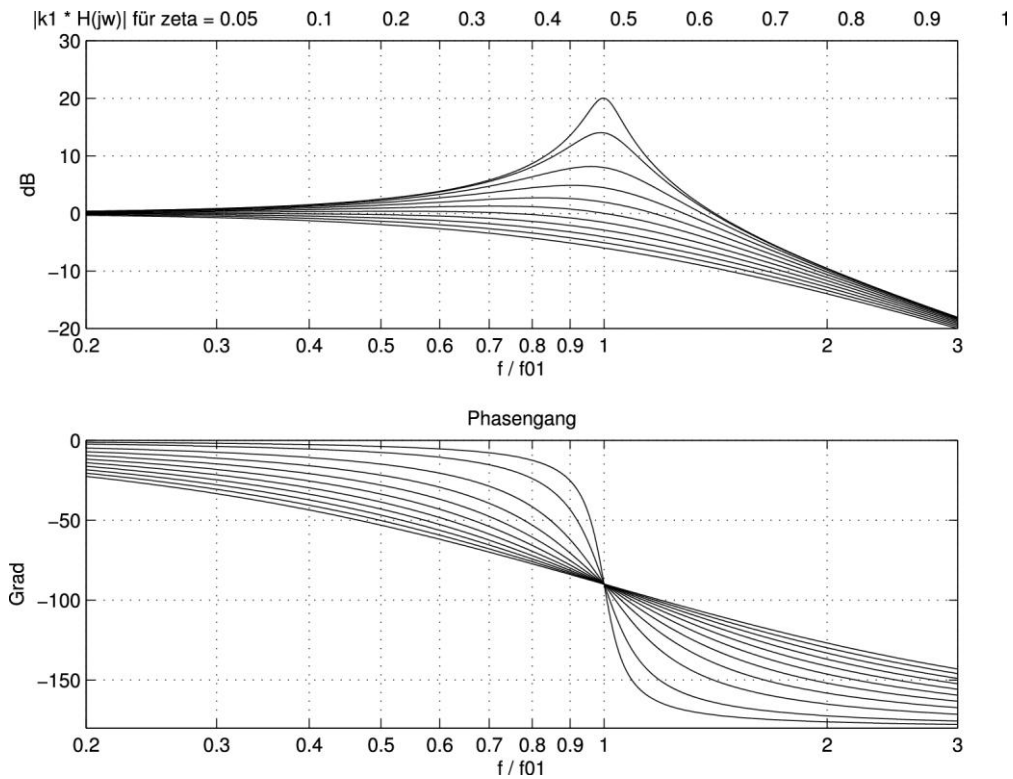

**Abb. 1.53:** Frequenzgang  $k_1 H(j\omega)$  (feder\_masse\_12.m)

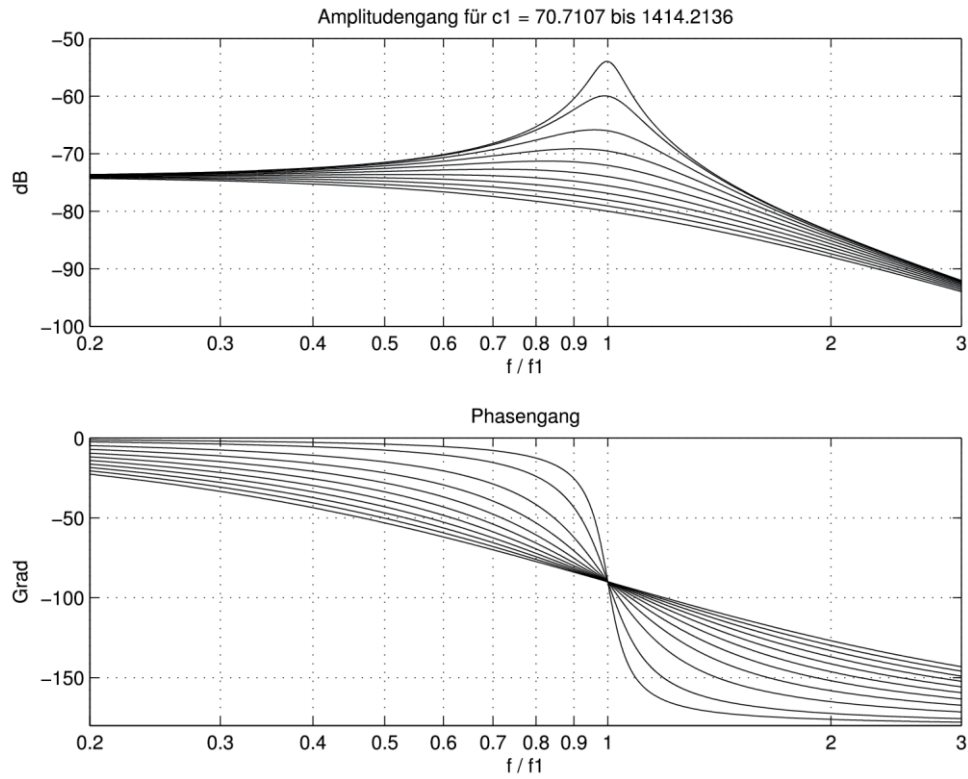

**Abb. 1.54:** Frequenzgang für nicht normierte Funktion  $H(j\omega)$  (feder\_masse\_11.m)

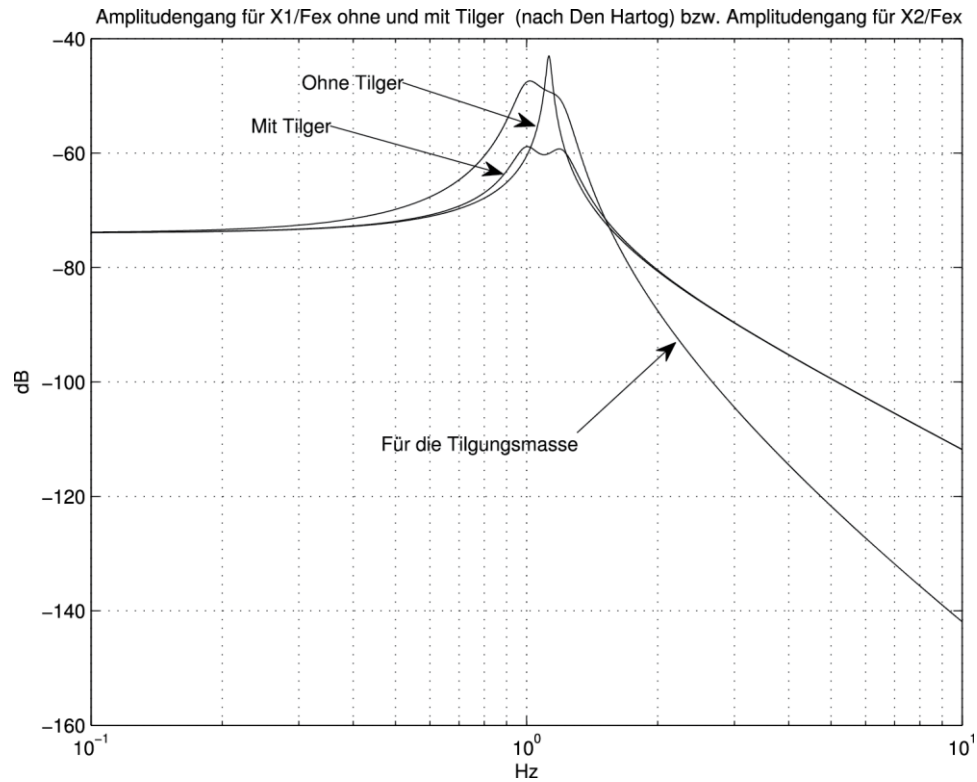

**Abb. 1.55:** Amplitudengang ohne und mit Tilger bzw. Amplitudengang für die Bewegung des Tilgers (feder\_masse\_1.m)

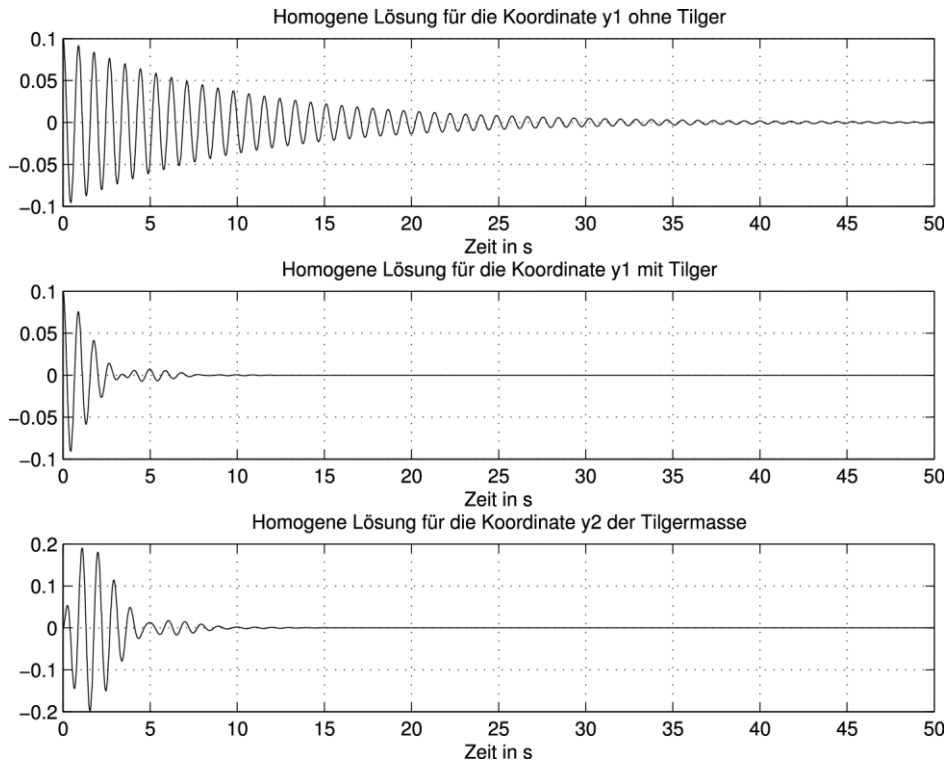

**Abb. 1.56:** Homogene Lösung für die Koordinate der Hauptmasse ohne Tilger, mit Tilger und für die Koordinate der Tilgermasse (feder\_masse\_1.m)

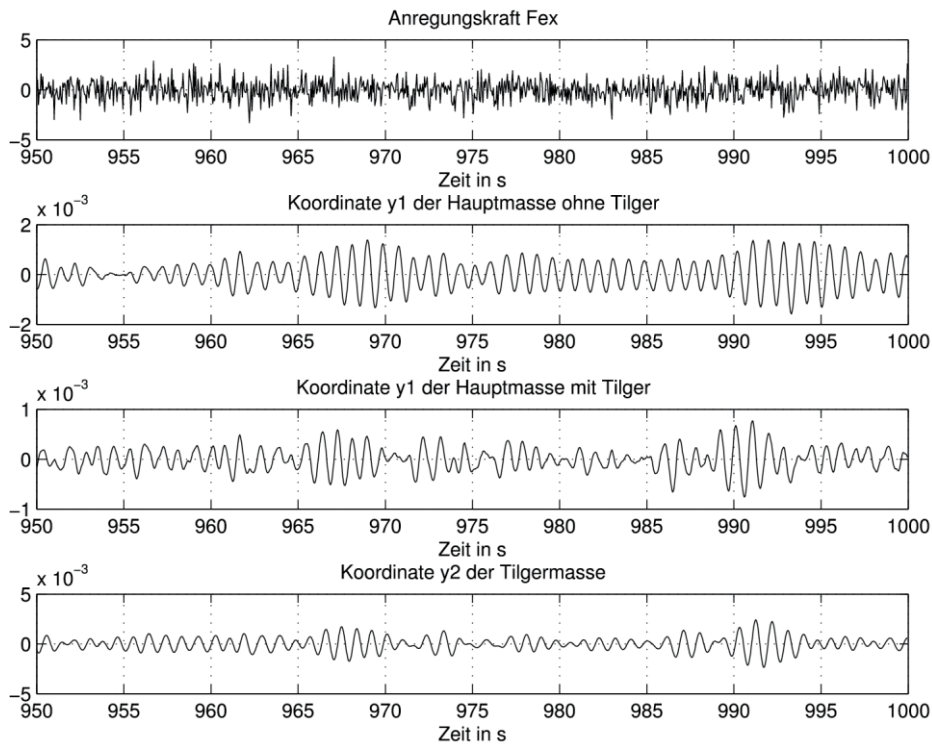

**Abb. 1.57:** Die Antworten auf zufälliger unabhängiger Anregung (feder\_masse\_1.m)

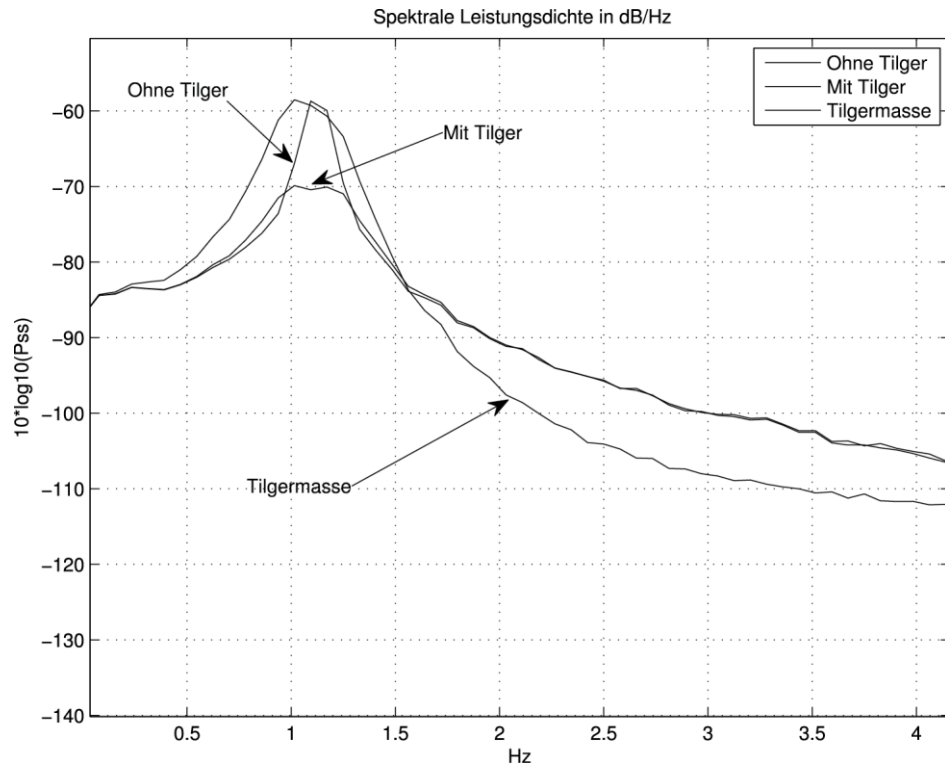

**Abb. 1.58:** Spektrale Leistungsdichten (feder\_masse\_1.m)

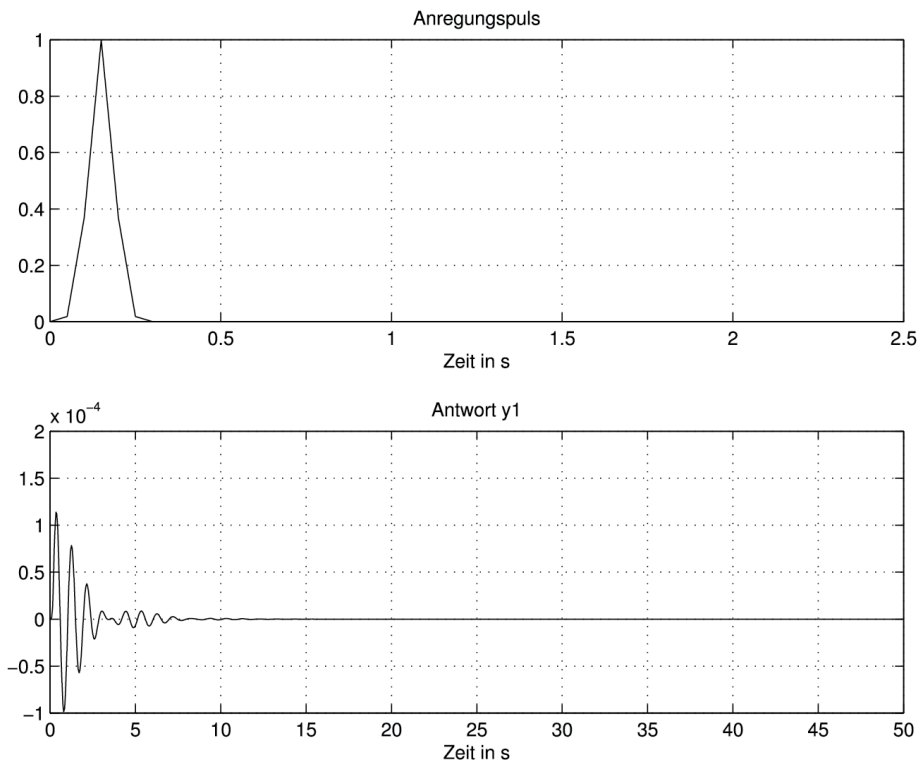

**Abb. 1.59:** Anregungspuls und Antwort für die Koordinate der Lage der Masse  $m_1$  (feder\_masse\_13.m)



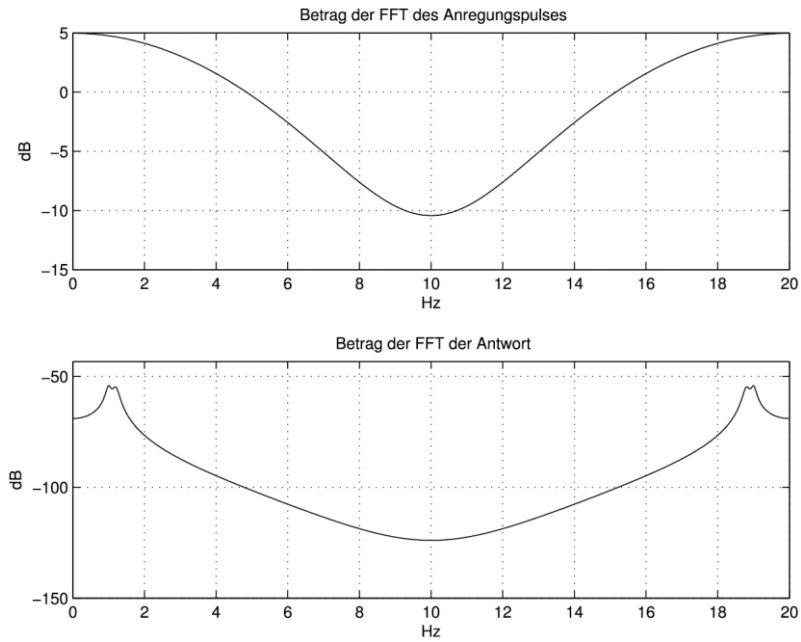

**Abb. 1.60:** Beträge der DFT des Anregungspulses und der Antwort (feder\_masse\_13.m)

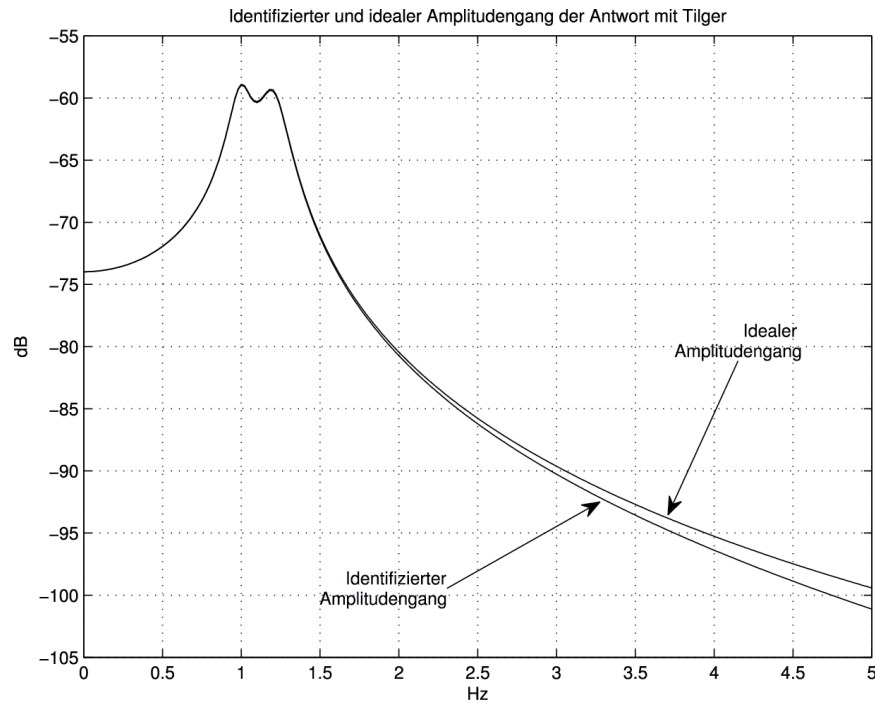

**Abb. 1.61:** Beträge des identifizierten und idealen Amplitudengangs (feder\_masse\_13.m)

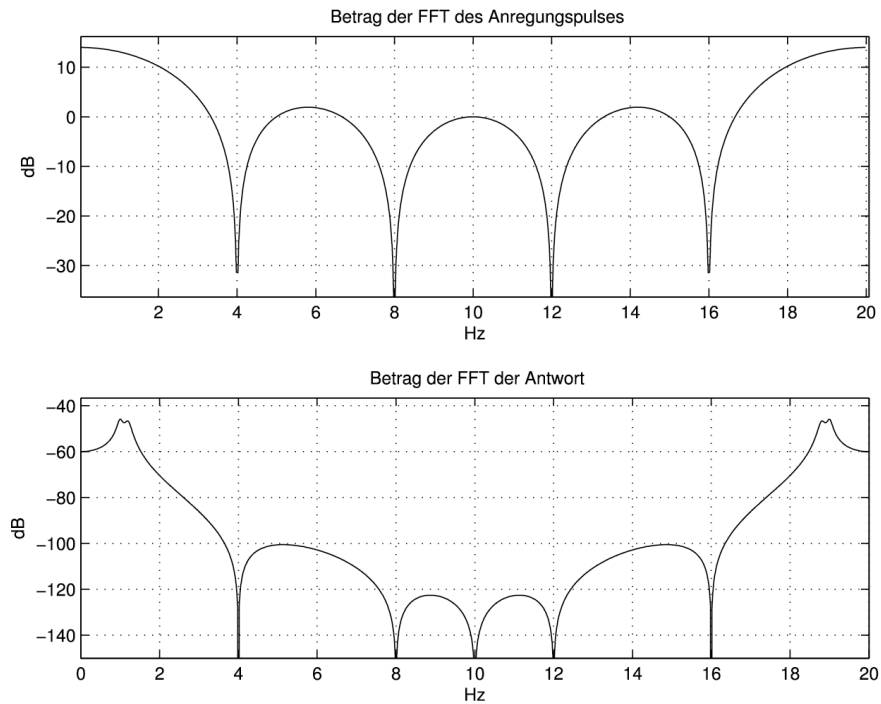

**Abb. 1.62:** Beträge der DFT des rechteckigen Anregungspulses und der Antwort (feder\_masse\_13.m)

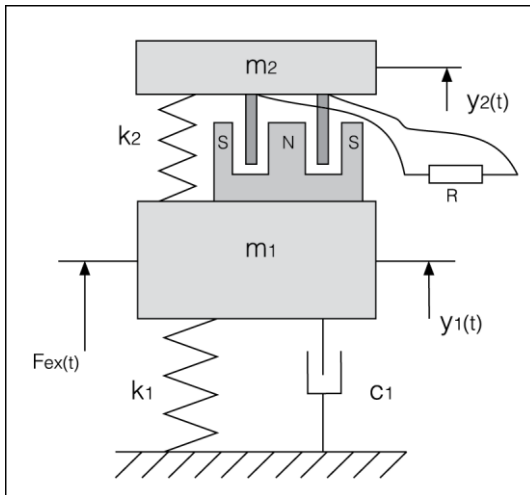

**Abb. 1.63:** Tilgung mit elektrischem Dämpfer

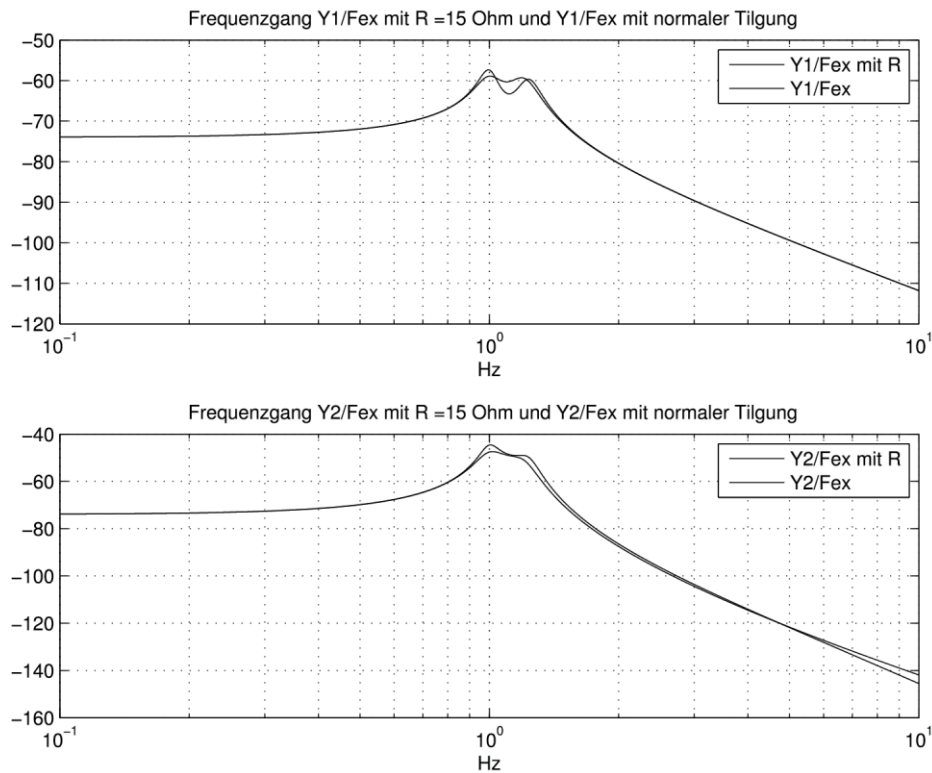

**Abb. 1.64:** Amplitudengänge für den elektrischen Tilger und den mechanischen Tilger (vibration\_control\_1.m)

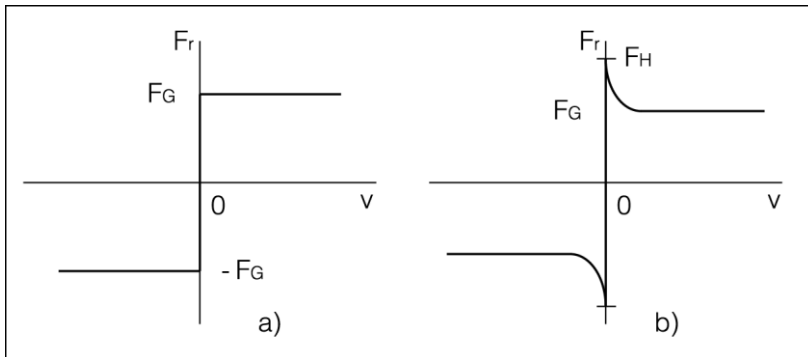

**Abb. 1.65:** a) Einfaches Modell der Gleitreibung b) Das Stribeck-Modell der Gleitreibung

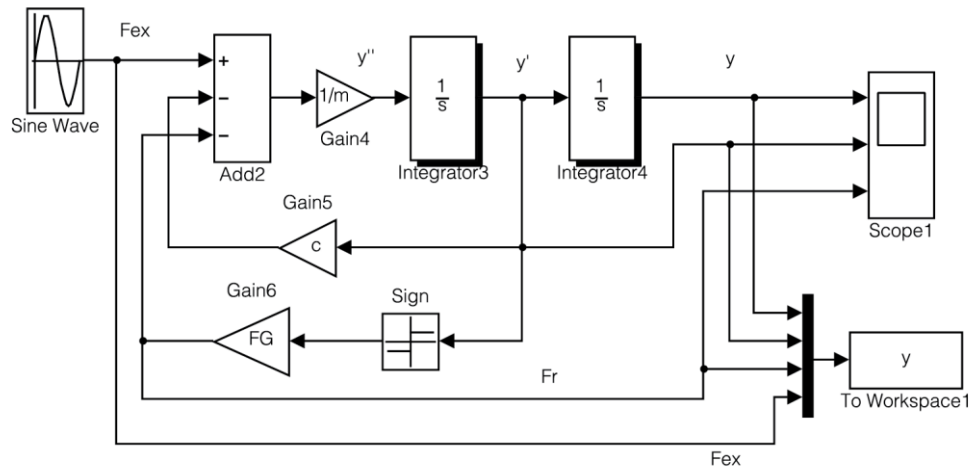

**Abb. 1.66:** Simulink-Modell des Systems mit Coulombsche Reibung (coulomb\_1.m, coulomb1.mdl)

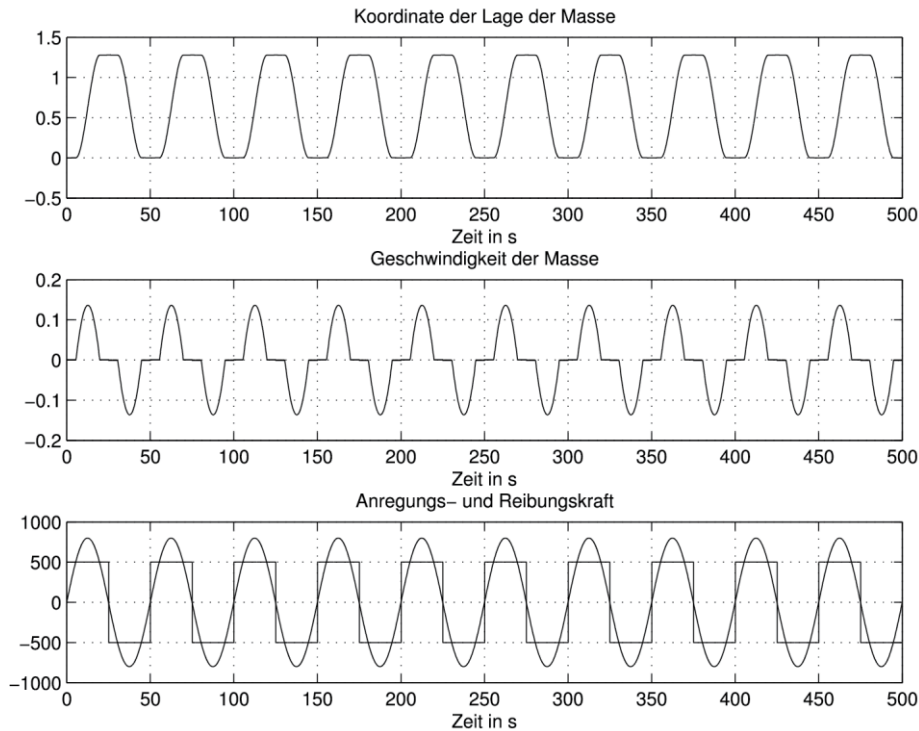

**Abb. 1.67:** a) Koordinate der Lage der Masse b) Geschwindigkeit der Masse c) Sinusförmige Anregungs- und Reibungskraft für fixe Schrittweite (coulomb\_1.m, coulomb1.mdl)



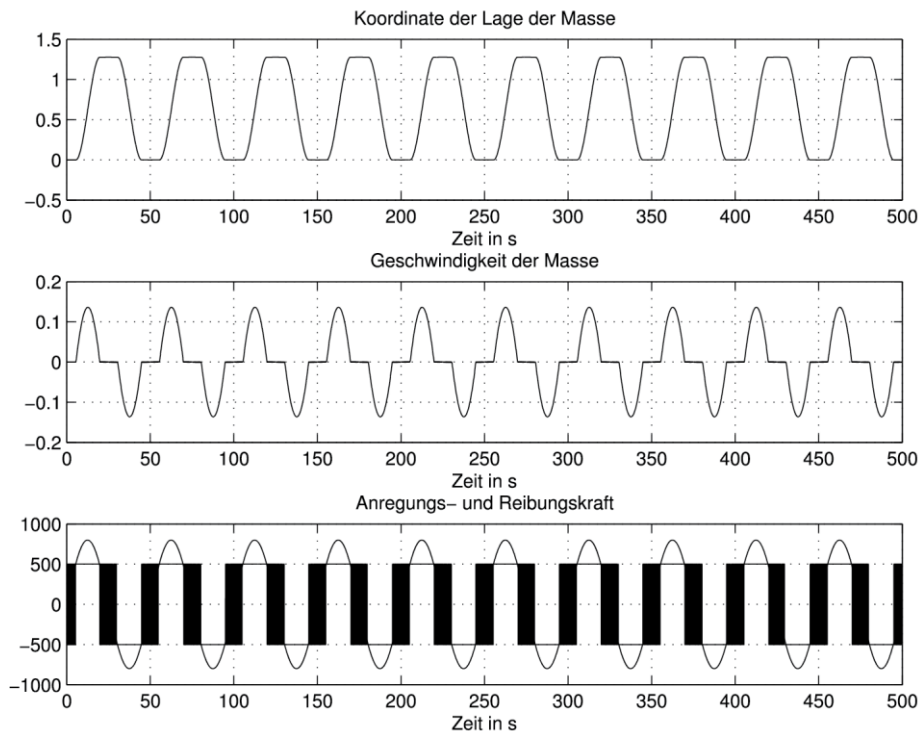

**Abb. 1.68:** a) Koordinate der Lage der Masse b) Geschwindigkeit der Masse c) Sinusförmige Anregungs- und Reibungskraft für variable Schrittweite (coulomb\_1.m, coulomb1.mdl)

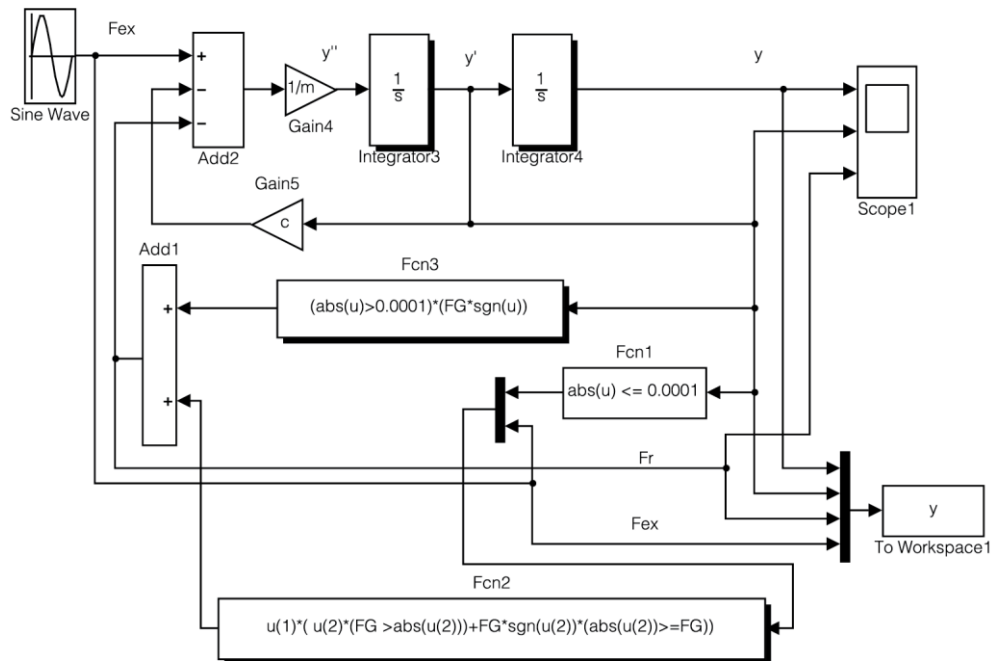

**Abb. 1.69:** Simulink-Modell mit Abfragen des Zustandes der Geschwindigkeit null (coulomb\_2.m, coulomb2.mdl)

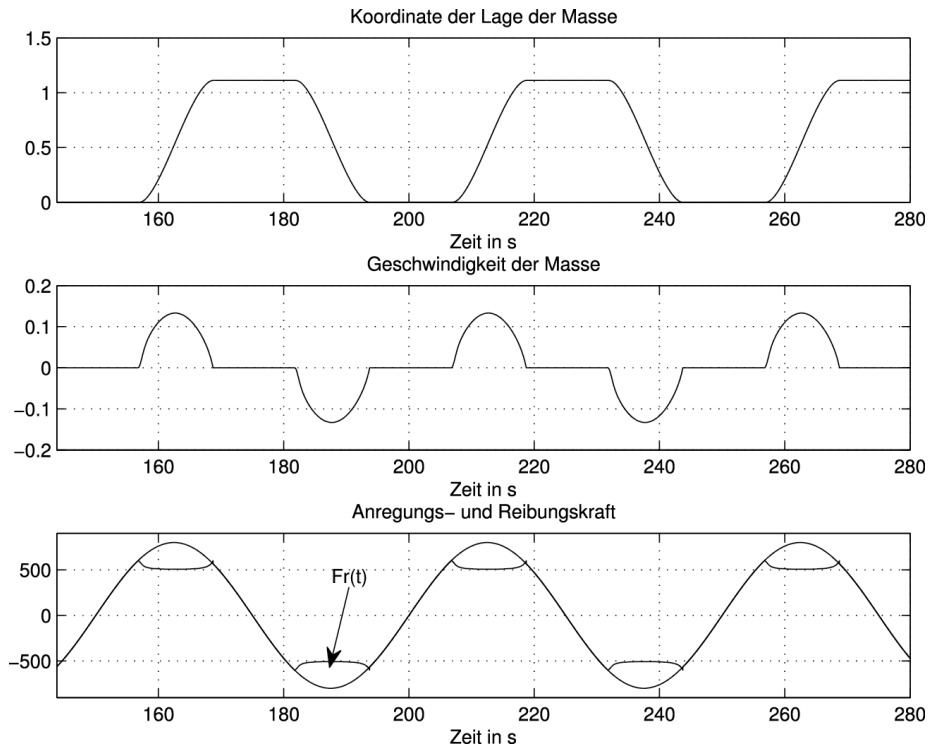

**Abb. 1.70:** a) Koordinate der Lage der Masse b) Geschwindigkeit der Masse c) Sinusförmige Anregungs- und Reibungskraft mit Stribeck-Kennlinie (coulomb\_3.m, coulomb3.mdl)

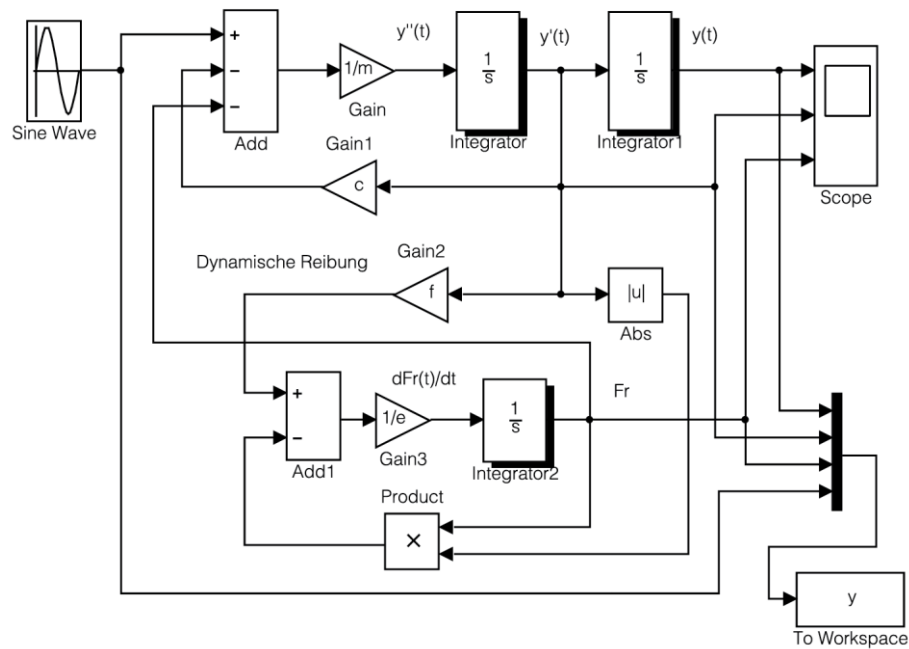

**Abb. 1.71:** Simulink-Modell des Systems mit Dahl-Reibungskraft (coulomb\_5.m, coulomb5.mdl)

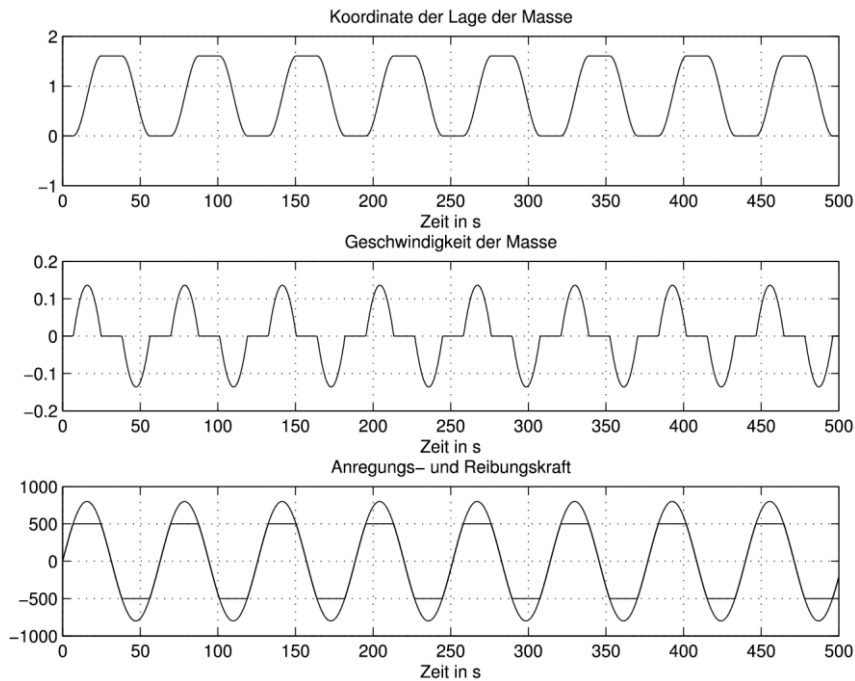

**Abb. 1.72:** Ergebnisse der Simulation mit Dahl-Reibungskraft (coulomb\_5.m, coulomb5.mdl)

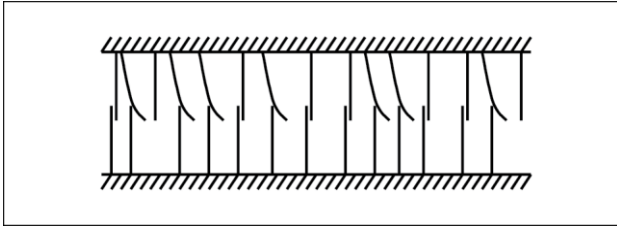

**Abb. 1.73:** Die Reibungskontakte zwischen zwei Flächen in Form von Borsten

| Parameter  | Wert            | Einheiten |
|------------|-----------------|-----------|
| $\sigma_0$ | 100000          | [N/m]     |
| $\sigma_1$ | $\sqrt{100000}$ | [Ns/m]    |
| $\sigma_2$ | 0,4             | [Ns/m]    |
| $F_c$      | 1               | [N]       |
| $F_s$      | 1,5             | [N]       |
| $v_s$      | 0,001           | [m/s]     |

**Tabelle 1.1:** Beispiel für die Parameter des Modells

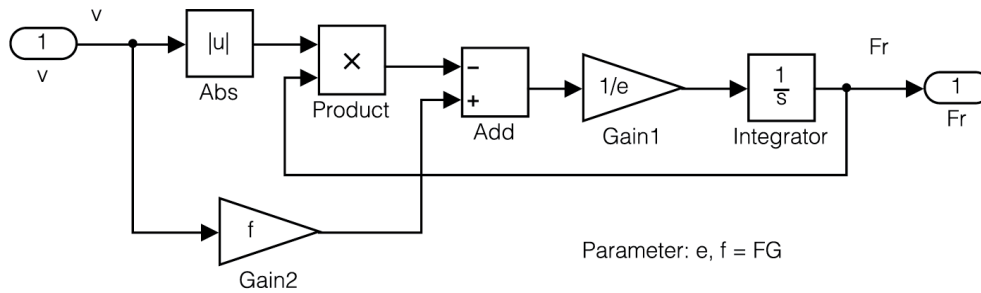

**Abb. 1.74:** Das Dahl-Modell (dynamische\_modelle.mdl)



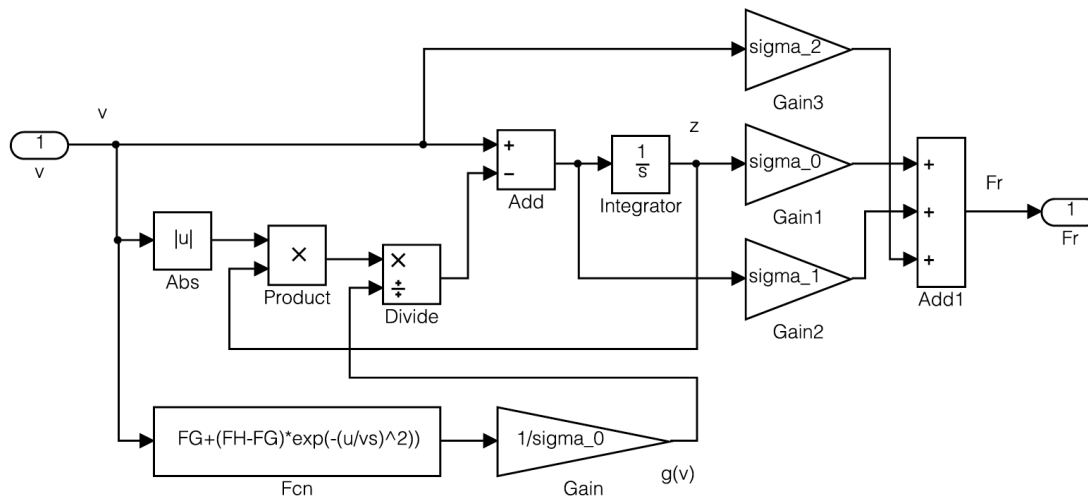

**Abb. 1.75:** Das LuGre-Modell (dynamische\_modelle.mdl)

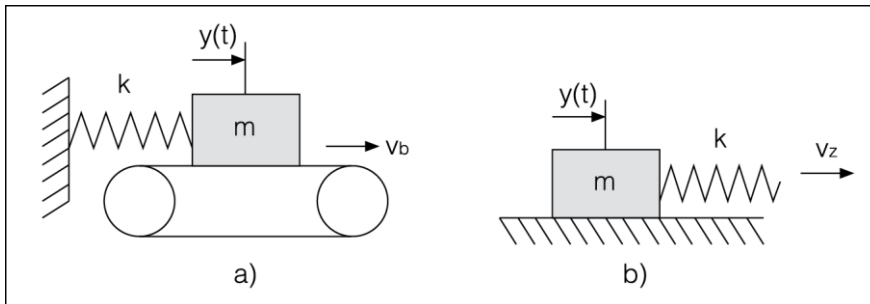

**Abb. 1.76:** Systeme mit Slip-Stick-Verhalten

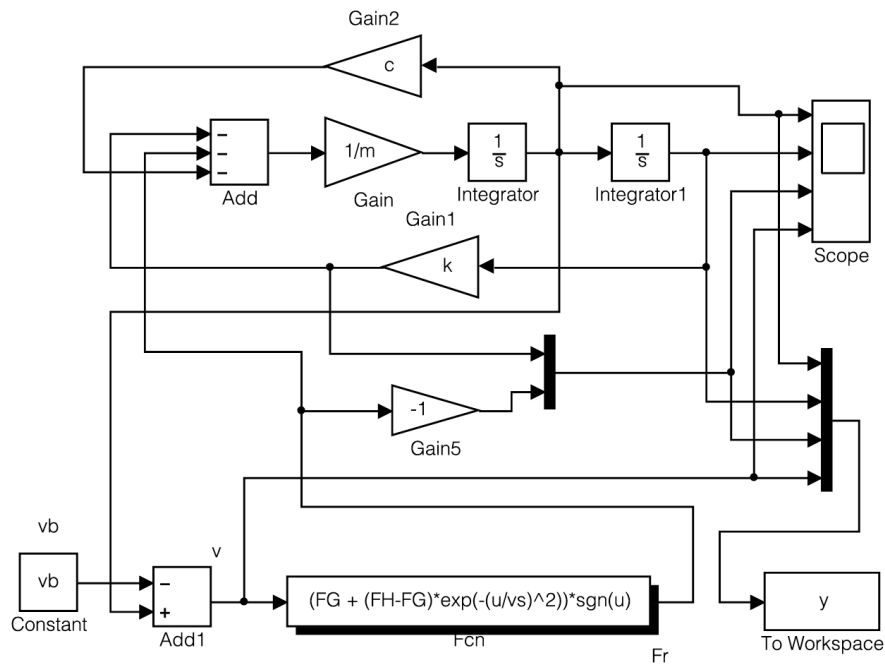

**Abb. 1.77:** Simulink-Modell für das erste System mit Stribeck-Reibungskraft (slip\_stick\_3.m, slip\_stick3.mdl)

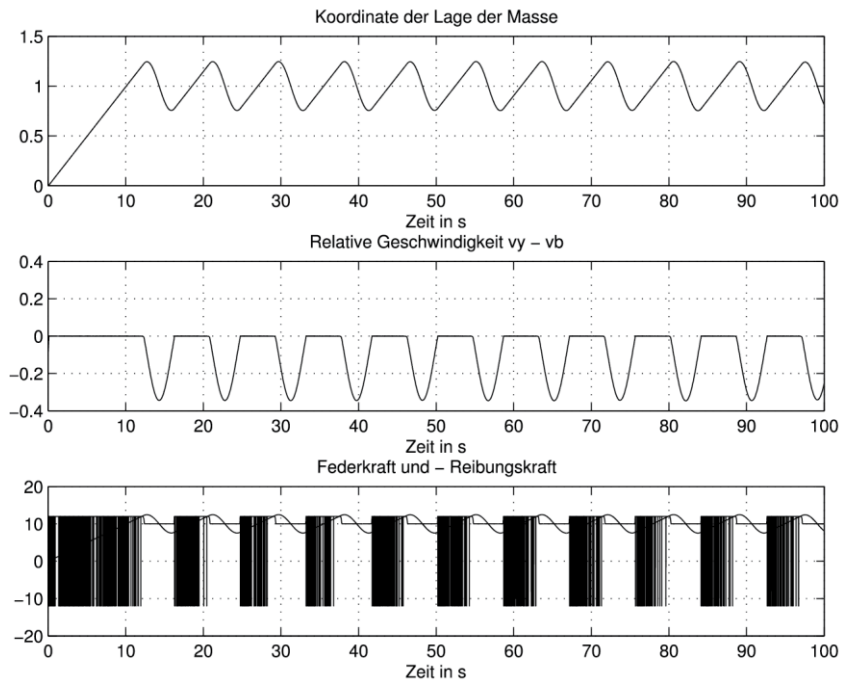

**Abb. 1.78:** Ergebnisse für eine Reibungskraft nach Stribeck-Kennlinie (slip\_stick\_3.m, slip\_stick3.mdl)

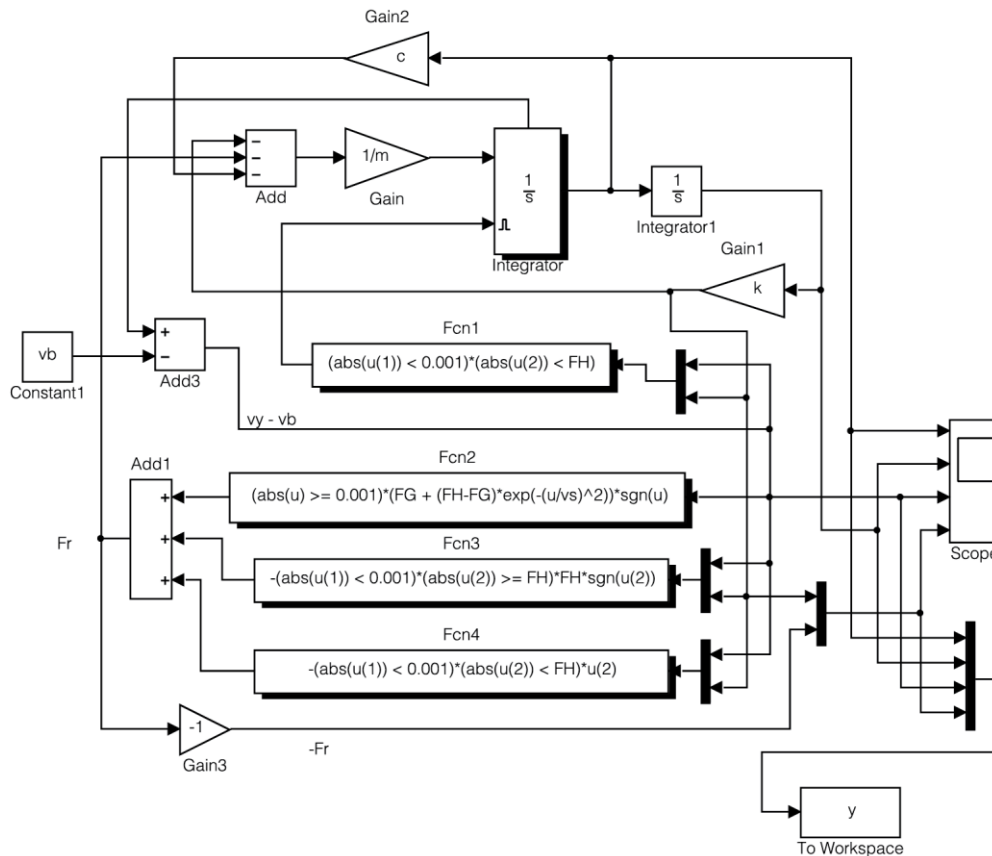

**Abb. 1.79:** Simulink-Modell für das erste System mit Stribeck-Reibungskraft und Zustandsabfragen (slip\_stick 31.m, slip\_stick31.mdl)

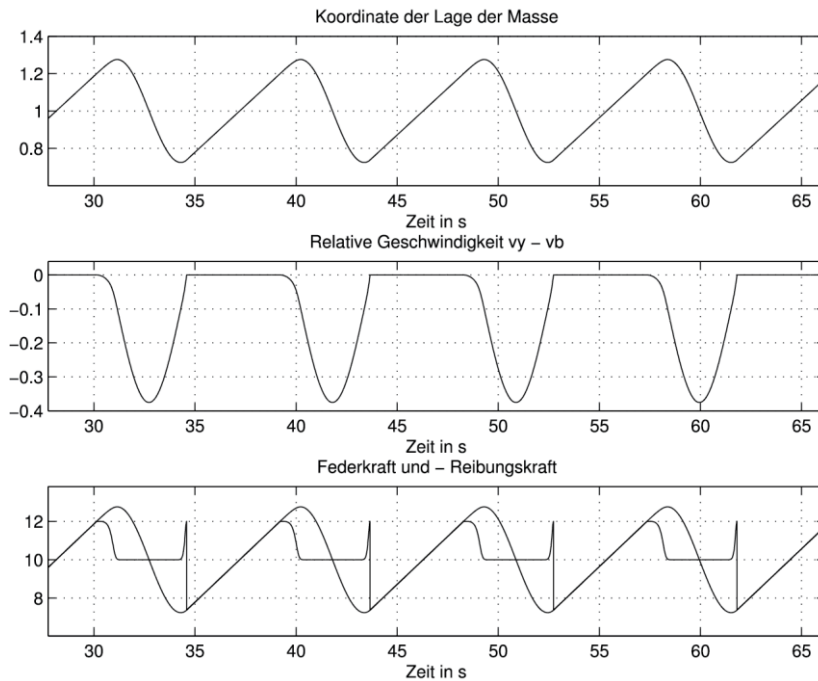

**Abb. 1.80:** Ergebnisse der Simulation mit gesteuertem Integrator und Abfragen im Haftzustand (slip\_stick\_31.m, slip\_stick31.mdl)

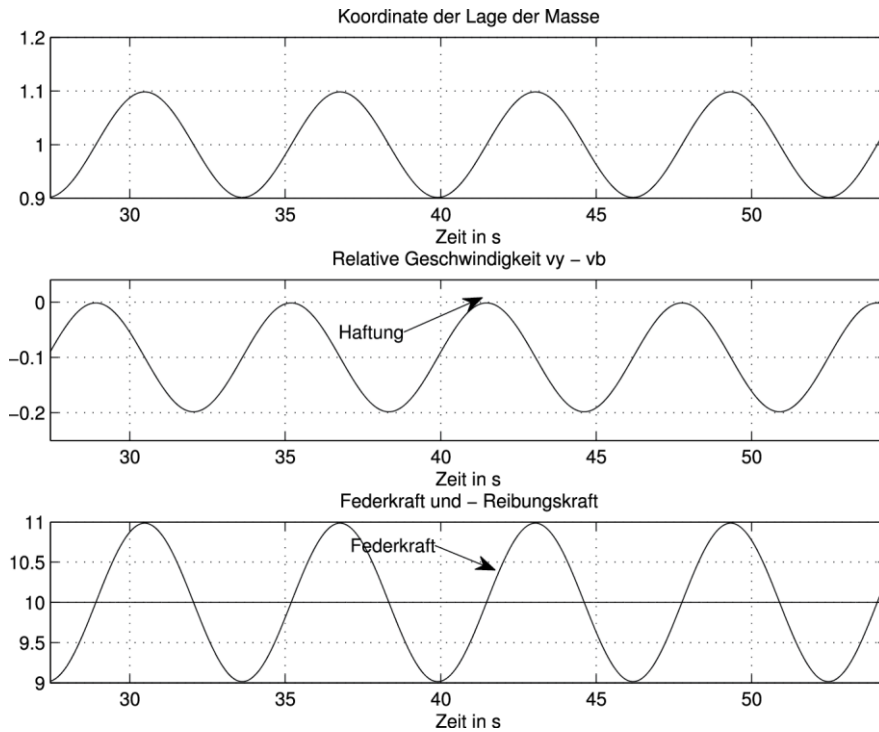

**Abb. 1.81:** Ergebnisse der Simulation mit Dahl-Reibungskraftmodell (slip\_stick\_s\_1.m, slip\_stick\_s1.mdl)

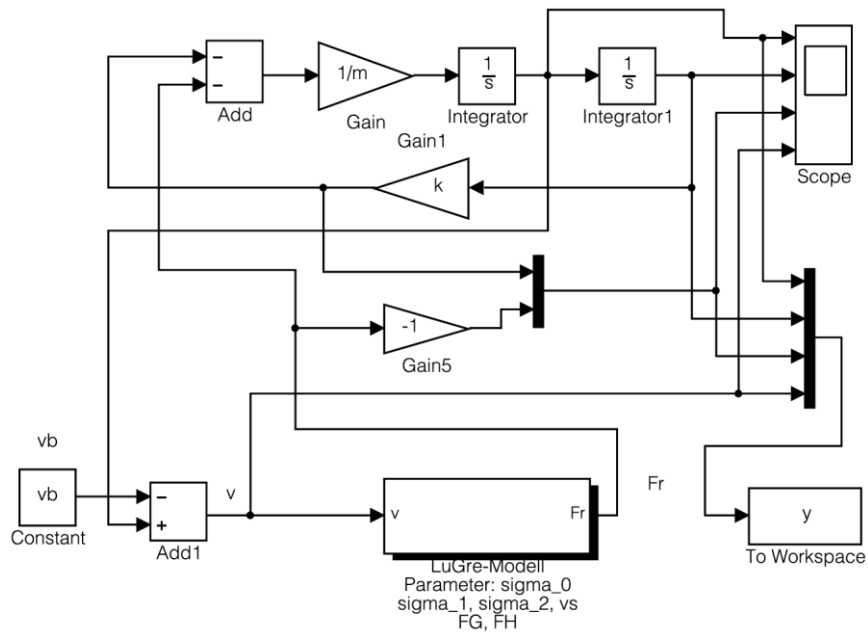

**Abb. 1.82:** Simulink-Modell mit LuGre-Reibungskraftmodell (slip\_stick\_s\_1.m, slip\_stick\_s1.mdl)



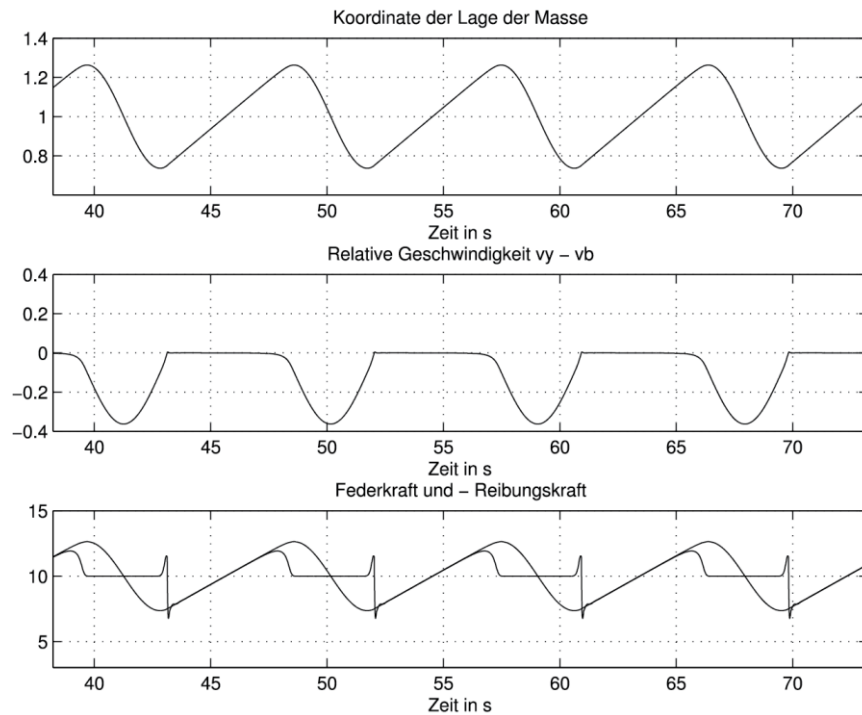

**Abb. 1.83:** Ergebnisse der Simulation mit LuGre-Reibungskraftmodell (slip\_stick\_s\_12.m, slip\_stick\_s12.mdl)

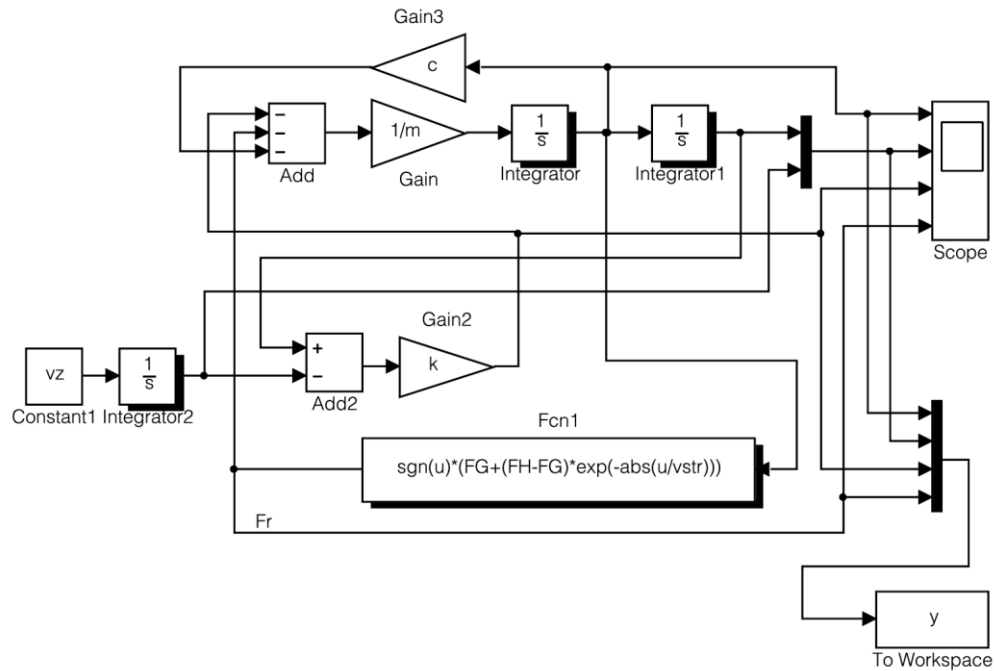

**Abb. 1.84:** Simulink-Modell des Systems aus Abb. 1.76b (slip\_stick\_1.m, slip\_stick1.mdl)

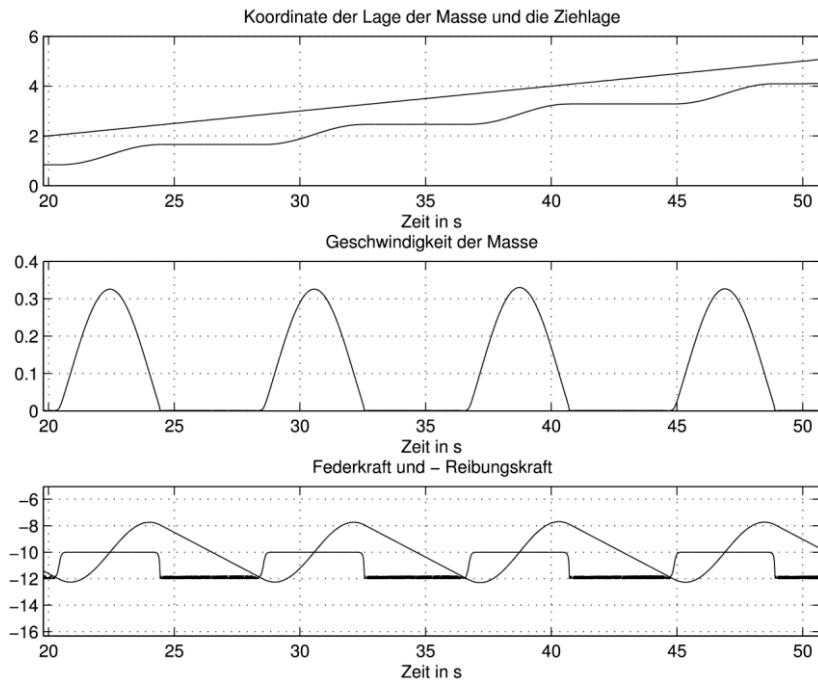

**Abb. 1.85:** Ergebnisse der Simulation mit Stribeck-Kennlinie für die Reibungskraft (slip\_stick\_1.m, slip\_stick1.mdl)

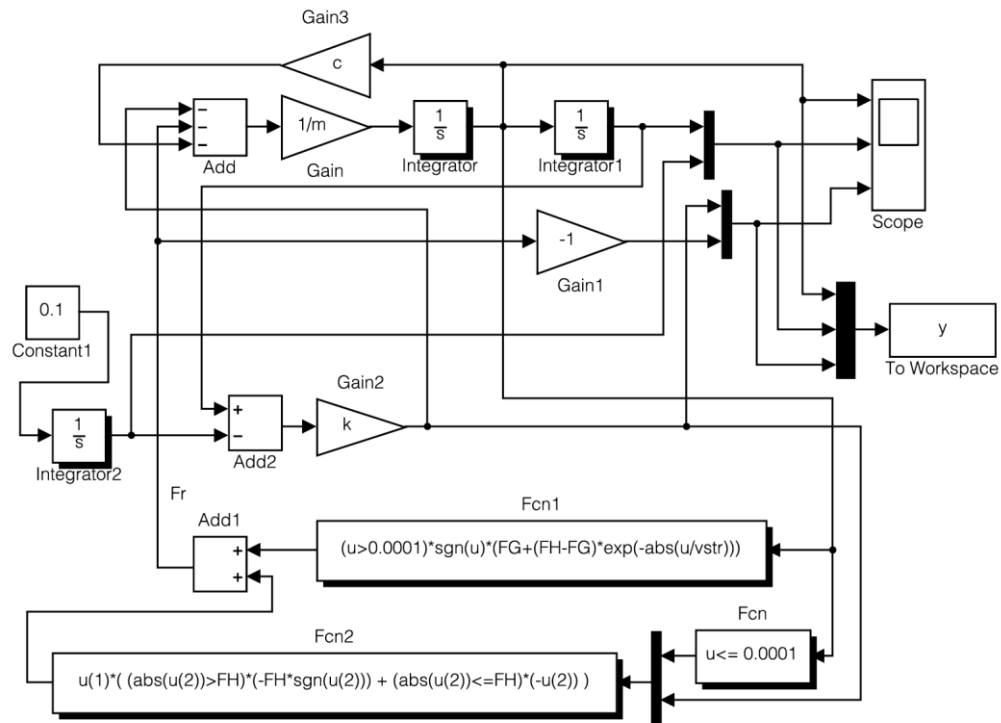

**Abb. 1.86:** Simulink-Modell des Systems aus Abb. 1.76b mit Definition der Reibungskraft im Haftzustand (slip\_stick\_2.m, slip\_stick2.mdl)

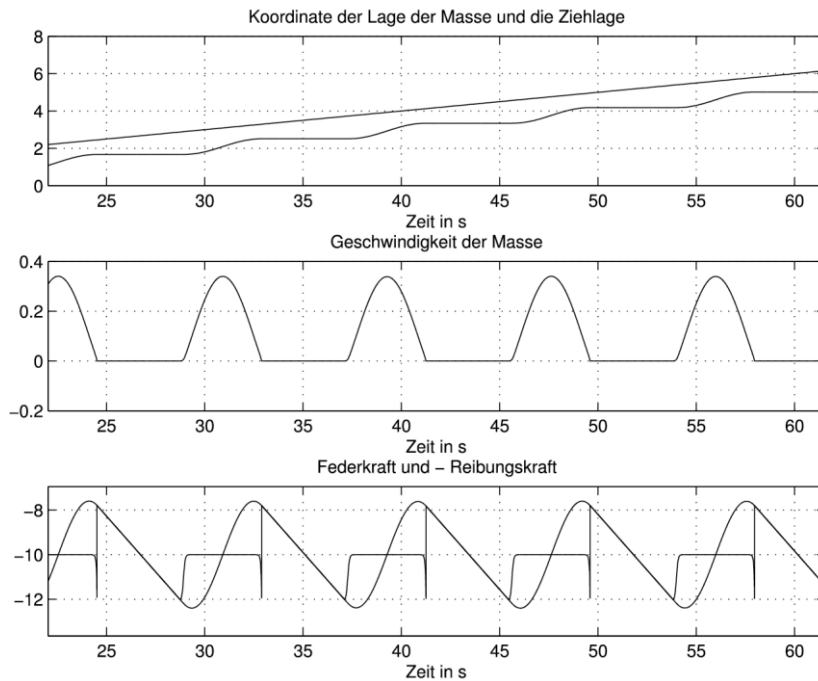

**Abb. 1.87:** Ergebnisse der Simulation mit Definition der Reibungskraft im Haftzustand (slip\_stick\_1.m, slip\_stick1.mdl)

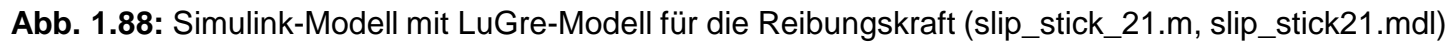

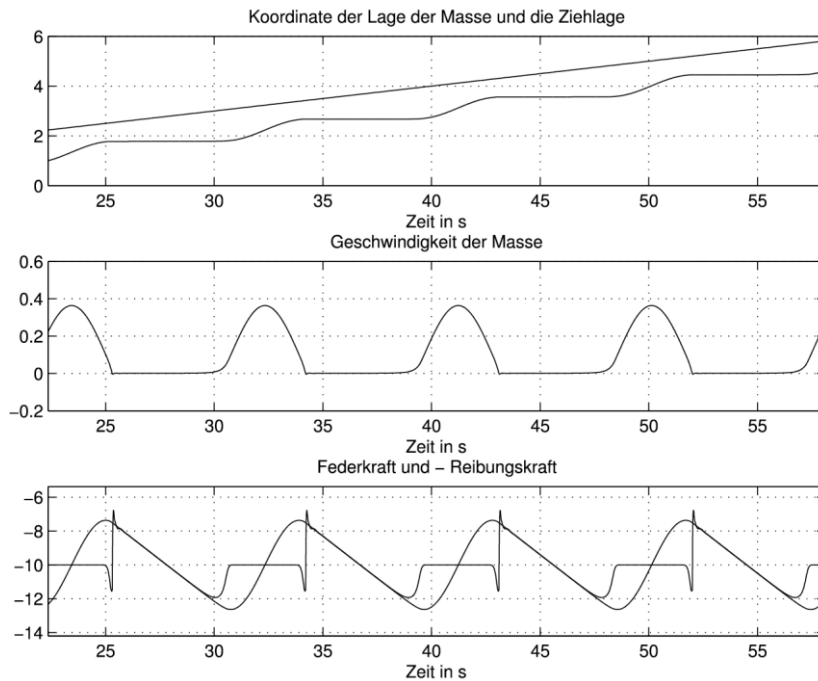

**Abb. 1.89:** Ergebnisse der Simulation mit LuGre-Modell für die Reibungskraft (slip\_stick\_21.m, slip\_stick21.mdl)

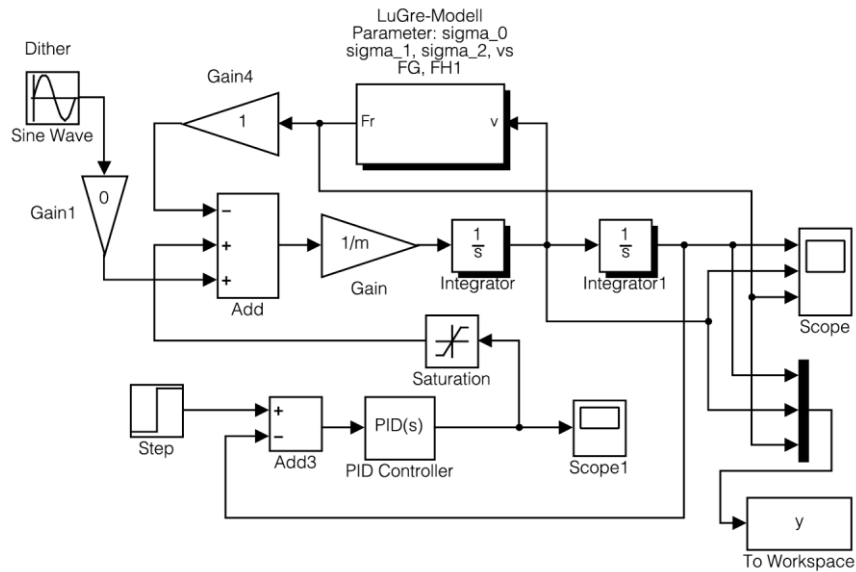

**Abb. 1.90:** Simulink-Modell der Positionsregelung (position\_reg\_1.m, position\_reg1.mdl)



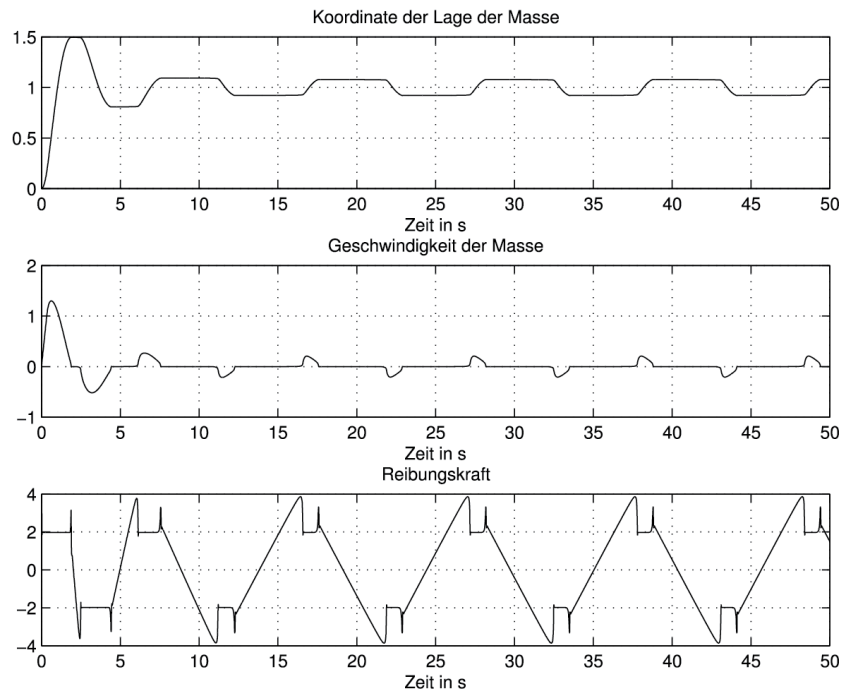

**Abb. 1.91:** Ergebnisse der Positionsregelung (position\_reg\_1.m, position\_reg1.mdl)

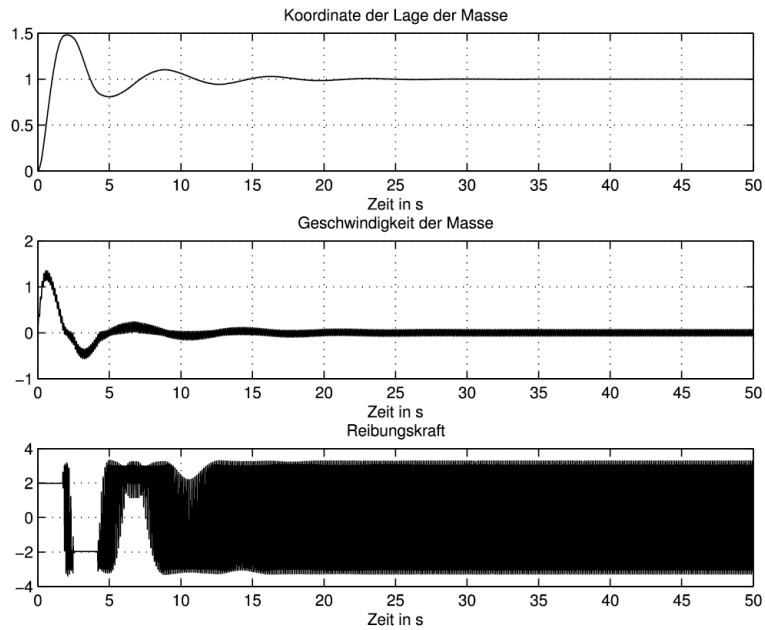

**Abb. 1.92:** Ergebnisse der Positionsregelung mit Dither-Signal (position\_reg\_1.m, position\_reg1.mdl)

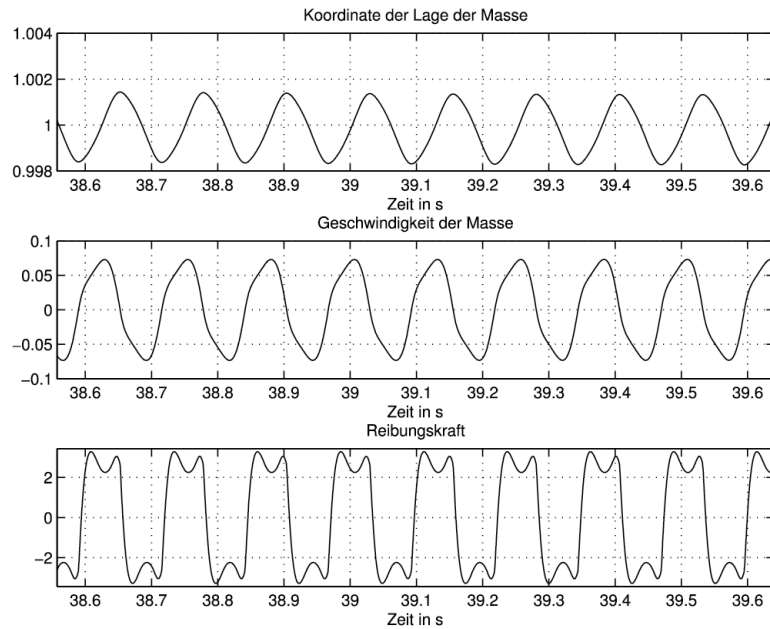

**Abb. 1.93:** Ergebnisse der Positionsregelung mit Dither-Signal (Ausschnitt) (position\_reg\_1.m, position\_reg1.mdl)

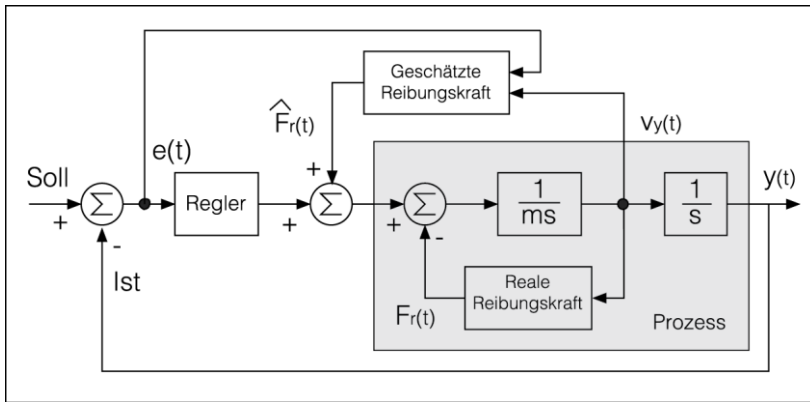

**Abb. 1.94:** Blockschema der Modell-Basierte-Reibungskompensation (position\_reg\_1.m, position\_reg1.mdl)

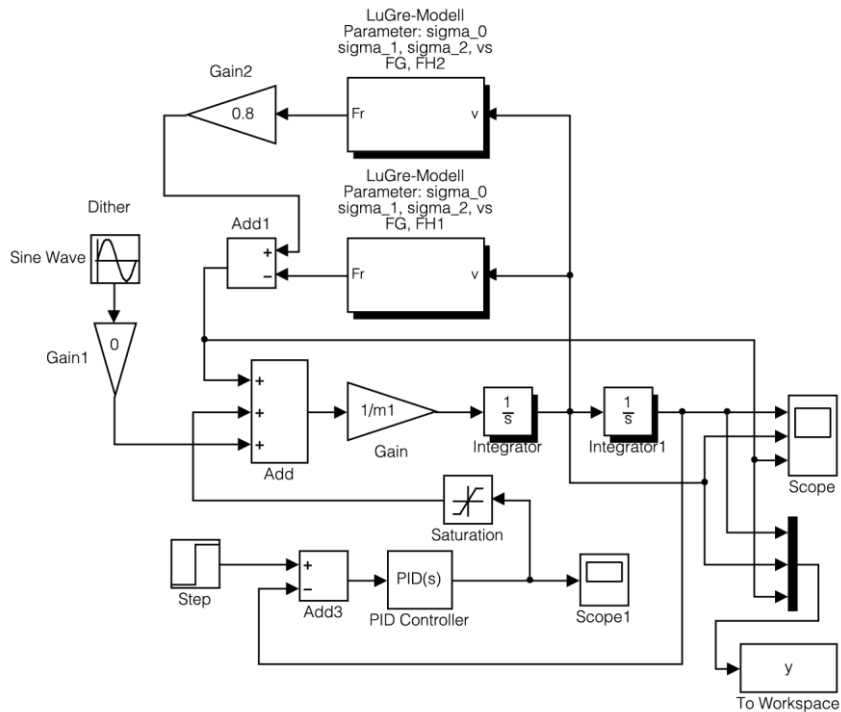

**Abb. 1.95:** Einfaches Simulink-Modell der Modell-Basierten-Reibungskompensation (position\_reg\_2.m, position\_reg2.mdl)

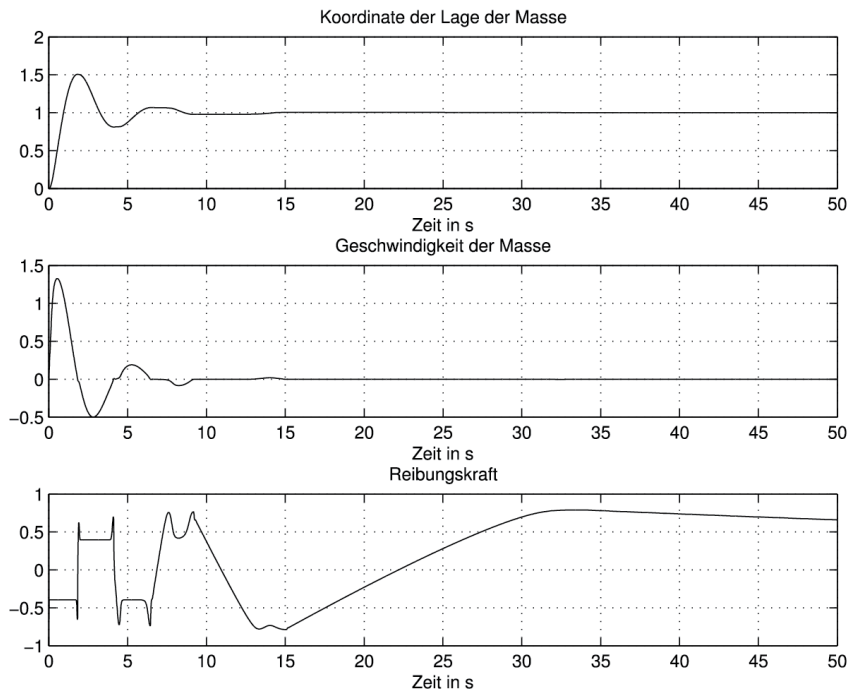

**Abb. 1.96:** Ergebnisse der Modell-Basierten-Reibungskompensation (position\_reg\_2.m, position\_reg2.mdl)

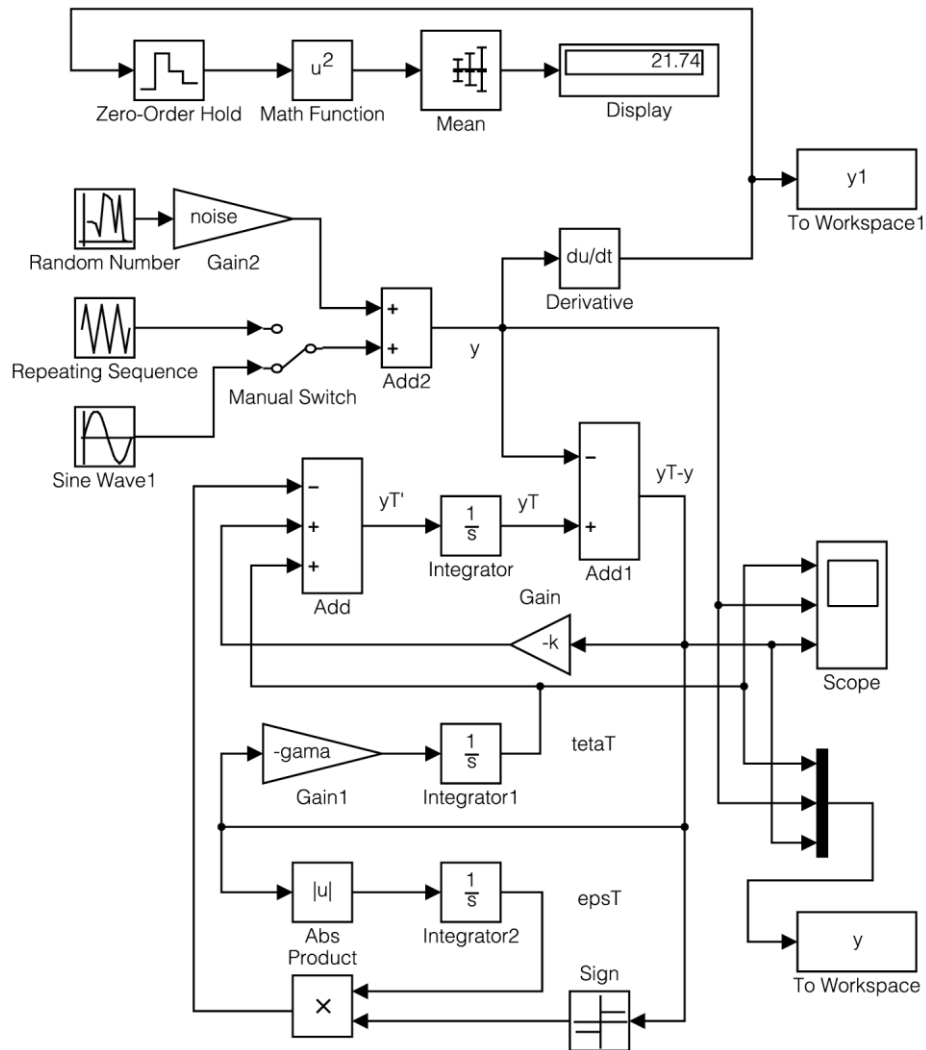

**Abb. 1.97:** Simulink-Modell zur Untersuchung des Beobachters (diff\_filter\_1.m, diff\_filter1.mdl)

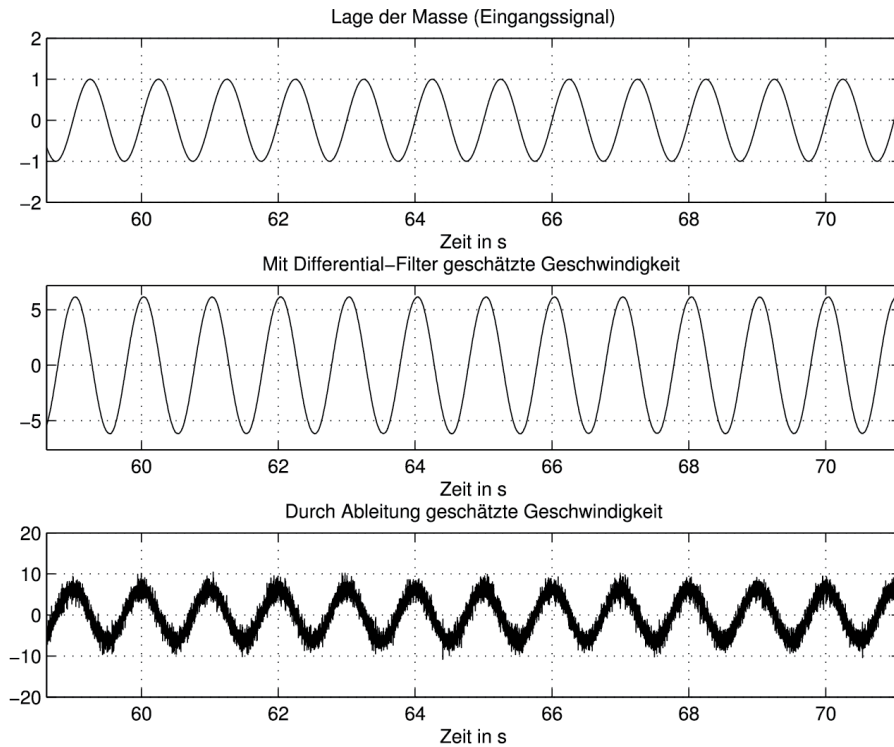

**Abb. 1.98:** Ergebnisse der Simulation des Beobachters für sinusförmige Anregung (Ausschnitt)  
(diff\_filter\_1.m, diff\_filter1.mdl)



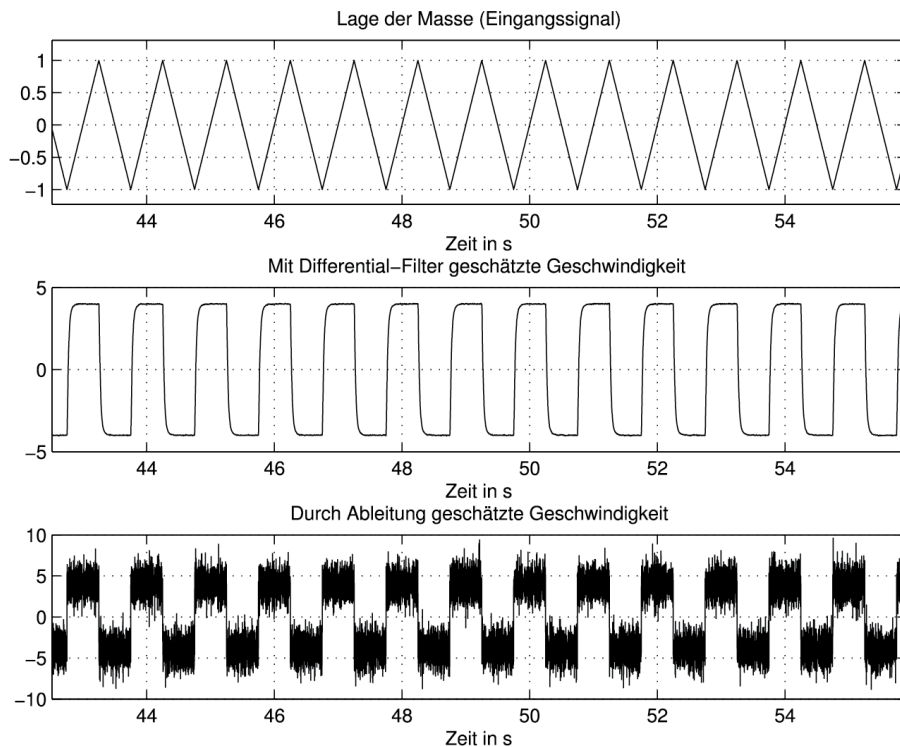

**Abb. 1.99:** Ergebnisse der Simulation des Beobachters für dreieckige Anregung (Ausschnitt)  
(diff\_filter\_1.m, diff\_filter1.mdl)

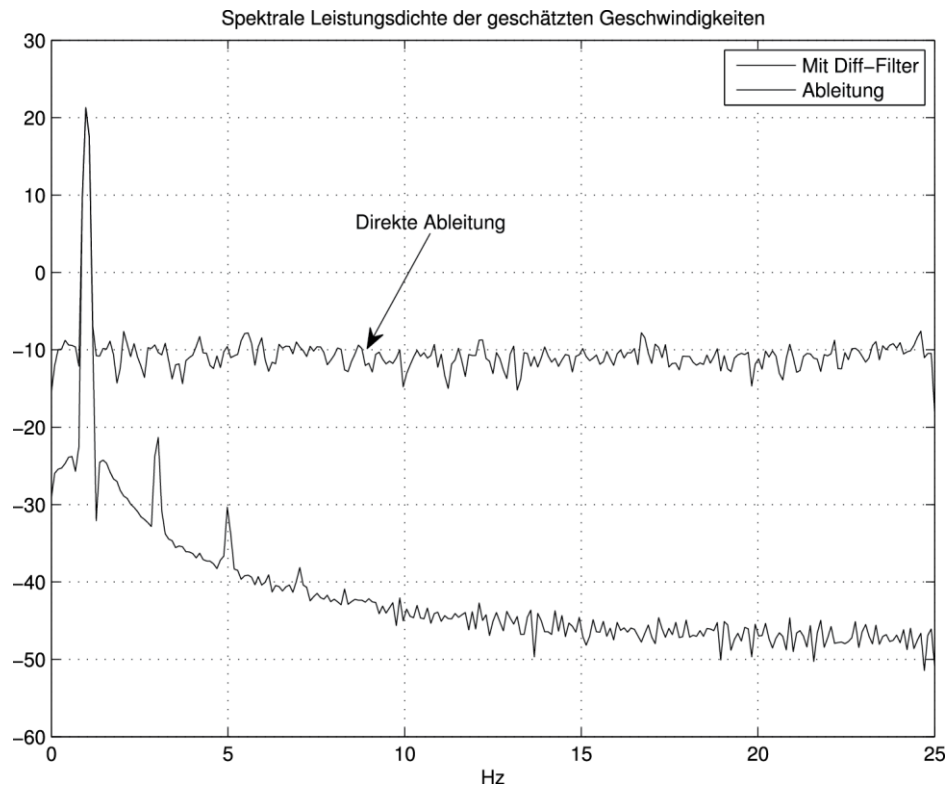

**Abb. 1.100:** Spektrale Leistungsdichten der geschätzten Geschwindigkeiten für sinusförmige Anregung (diff\_filter\_1.m, diff\_filter1.mdl)

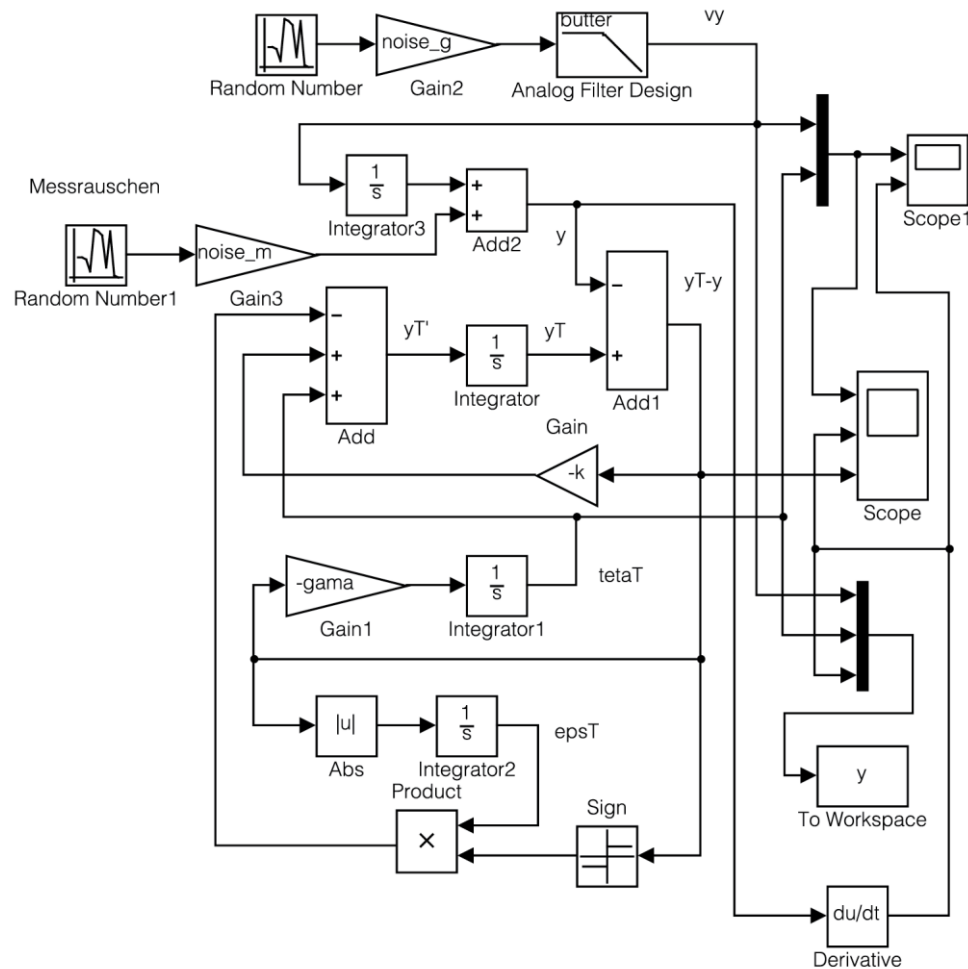

**Abb. 1.101:** Simulink-Modell für die Untersuchung des Beobachters mit bandbegrenztem Signal (diff\_filter\_2.m, diff\_filter2.mdl)

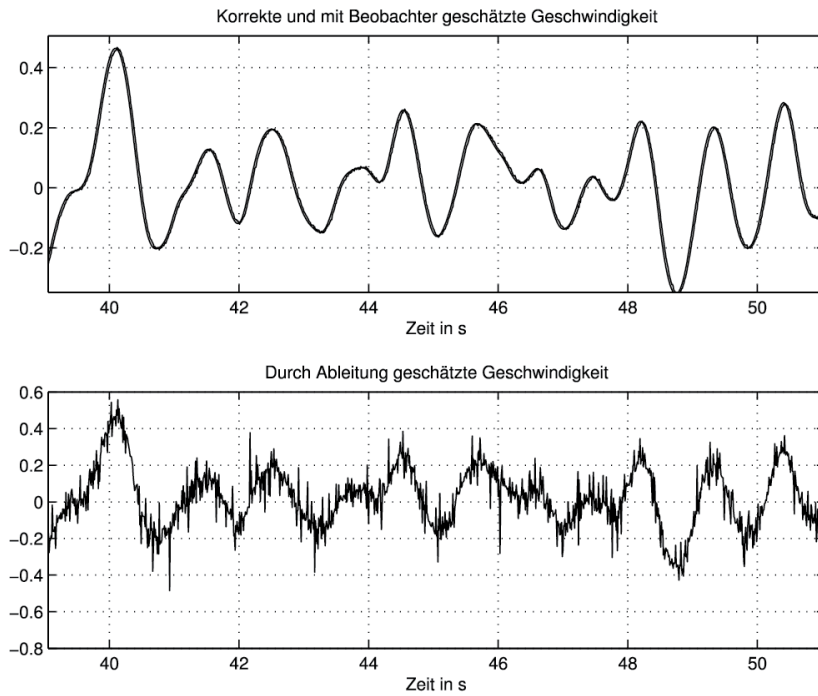

**Abb. 1.102:** Ergebnisse für eine Bandbreite von 1 Hz und Schrittweite der Simulation von 0,01 s (diff\_filter\_2.m, diff\_filter2.mdl)

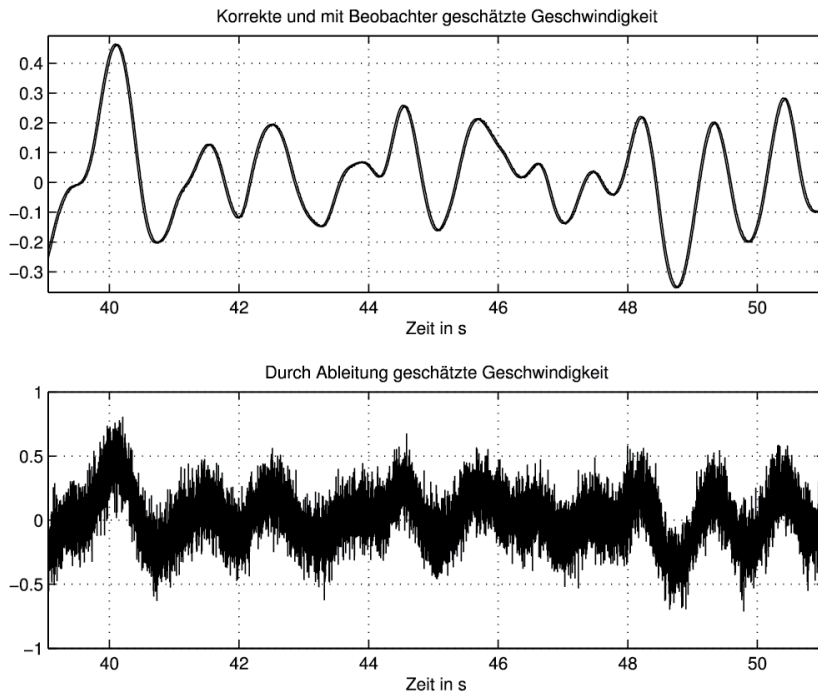

**Abb. 1.103:** Ergebnisse für eine Bandbreite von 1 Hz und Schrittweite der Simulation von 0,001 s (diff\_filter\_2.m, diff\_filter2.mdl)

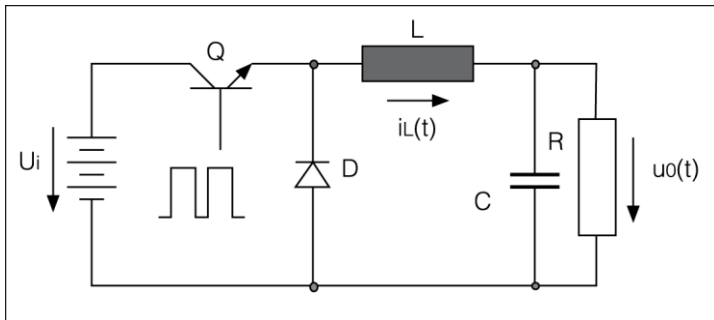

**Abb. 2.1:** Schaltung des Abwärtswandler (Buck-Wandlers)

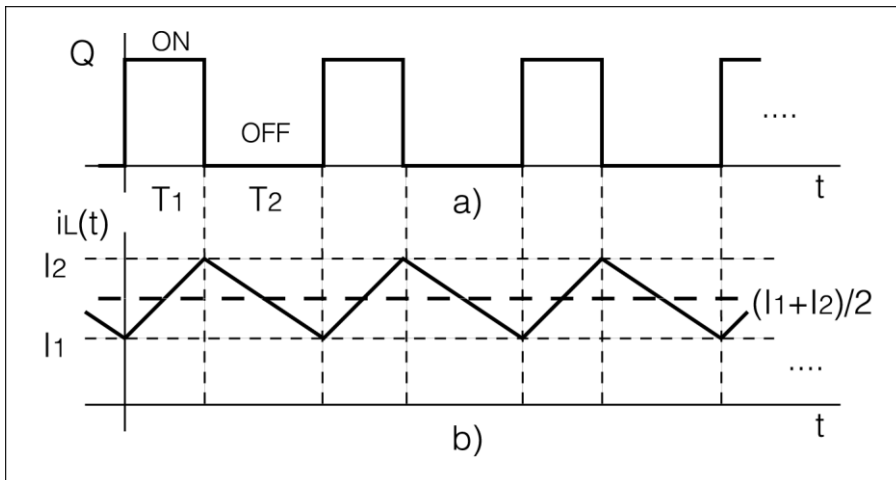

**Abb. 2.2:** Strom der Induktivität für  $C \rightarrow \infty$

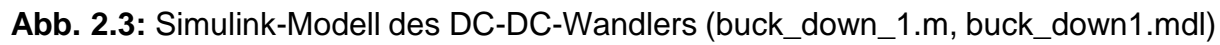



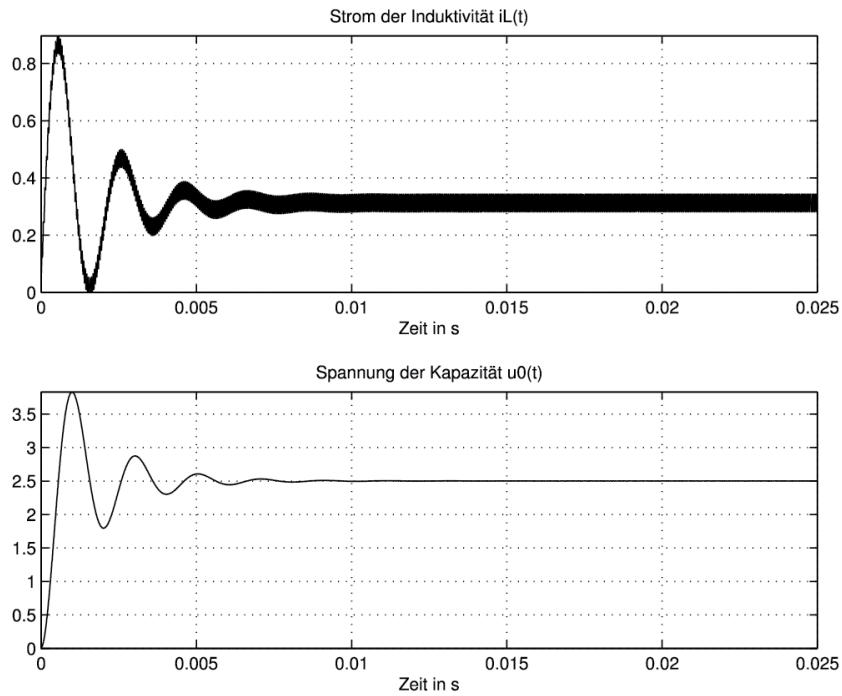

**Abb. 2.4:** Strom  $i_L(t)$  und Spannung  $u_0(t)$  des DC-DC-Wandlers (buck down\_1.m)

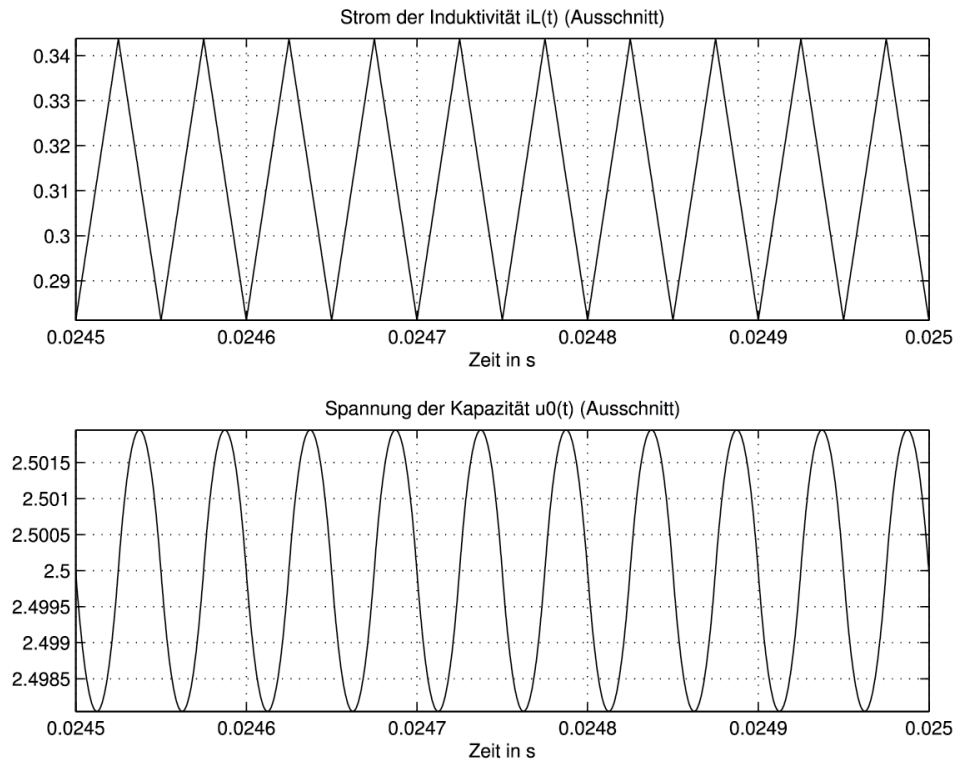

**Abb. 2.5:** Strom  $i_L(t)$  und Spannung  $u_0(t)$  des DC-DC-Wandlers (Ausschnitt) (buck\_down\_1.m)

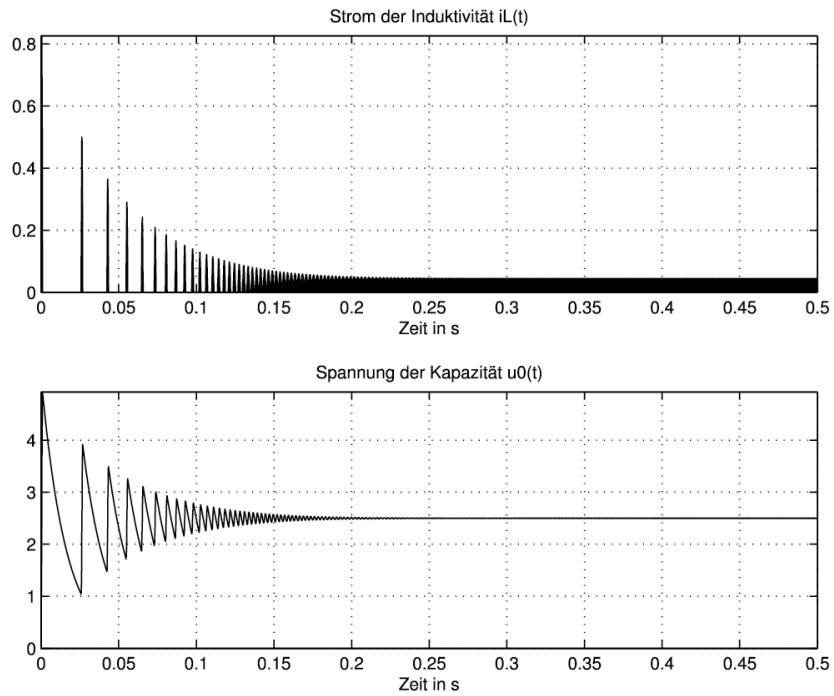

**Abb. 2.6:** Strom  $i_L(t)$  und Spannung  $u_0(t)$  des DC-DC-Wandlers im lückenbehafteten Betrieb (buck\_down\_1.m)

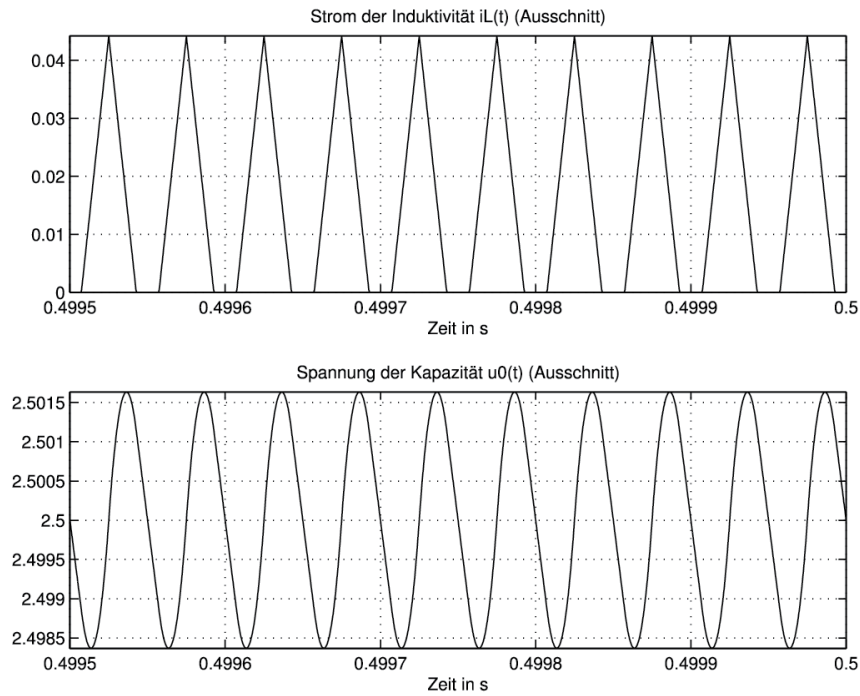

**Abb. 2.7:** Strom  $i_L(t)$  und Spannung  $u_0(t)$  des DC-DC-Wandlers im lückenbehafteten Betrieb (Ausschnitt) (buck\_down\_1.m)

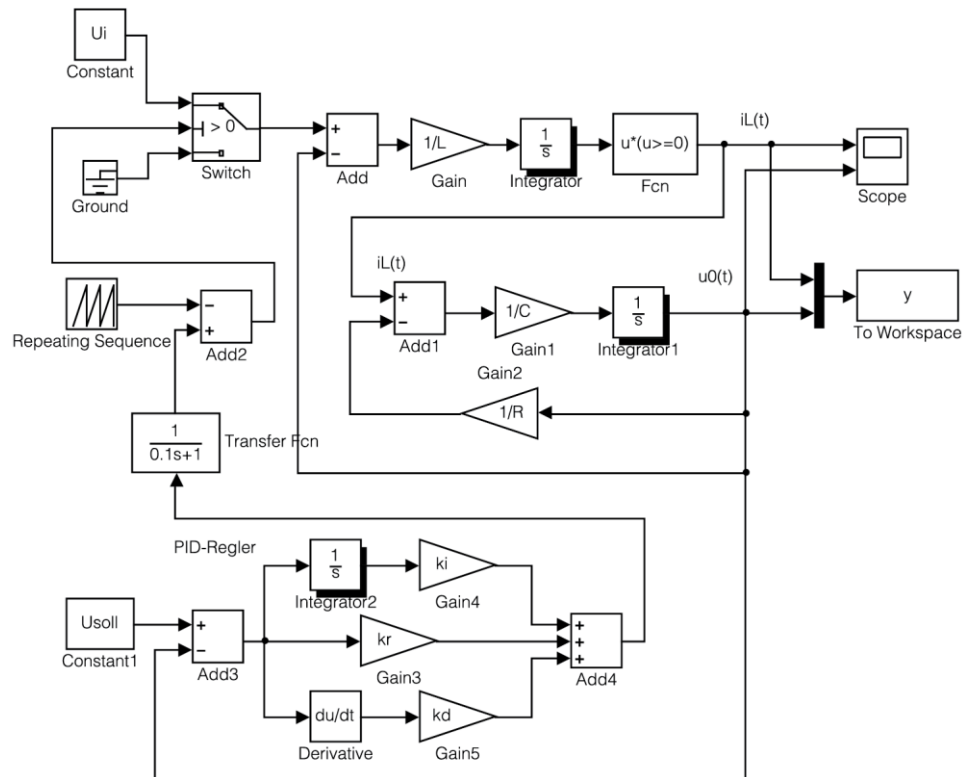

**Abb. 2.8:** Simulink-Modell des DC-DC-Wandlers mit PID-Spannungsregler (buck\_down\_2.m, buck\_down2.mdl)

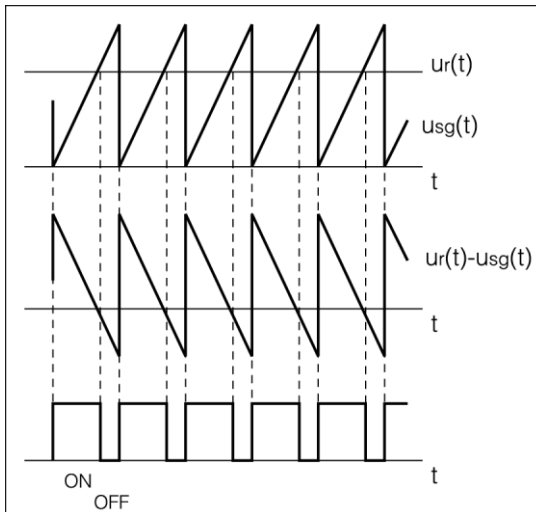

**Abb. 2.9:** Steuerung des Tastverhältnisses über die Spannung  $u_r(t)$  (buck\_down\_2.m, buck\_down2.mdl)

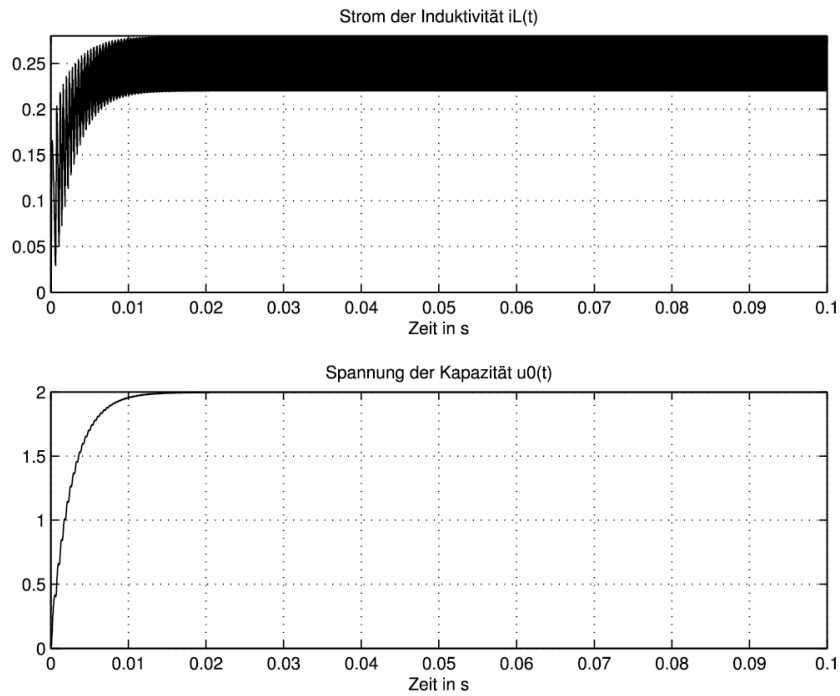

**Abb. 2.10:** Einschwingen der Variablen für eine Sollspannung von 2 V (buck\_down\_2.m, buck\_down2.mdl)

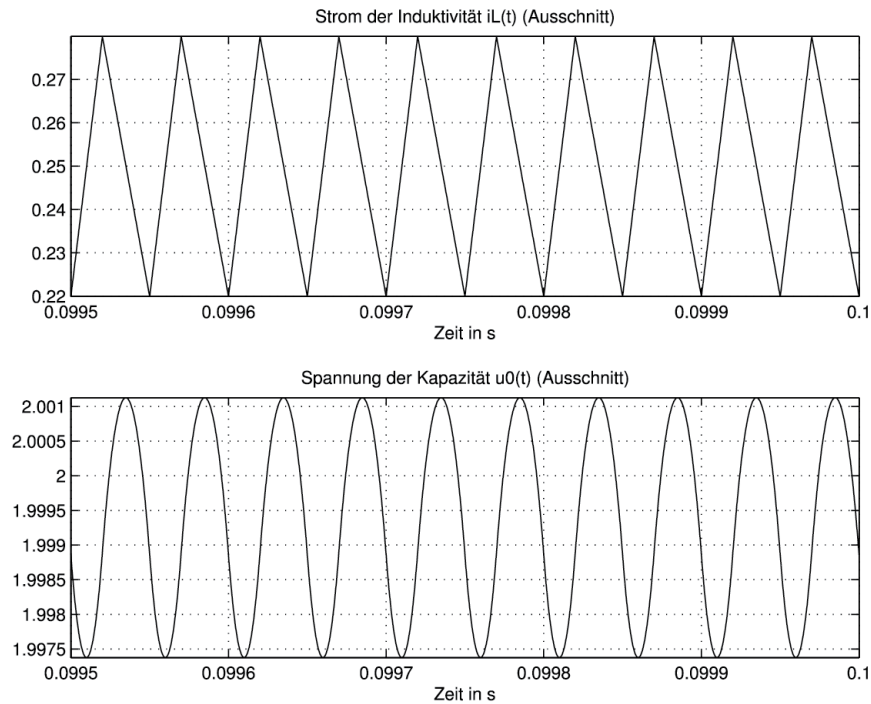

**Abb. 2.11:** Der Strom  $i_L(t)$  und Spannung  $u_0(t)$  für eine Sollspannung von 2 V im stationären Zustand (buck\_down\_2.m, buck\_down2.mdl)



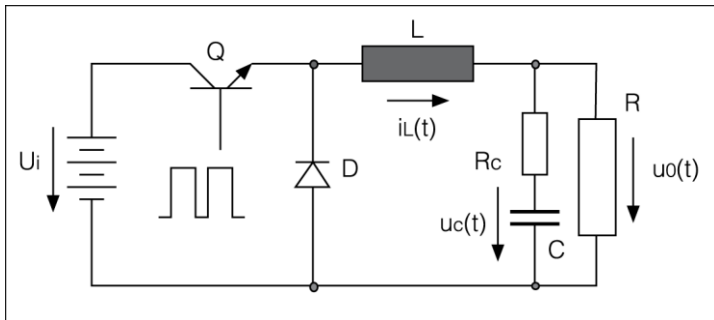

**Abb. 2.12:** *Step-Down-Wandler* mit nicht idealem Kondensator

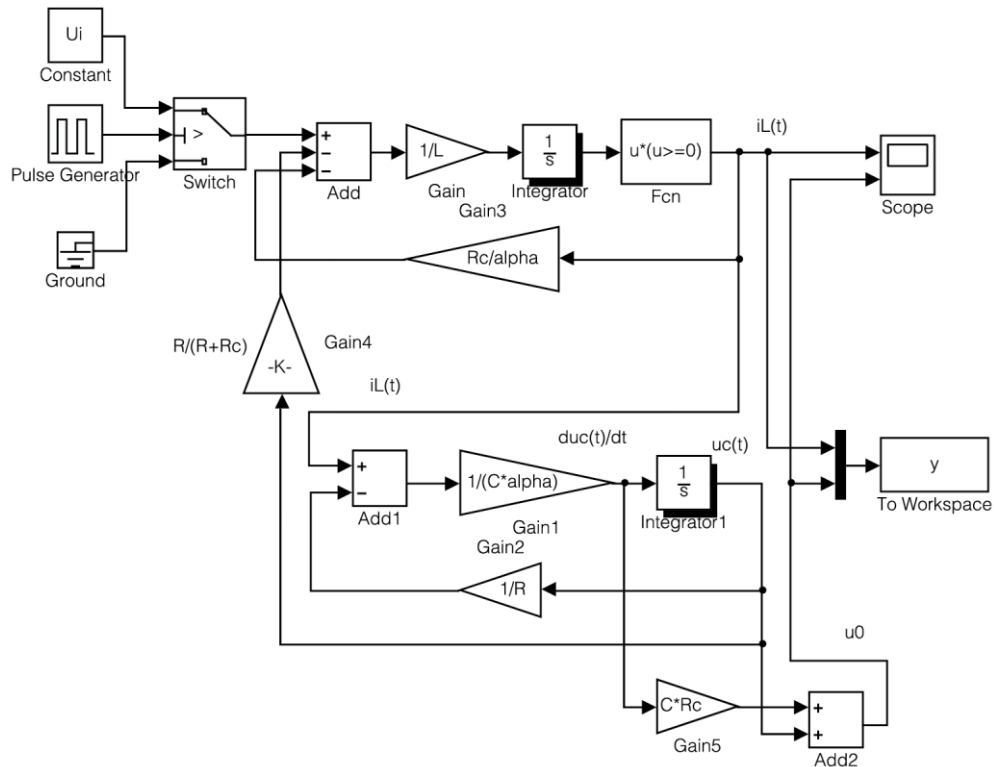

**Abb. 2.13:** Simulink-Modell des Wandlers mit nicht idealem Kondensator (buck\_down3.m, buck\_down\_3.mdl)

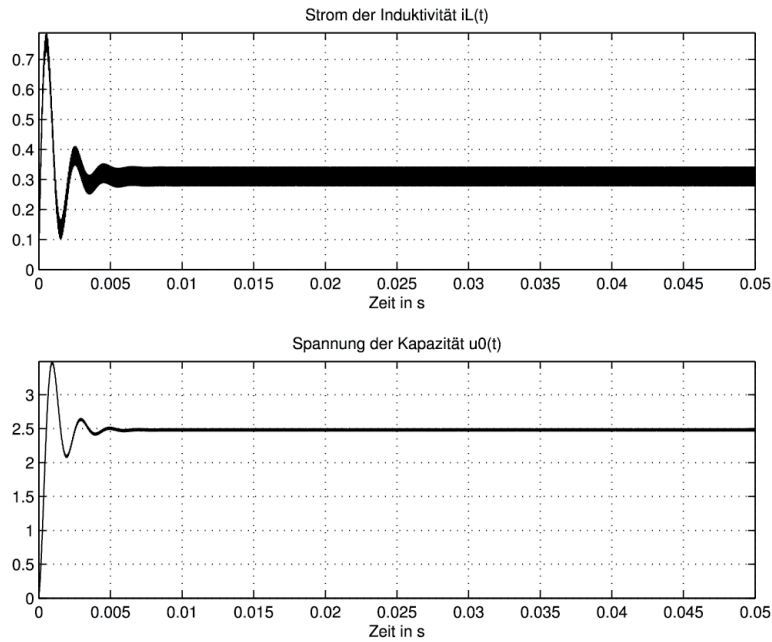

**Abb. 2.14:** Strom  $i_L(t)$  und Ausgangsspannung  $u_0(t)$  des Wandlers mit nicht idealem Kondensator (buck\_down\_3.m, buck\_down3.mdl)

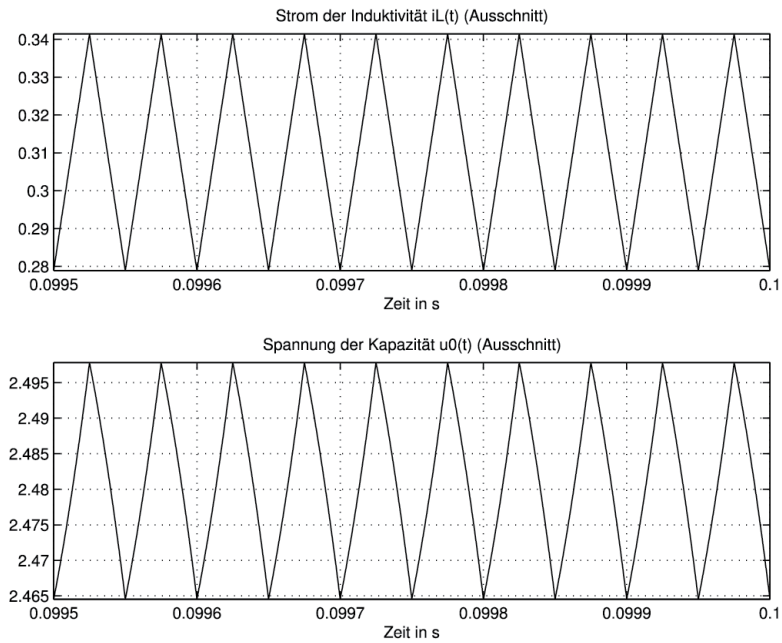

**Abb. 2.15:** Strom  $i_L(t)$  und Ausgangsspannung  $u_0(t)$  des Wandlers mit nicht idealem Kondensator (Ausschnitt)  
(buck\_down\_3.m, buck\_down3.mdl)

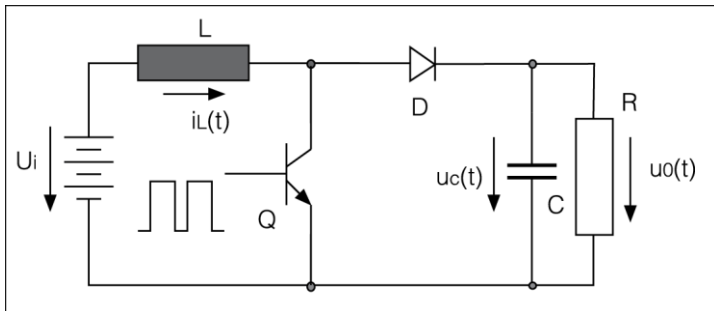

**Abb. 2.16:** *Step-Up*-Wandler mit idealem Kondensator

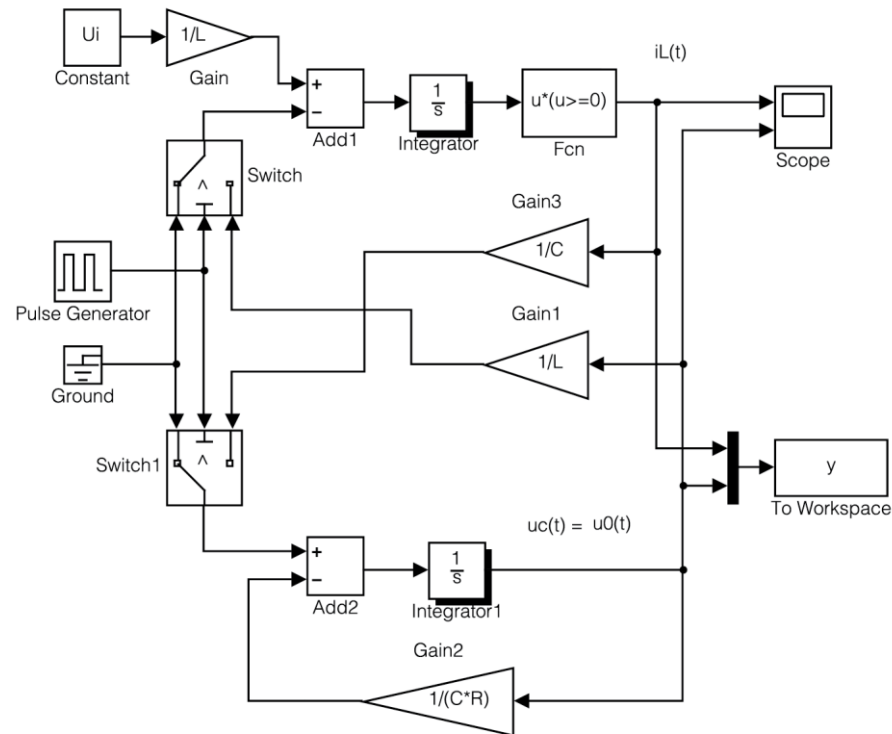

**Abb. 2.17:** Simulink-Modell des DC-DC-*Step-Up*-Wandlers (boost\_up1.m, boost\_up\_1.mdl)

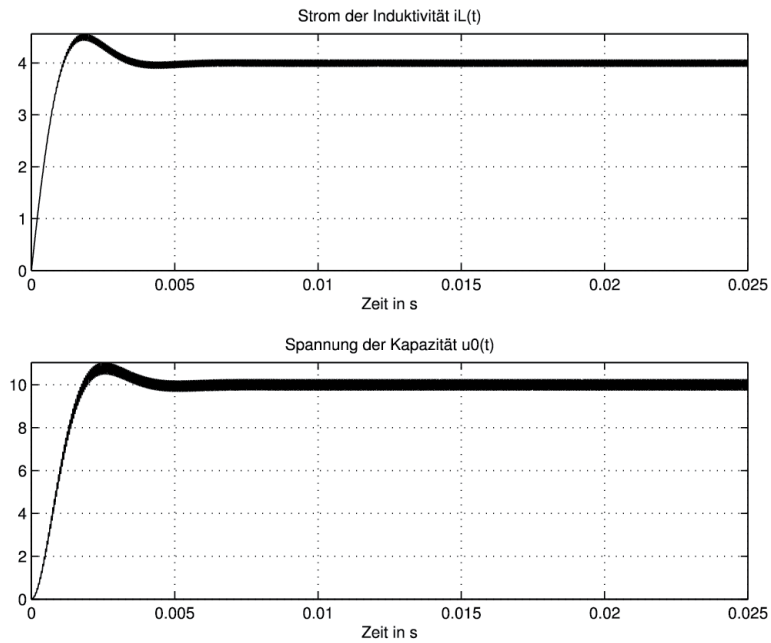

**Abb. 2.18:** Strom  $i_L(t)$  und Ausgangsspannung  $u_0(t)$  des DC-DC-*Step-Up*-Wandlers (boost\_up1.m, boost\_up\_1.mdl)

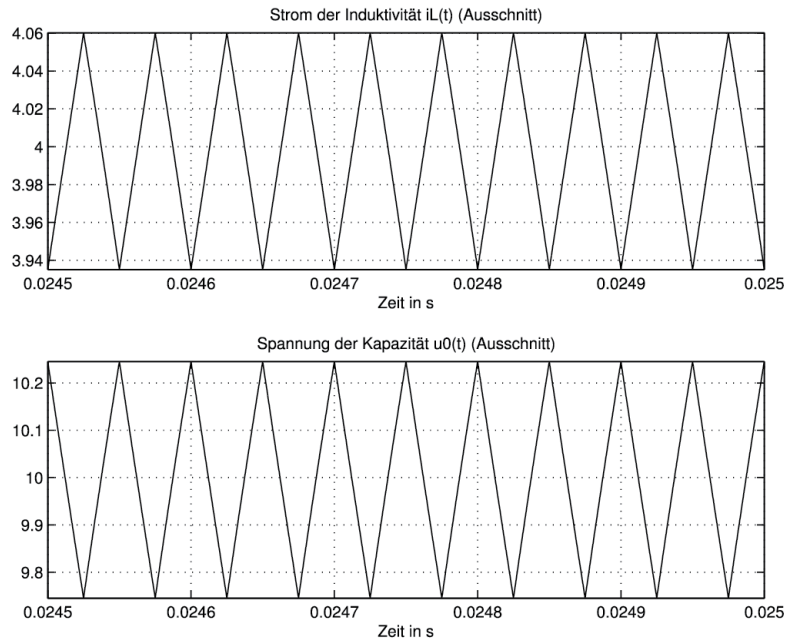

**Abb. 2.19:** Strom  $i_L(t)$  und Ausgangsspannung  $u_0(t)$  des DC-DC-*Step-Up*-Wandlers (Ausschnitt)  
(boost\_up1.m, boost\_up\_1.mdl)



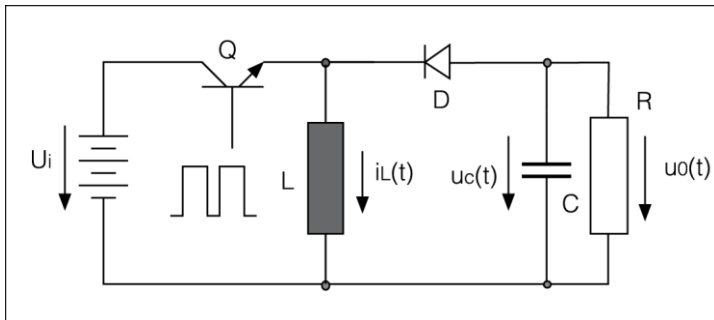

**Abb. 2.20:** *Step-Up*-Wandler mit idealem Kondensator

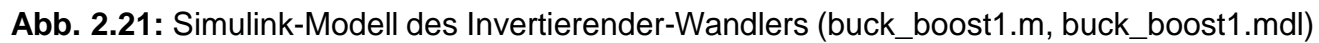

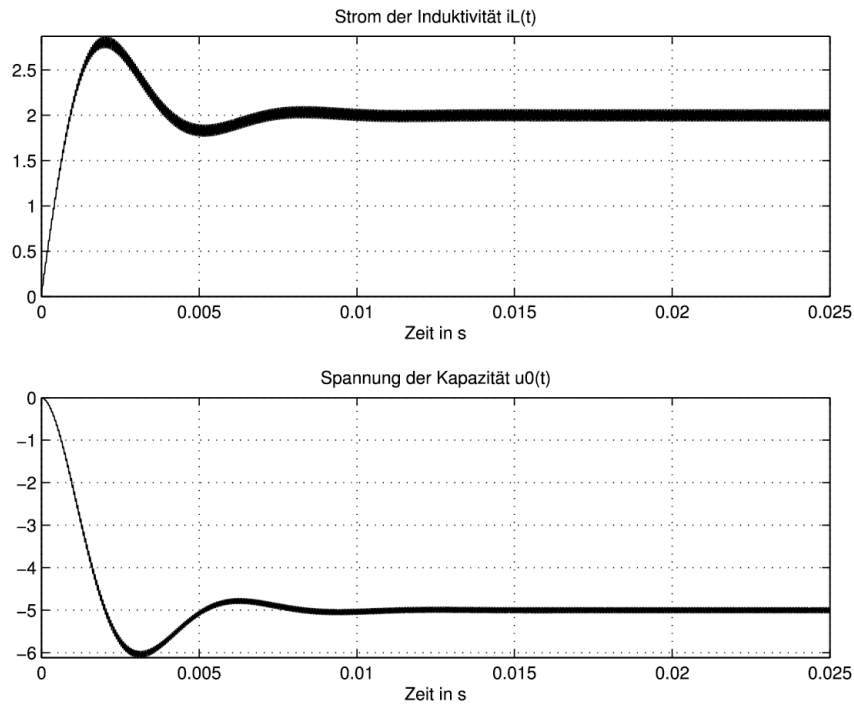

**Abb. 2.22:** Strom  $i_L(t)$  und Ausgangsspannung  $u_0(t)$  des Invertierender-Wandlers (buck\_boost1.m, buck\_boost1.mdl)

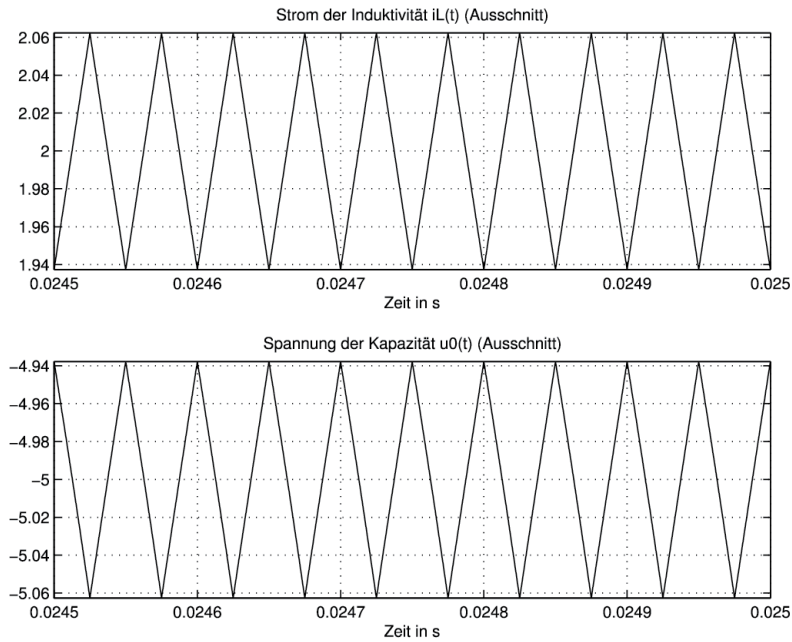

**Abb. 2.23:** Strom  $i_L(t)$  und Ausgangsspannung  $u_0(t)$  des Invertierender-Wandlers (Ausschnitt)  
(buck\_boost1.m, buck\_boost1.mdl)

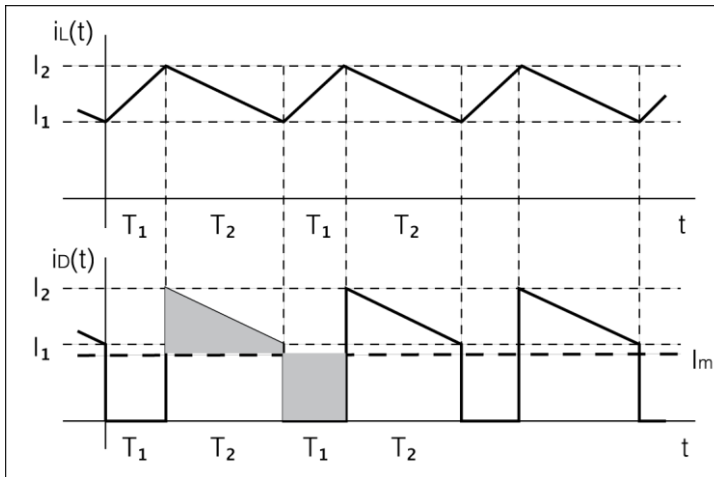

**Abb. 2.24:** Strom  $i_L(t)$  und Strom der Diode

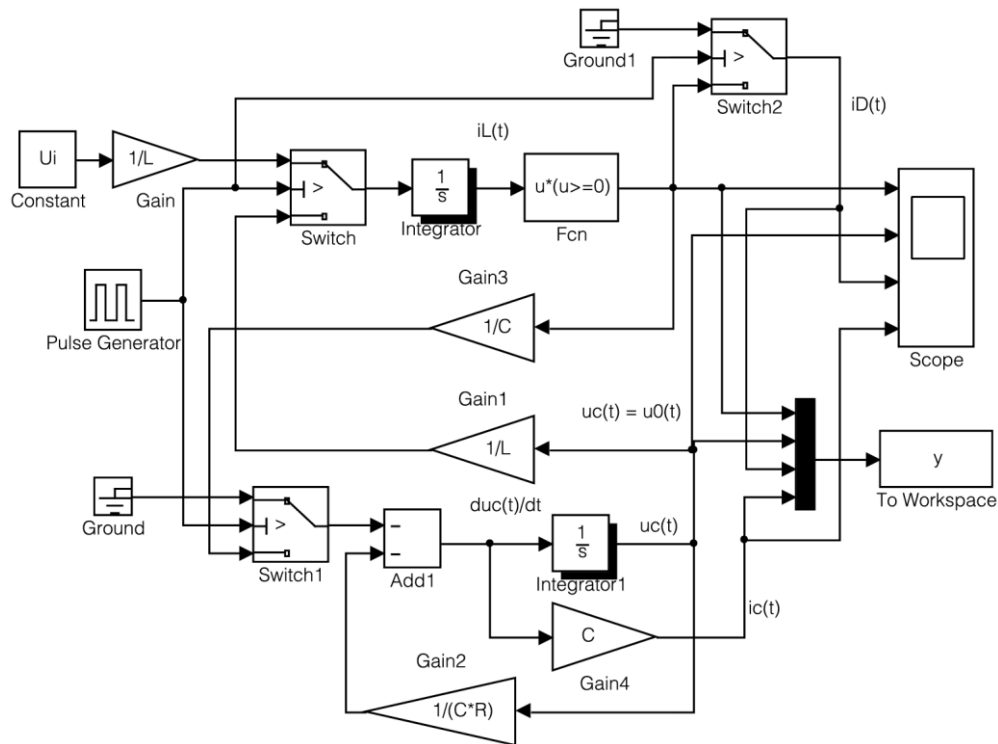

**Abb. 2.25:** Simulink-Modell des Invertierender-Wandlers in dem auch der Strom der Diode und der Kapazität simuliert werden (buck\_boost2.m, buck\_boost2.mdl)

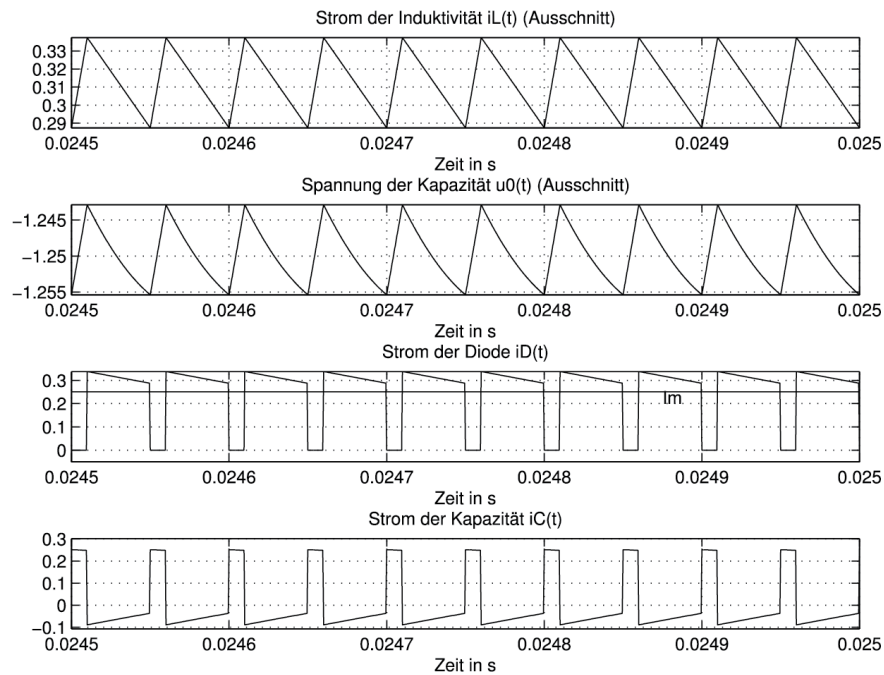

**Abb. 2.26:** Ergebnisse die den Strom der Diode und der Kapazität enthalten (buck\_boost2.m, buck\_boost2.mdl)

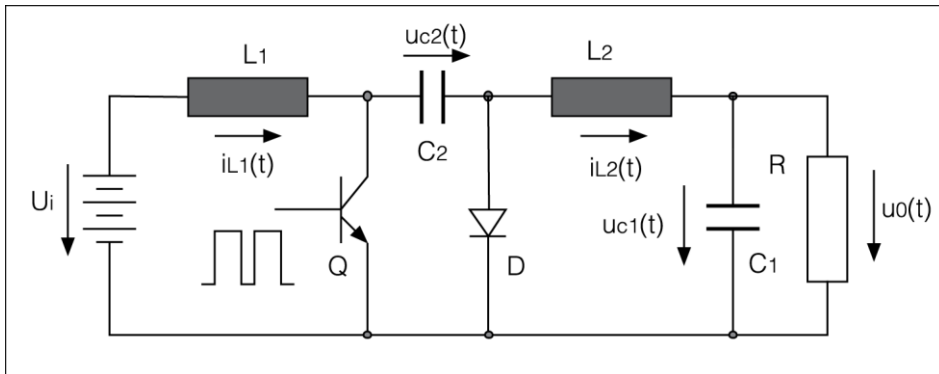

**Abb. 2.27:** Schaltung des DC-DC-Cuk-Wandlers



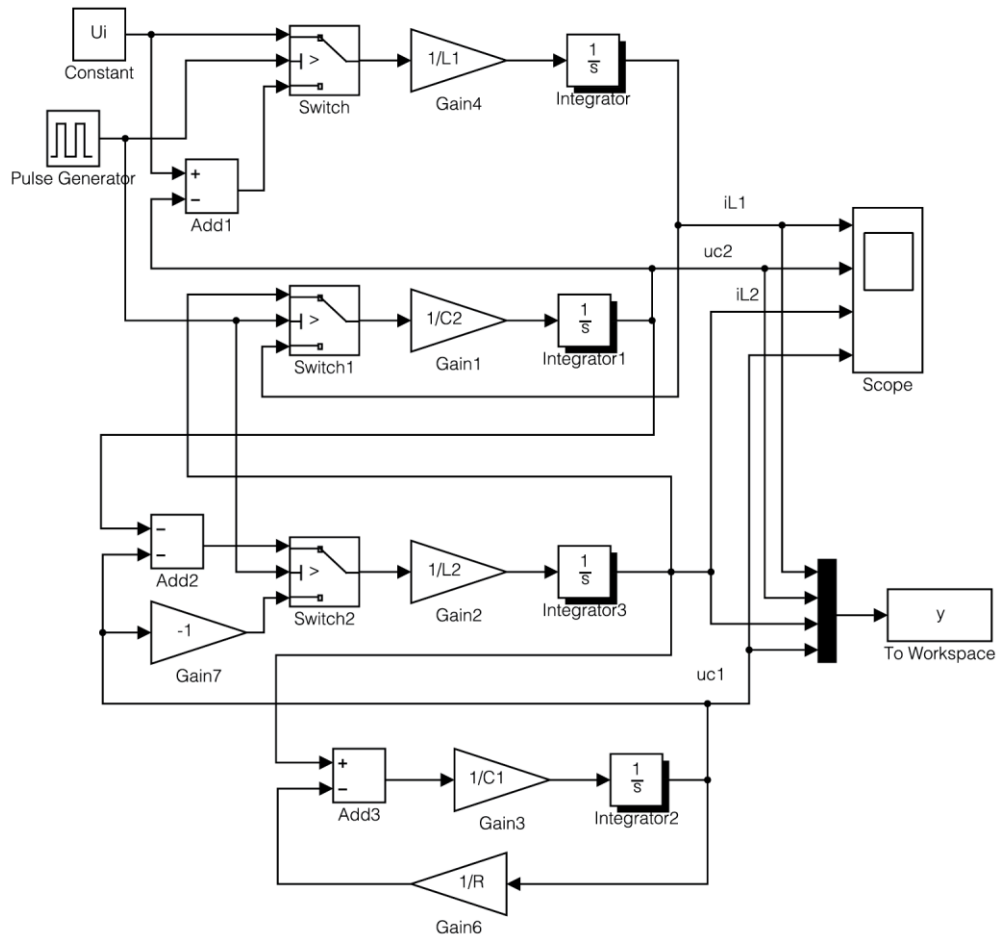

**Abb. 2.28:** Simulink-Modell des DC-DC-Cuk-Wandlers (cuk1.m, cuk\_1.mdl)

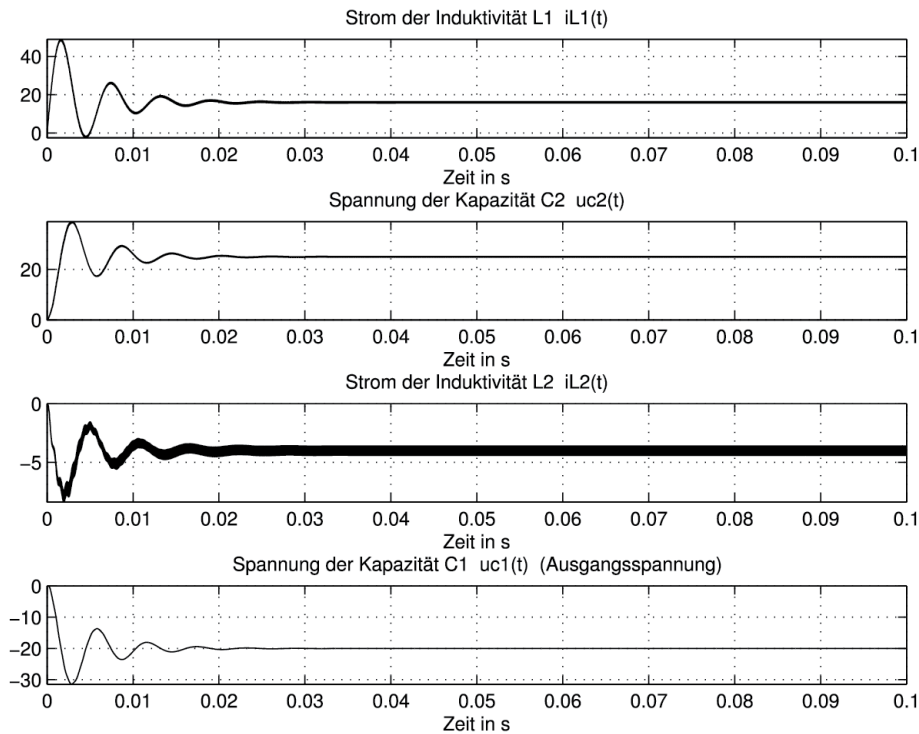

**Abb. 2.29:** Zustandsvariablen des DC-DC-Cuk-Wandlers (cuk1.m, cuk\_1.mdl)

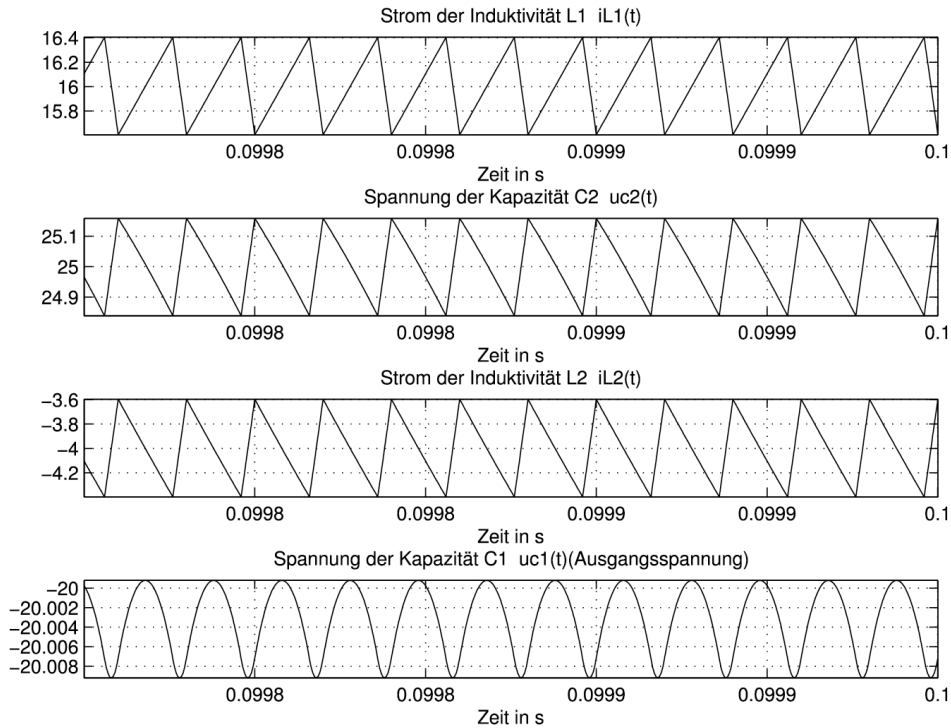

**Abb. 2.30:** Zustandsvariablen des DC-DC-Cuk-Wandlers (Ausschnitt im stationären Zustand (cuk1.m, cuk\_1.mdl))

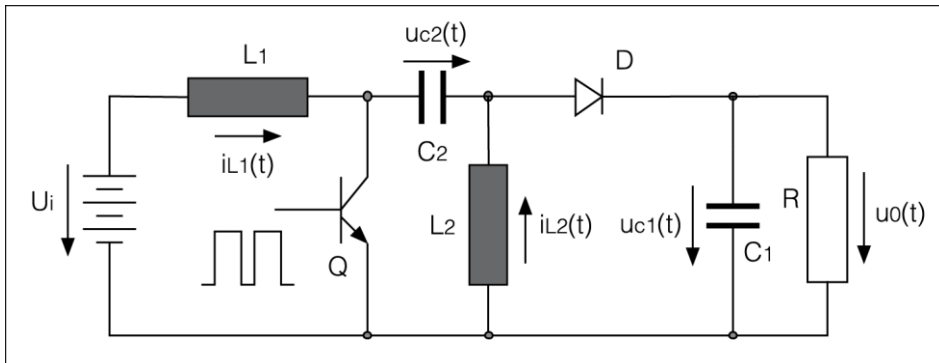

**Abb. 2.31:** DC-DC-SEPIC-Wandler mit nicht gekoppelten Induktivitäten

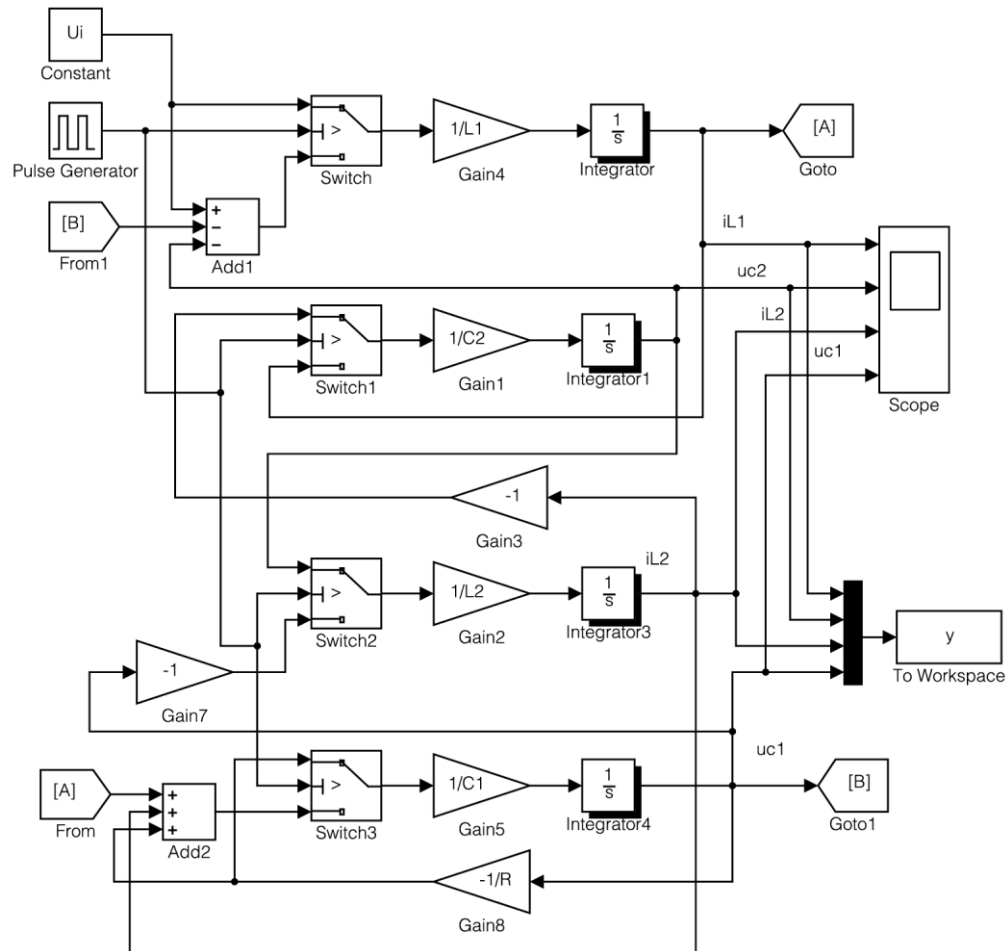

**Abb. 2.32:** Simulink-Modell des DC-DC-Sepic-Wandlers (sepic1.m, sepic\_1.mdl)

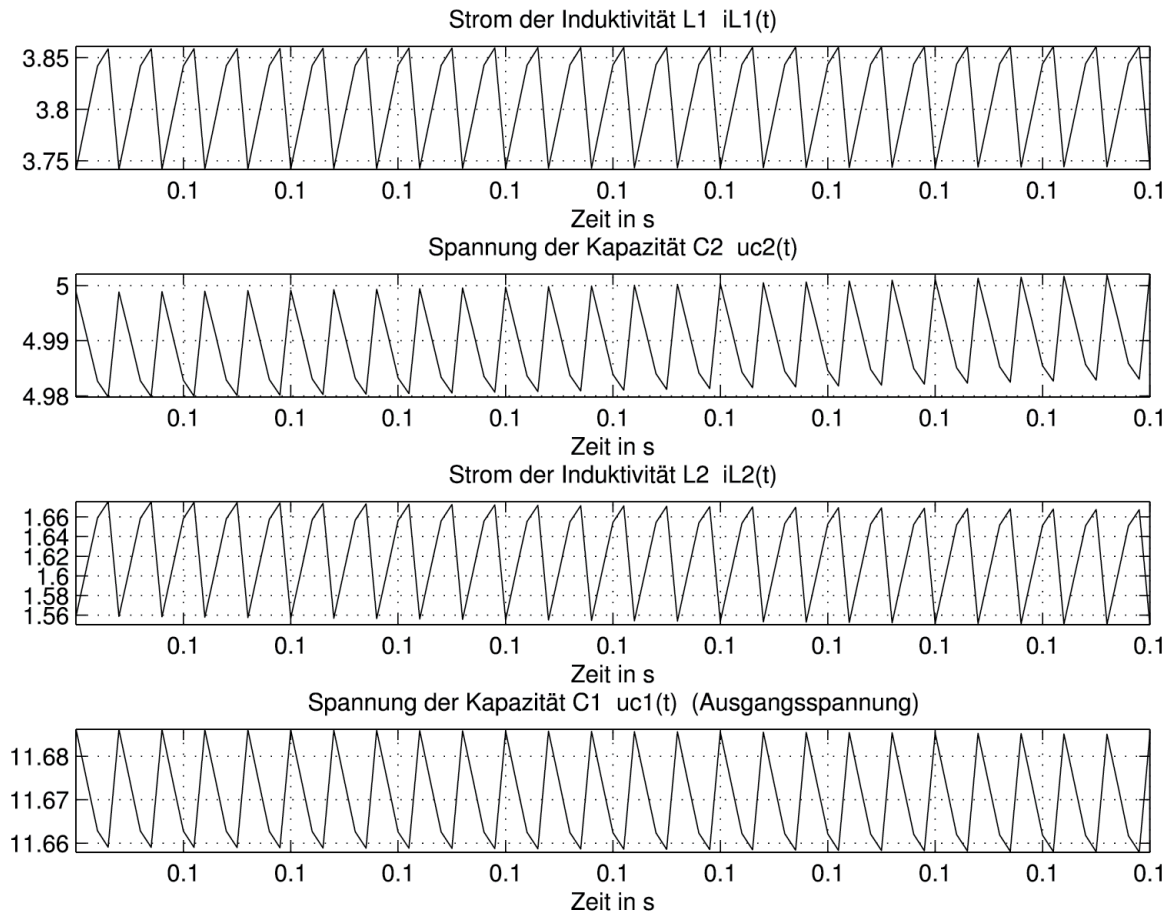

**Abb. 2.33:** Zustandsvariablen des DC-DC-Sepic-Wandlers (sepic1.m, sepic\_1.mdl)

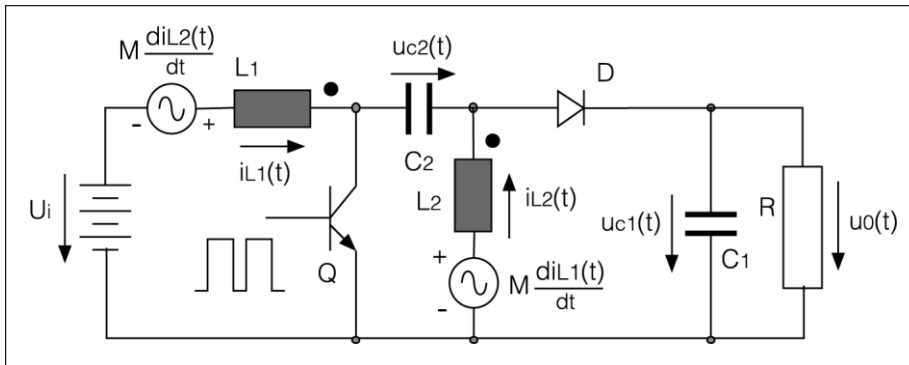

**Abb. 2.34:** DC-DC-SEPIC-Wandler mit gekoppelten Spulen der Induktivitäten

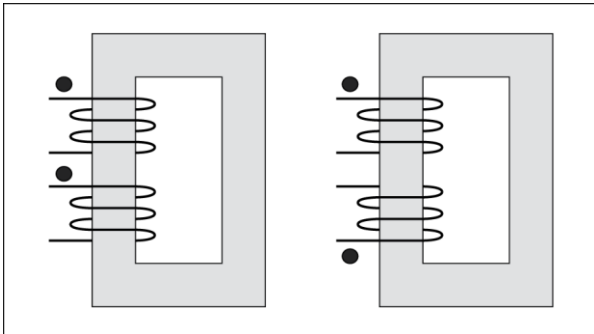

**Abb. 2.35:** Wicklungssinn zweier gekoppelter Spulen



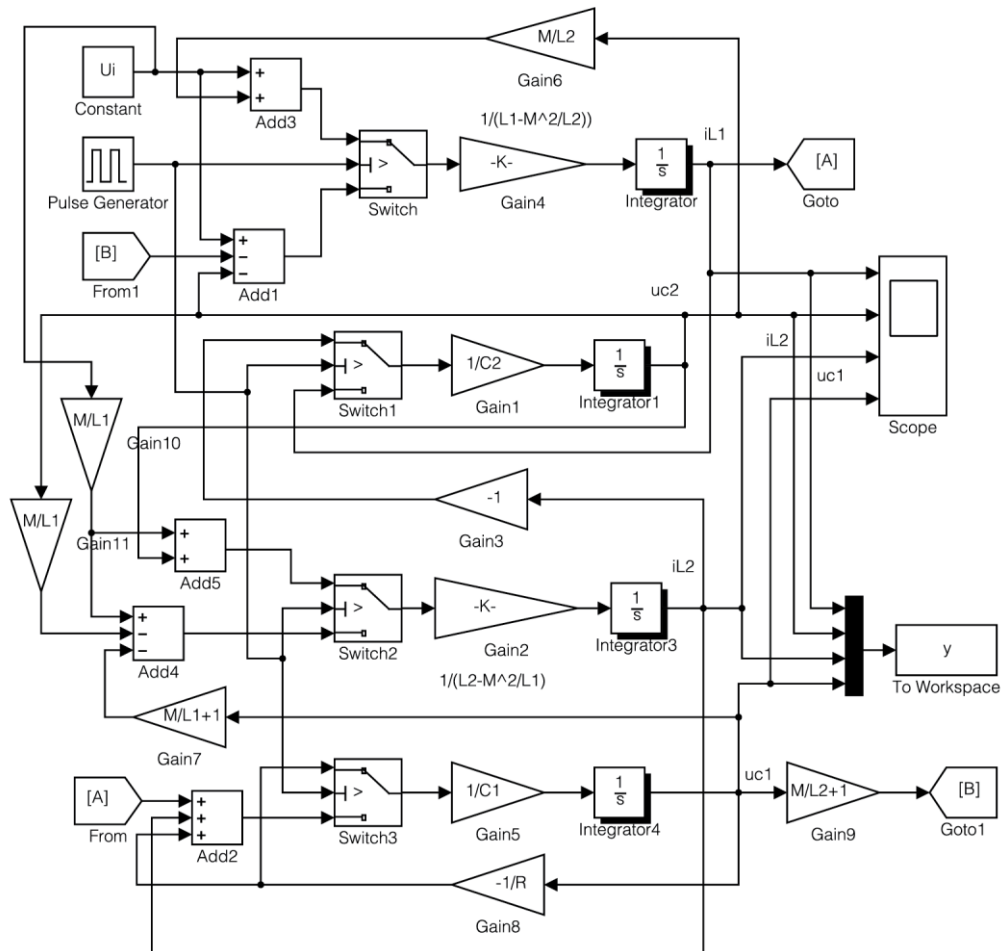

**Abb. 2.36:** Simulink-Modell des Wandlers mit gekoppelten Spulen der Induktivitäten (sepic2.m, sepic\_2.mdl)

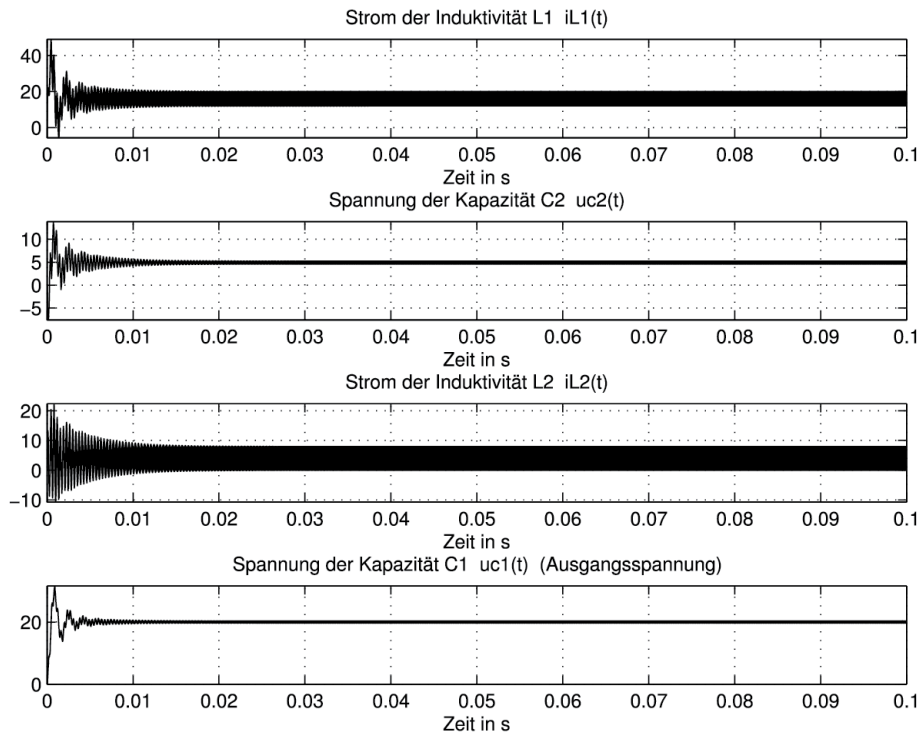

**Abb. 2.37:** Zustandsvariablen des Wandlers mit gekoppelten Spulen der Induktivitäten (sepic2.m, sepic\_2.mdl)

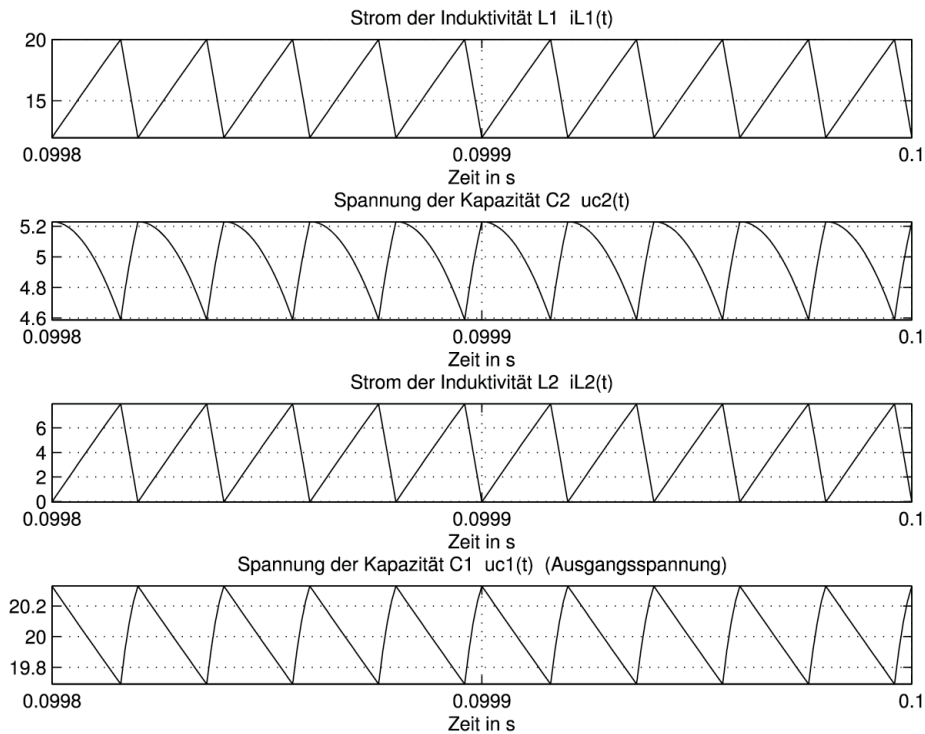

**Abb. 2.38:** Zustandsvariablen des Wandlers mit gekoppelten Spulen der Induktivitäten (Ausschnitt) (sepic2.m, sepic\_2.mdl)

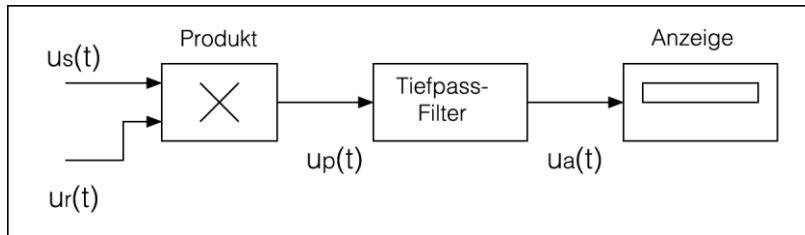

**Abb. 2.39:** Block-Schema des Lock-In-Verfahrens

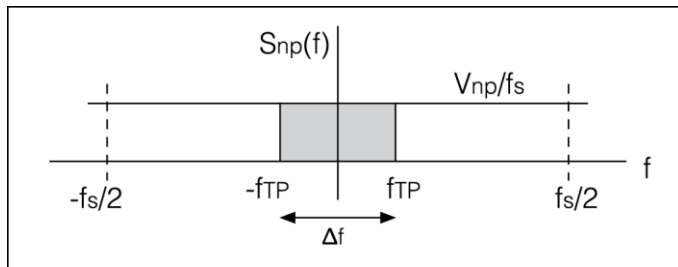

**Abb. 2.40:** Spektrale Leistungsdichte  $S_{np} = V_{np}/f_s$  nach dem Multiplizierer und Berechnung der Varianz am Ausgang des Tiefpassfilters aus der geschwärzten Fläche

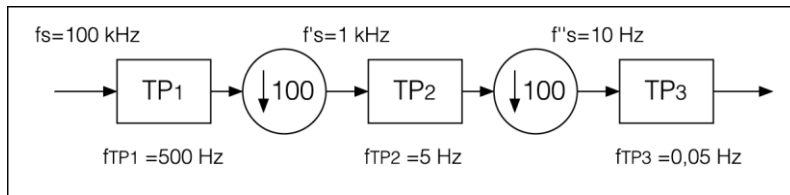

**Abb. 2.41:** Tiefpassfilterung in mehreren Stufen

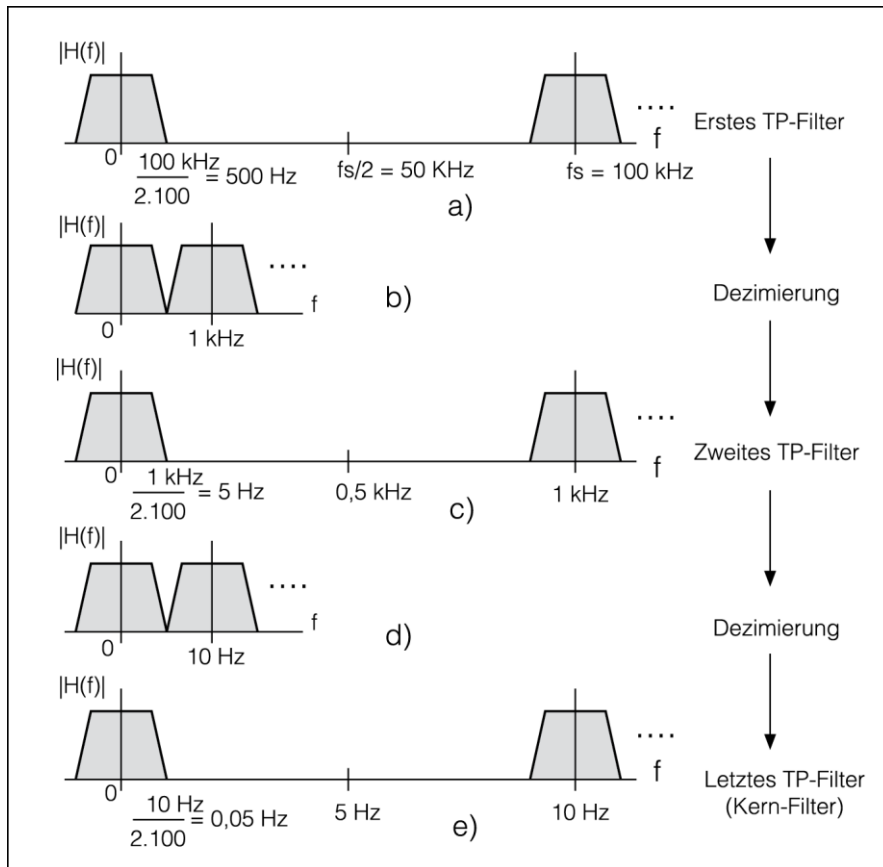

**Abb. 2.42:** Amplitudengänge der Tiefpassfilterung in mehreren Stufen

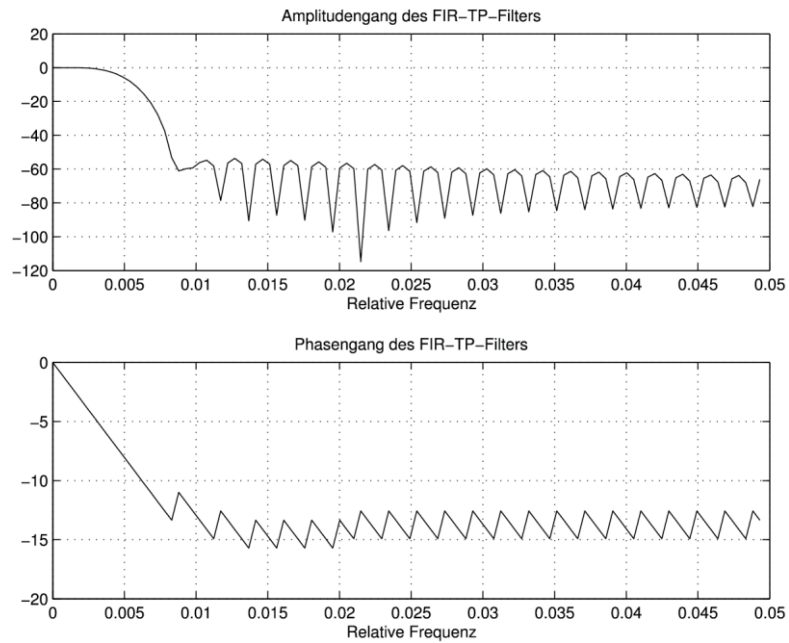

**Abb. 2.43:** Frequenzgang des FIR-Tiefpassfilters (TP\_1.m)



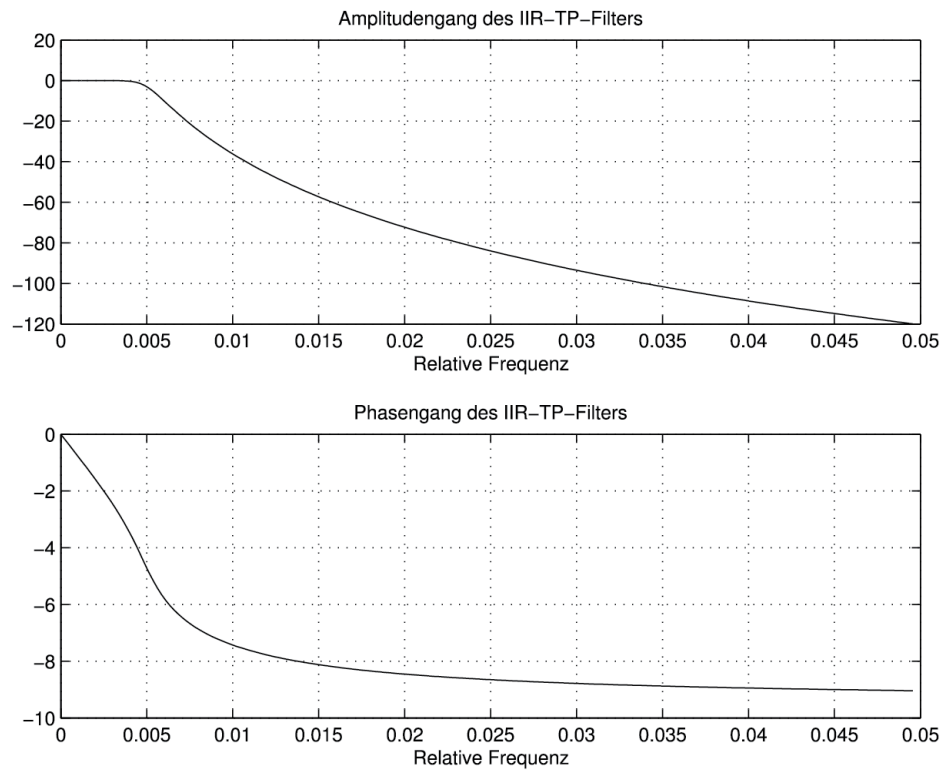

**Abb. 2.44:** Frequenzgang des IIR-Tiefpassfilters (TP\_1.m)

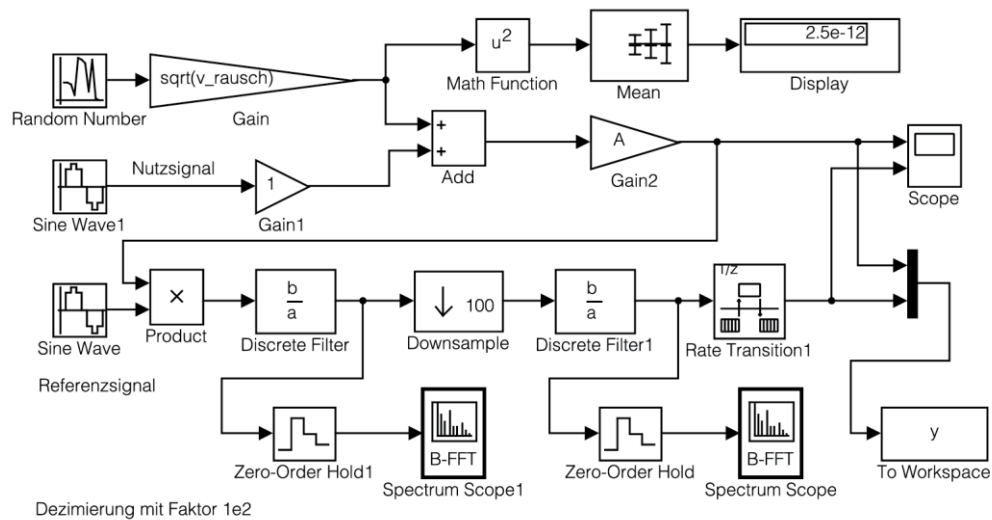

**Abb. 2.45:** Simulink-Modell des Lock-In-verstärkers (lock\_in01.m, lock\_in\_01.mdl)

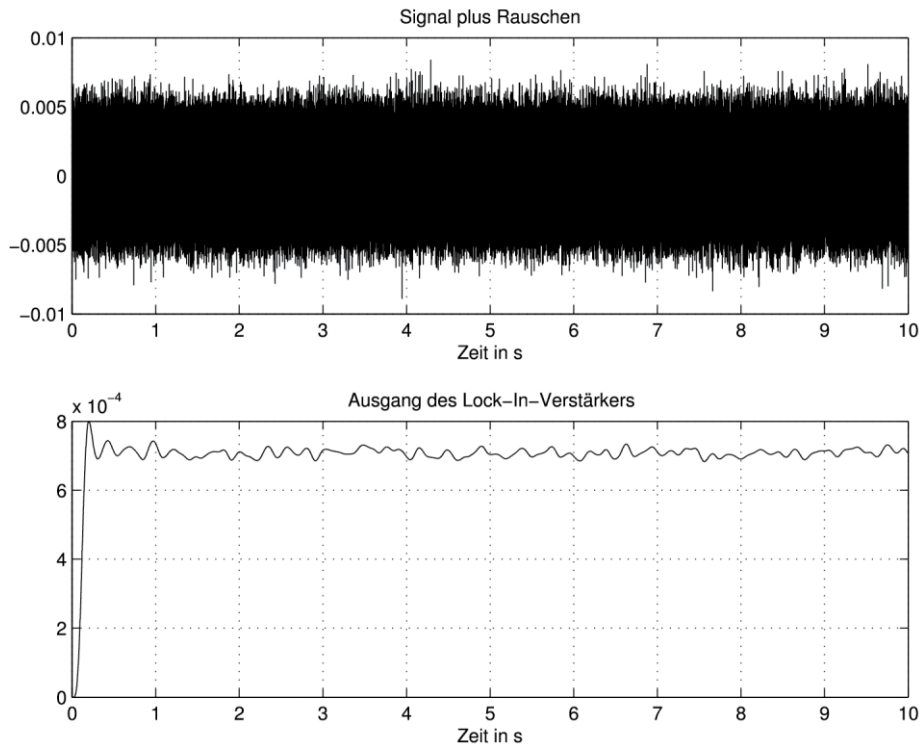

**Abb. 2.46:** Verrauschtes Eingangssignal und Ausgang des Lock-In-Verstärkers (lock\_in01.m, lock\_in\_01.mdl)

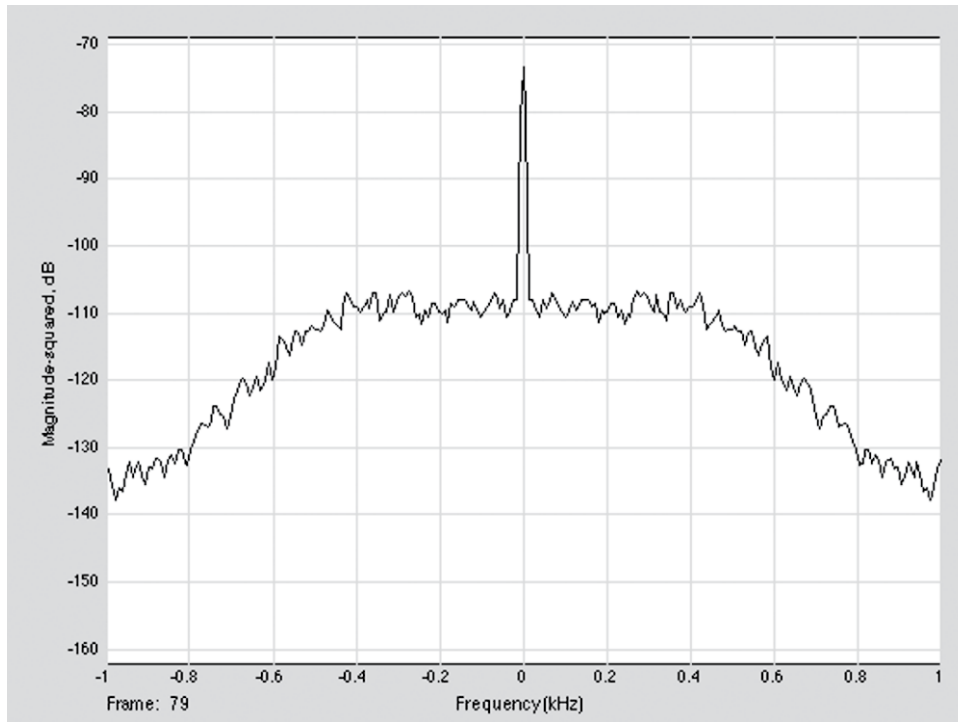

**Abb. 2.47:** Spektrale Leistungsdichte nach dem Multiplizierer (lock\_in01.m, lock\_in\_01.mdl)

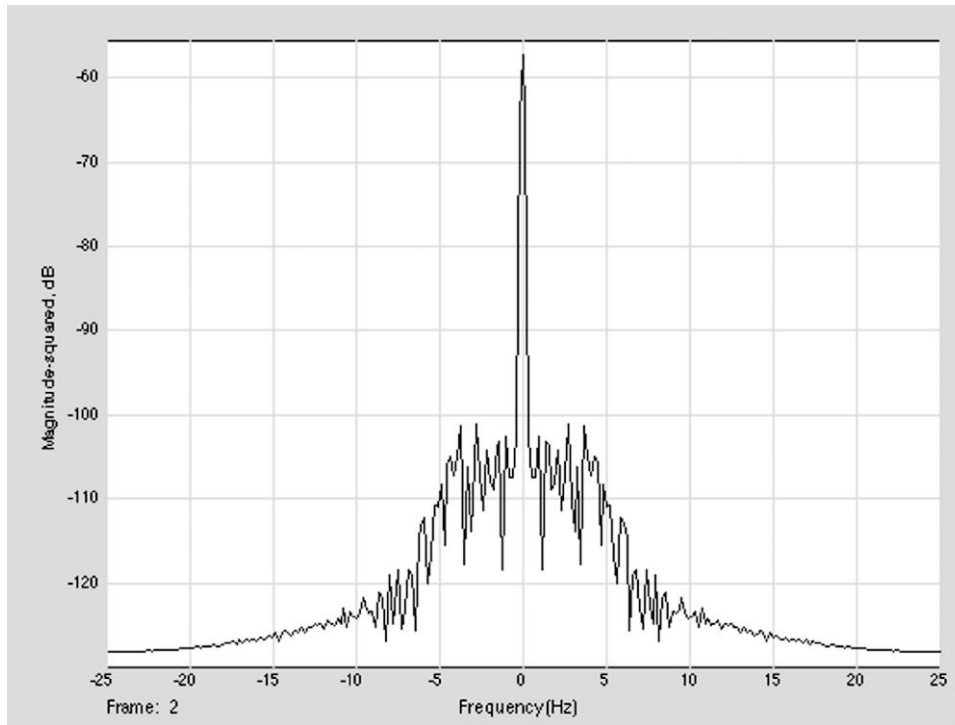

**Abb. 2.48:** Spektrale Leistungsdichte am Ausgang (lock\_in01.m, lock\_in\_01.mdl)

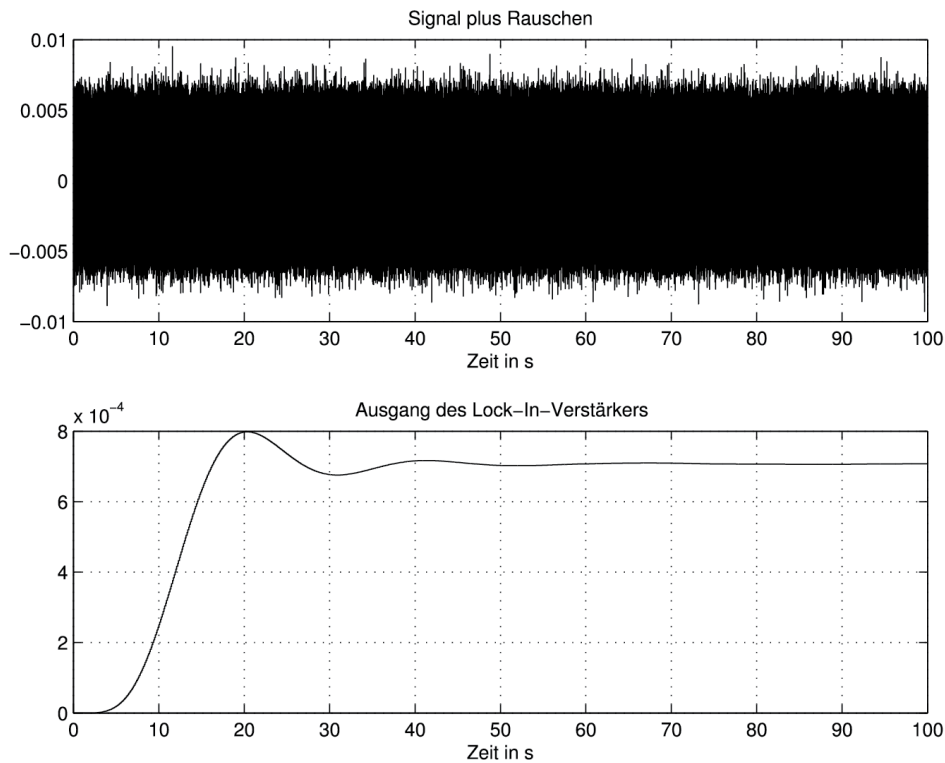

**Abb. 2.49:** Verrauschtes Eingangssignal von 1  $\mu$ V Effektivwert und Ausgang des Lock-In-Verstärkers (lock\_in02.m, lock\_in\_02.mdl)

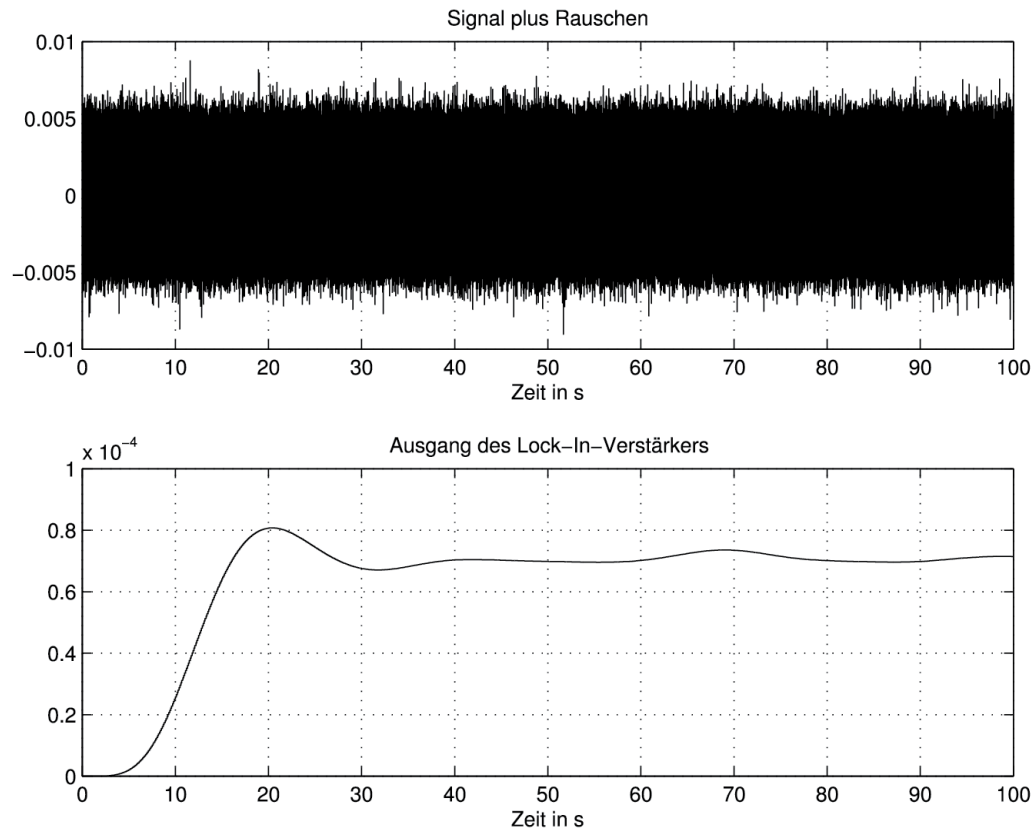

**Abb. 2.50:** Verrauschtes Eingangssignal von 100 nV Effektivwert und Ausgang des Lock-In-Verstärkers (lock\_in02.m, lock\_in\_02.mdl)

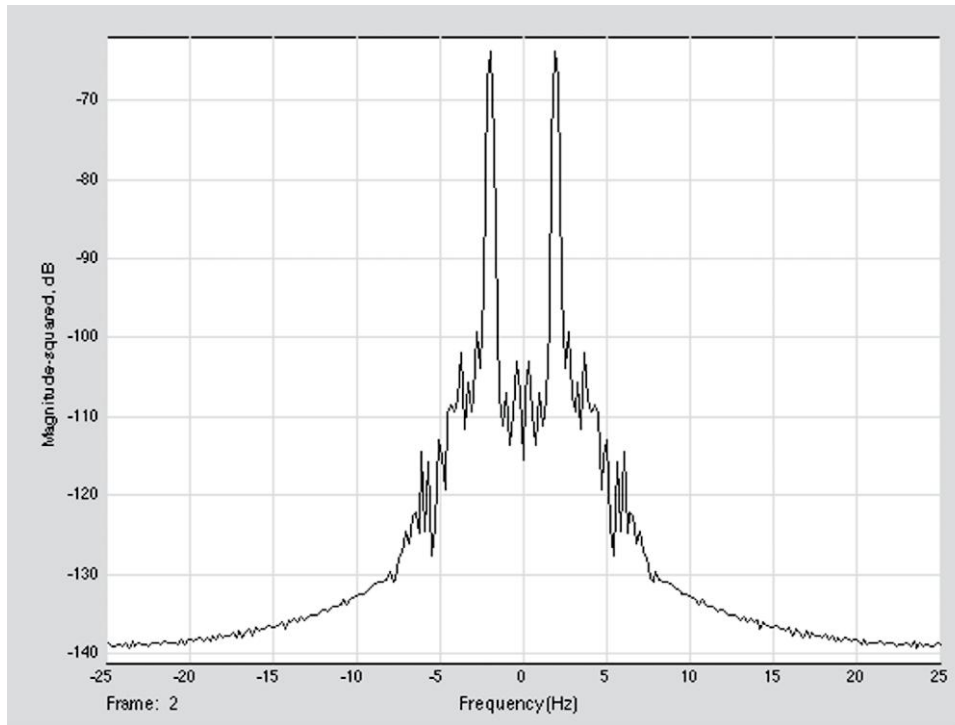

**Abb. 2.51:** Spektrale Leistungsdichte des Ausgangs für eine Differenz der Frequenzen von 2 Hz (lock\_in011.m, lock\_in\_011.mdl)



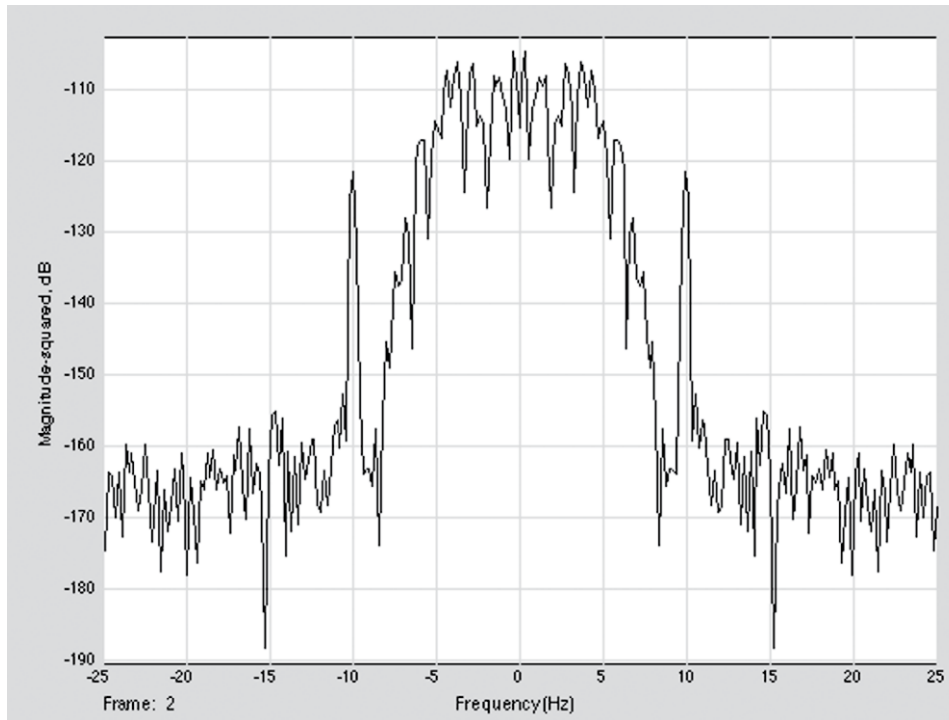

**Abb. 2.52:** Spektrale Leistungsdichte des Ausgangs für eine Differenz der Frequenzen von 10 Hz (lock\_in011.m, lock\_in\_011.mdl)

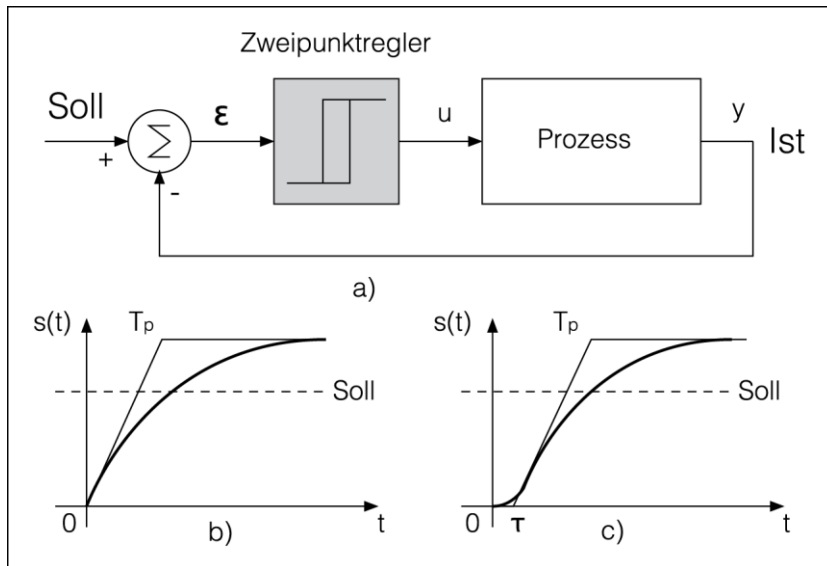

**Abb. 3.1:** a) Blockschaltung der Zweipunktregelung b) Sprungantwort eines Prozesses erster Ordnung mit Zeitkonstante  $T_p$   
c) Sprungantwort eines Prozesses höherer Ordnung mit Zeitkonstante  $T_p$  und Totzeit  $\tau$

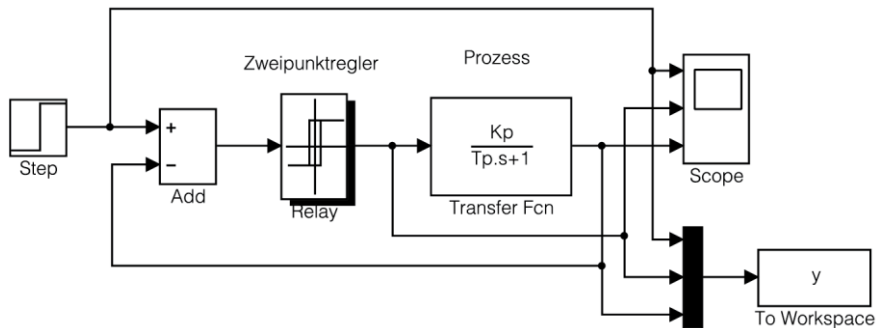

**Abb. 3.2:** Simulink-Modell der Zweipunktregelung eines Prozesses mit Verzögerung erster Ordnung (zweipunkt\_1.m, zweipunkt1.mdl)

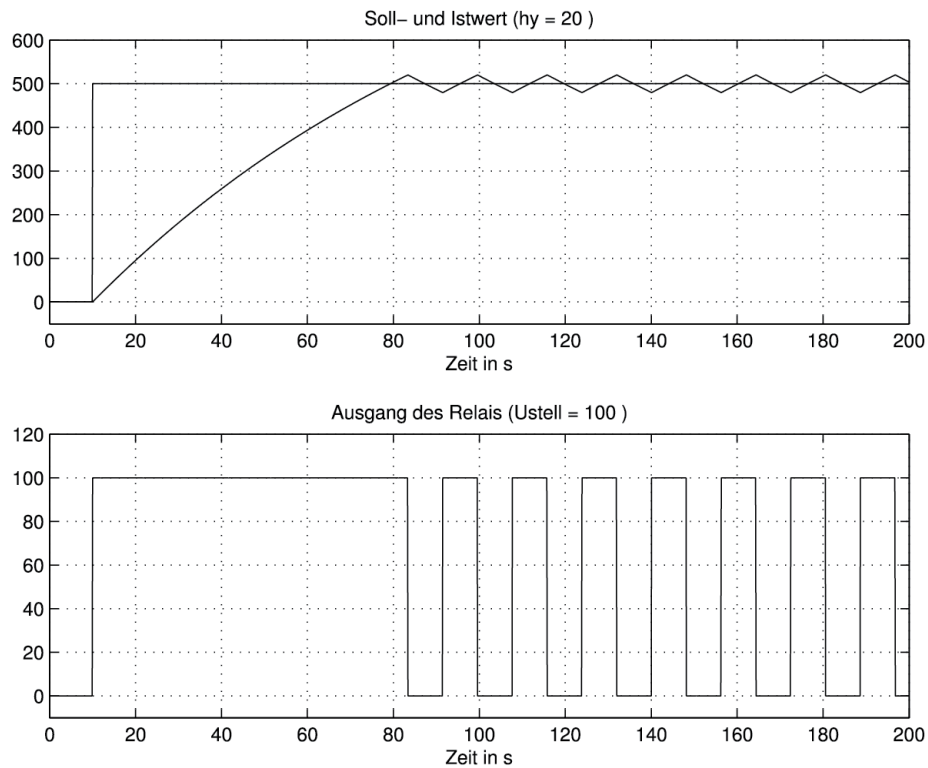

**Abb. 3.3:** Variablen der Zweipunktregelung des Prozesses mit Verzögerung erster Ordnung (zweipunkt\_1.m, zweipunkt1.mdl)

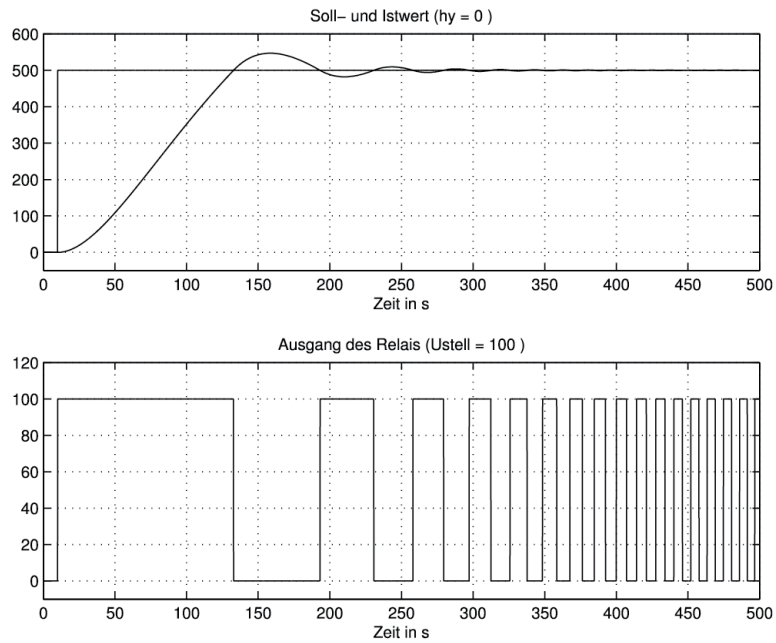

**Abb. 3.4:** Variablen der Zweipunktregelung des Prozesses mit zwei Verzögerungen erster Ordnung (zweipunkt\_2.m, zweipunkt2.mdl)

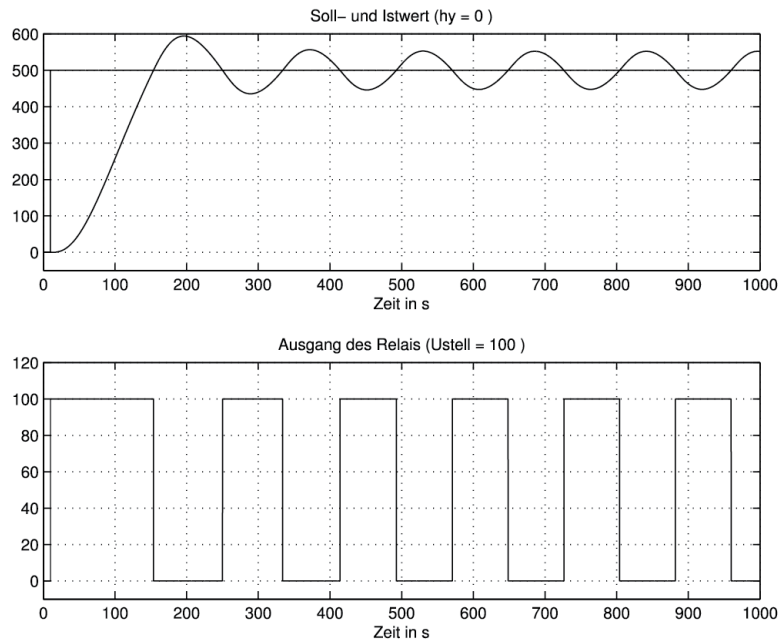

**Abb. 3.5:** Variablen der Zweipunktregelung des Prozesses mit drei Verzögerungen erster Ordnung (zweipunkt\_3.m, zweipunkt3.mdl)

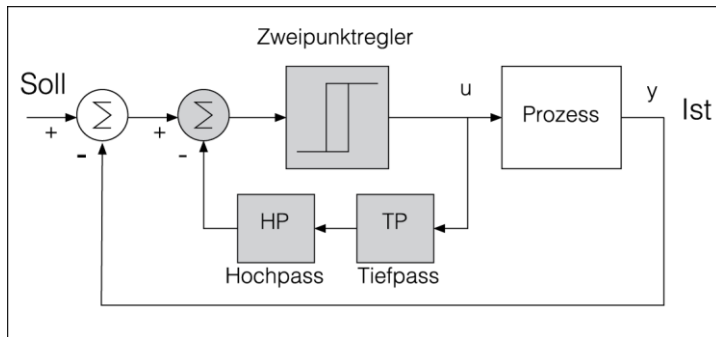

**Abb. 3.6:** Zweipunktregler mit Hysterese und verzögerter und nachgebender Rückführung

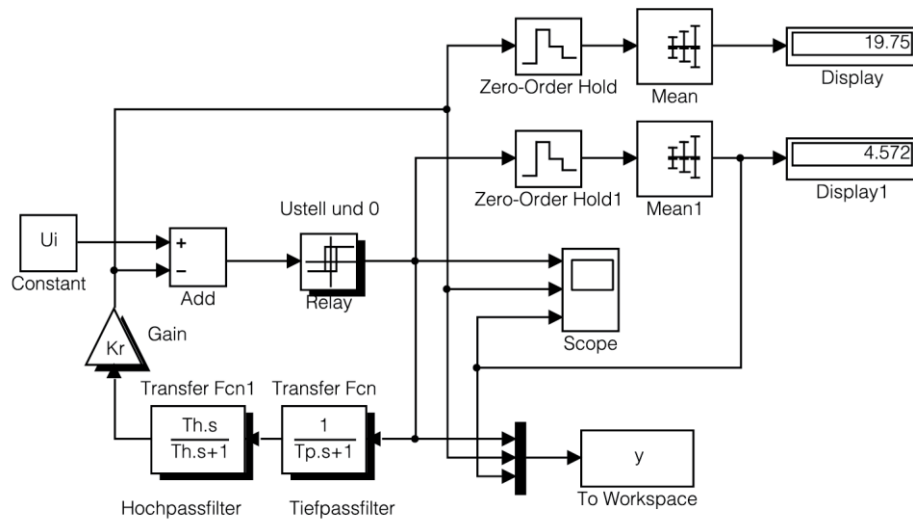

**Abb. 3.7:** Regler mit Relais und Rückführung über Tief- und Hochpassfilter (regulator\_1.m, regulator1.mdl)



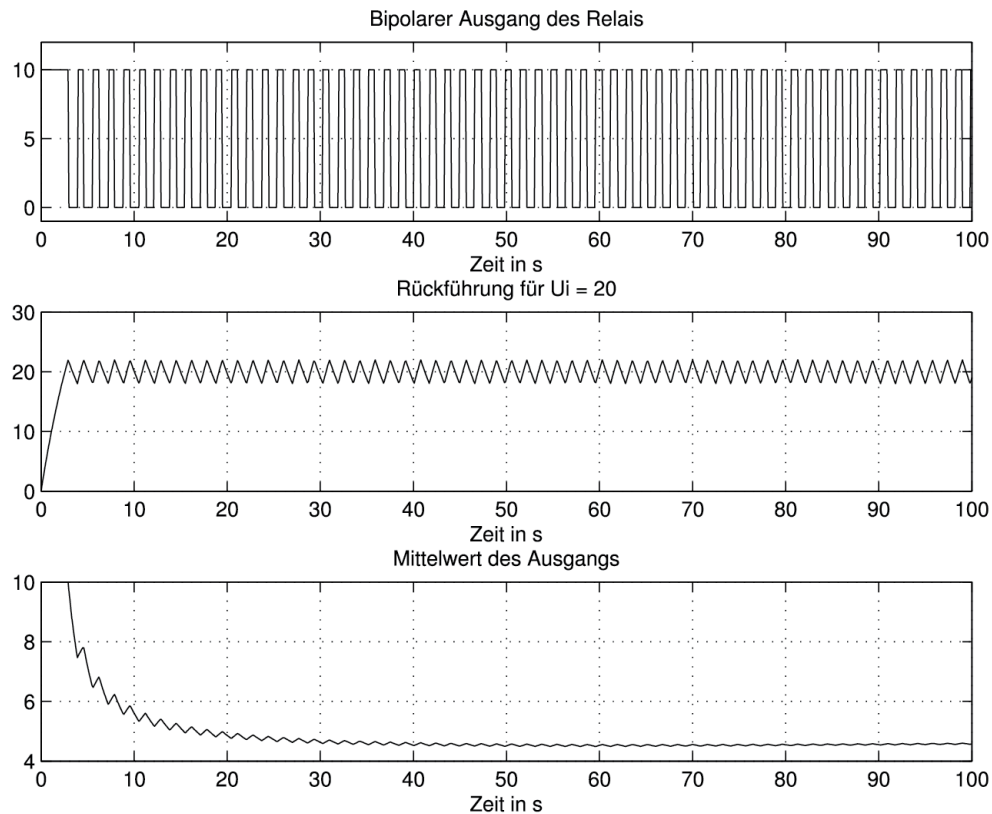

**Abb. 3.8:** Variablen des Reglers mit Rückführung über Tiefpassfilter für  $U_i = 20$   
(regulator\_1.m, regulator1.mdl)

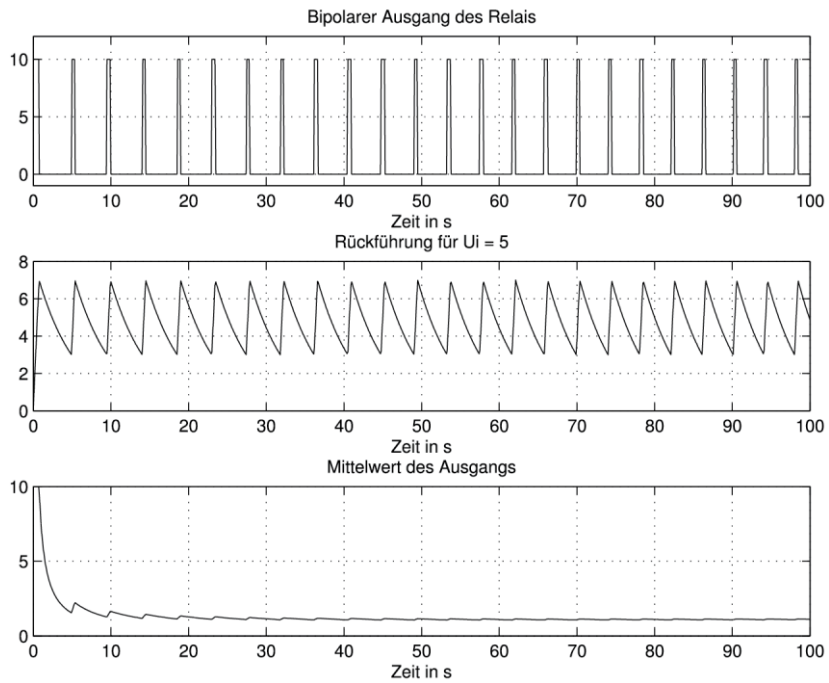

**Abb. 3.9:** Variablen des Reglers mit Rückführung über Tiefpassfilter für  $U_i = 5$  (regulator\_1.m, regulator1.mdl)

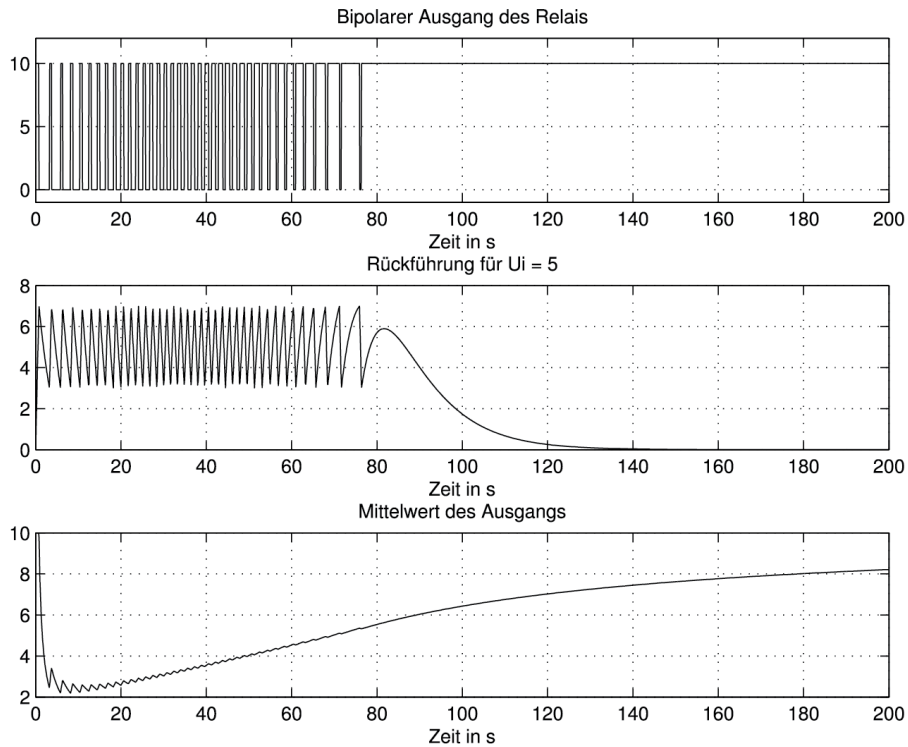

**Abb. 3.10:** Variablen des Reglers mit Rückführung über Tief- und Hochpassfilter für  $U_i = 5$  (regulator\_1.m, regulator1.mdl)

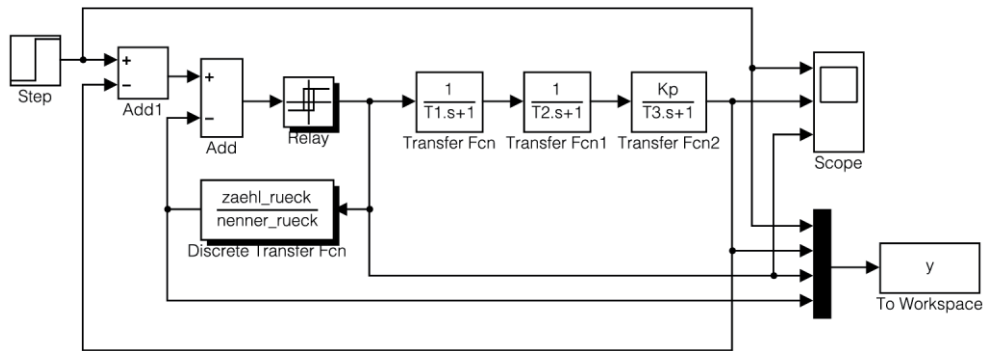

**Abb. 3.11:** Simulink-Modell des Systems mit Zweipunktregler mit Hysterese und verzögerter und nachgebender Rückführung (zweipunkt\_31.m, zweipunkt31.mdl)

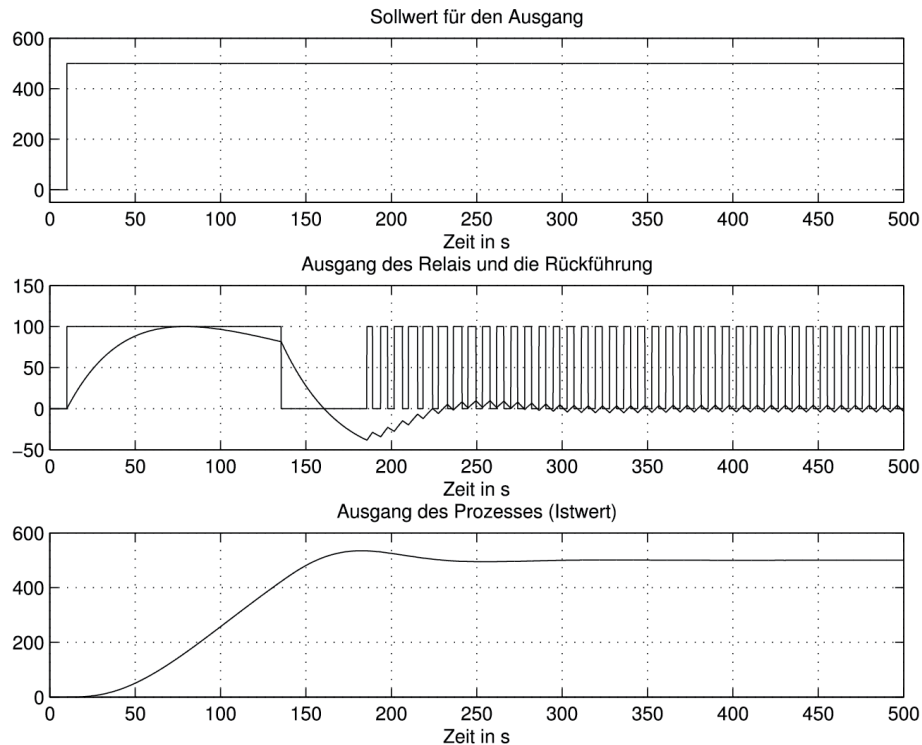

**Abb. 3.12:** a) Sollwert b) Ausgang des Relais und die Rückführung c) Ausgang des Prozesses (Istwert)  
(zweipunkt\_31.m, zweipunkt31.mdl)

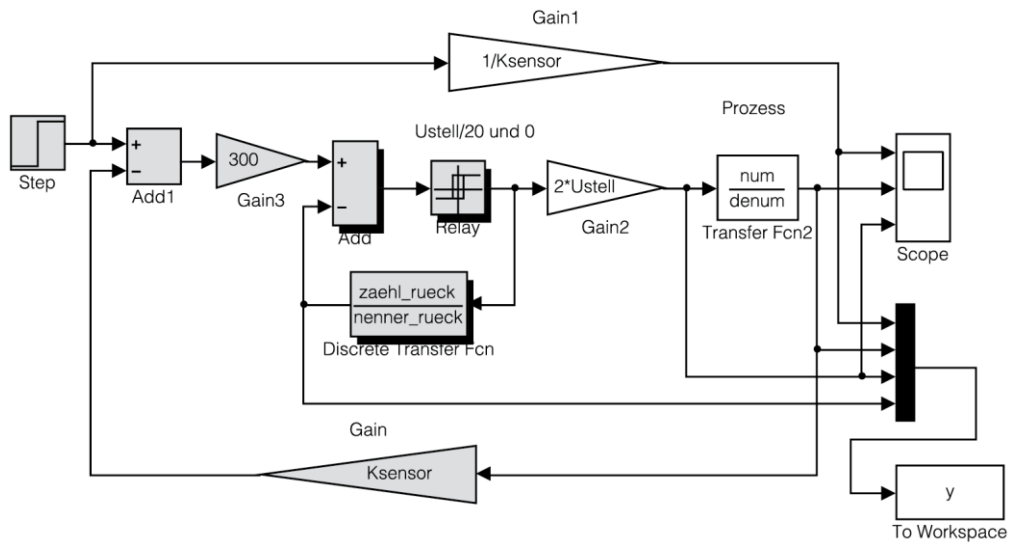

**Abb. 3.13:** Simulink-Modell des Systems mit Mikrokontroller-Regler (zweipunkt\_32.m, zweipunkt32.mdl)

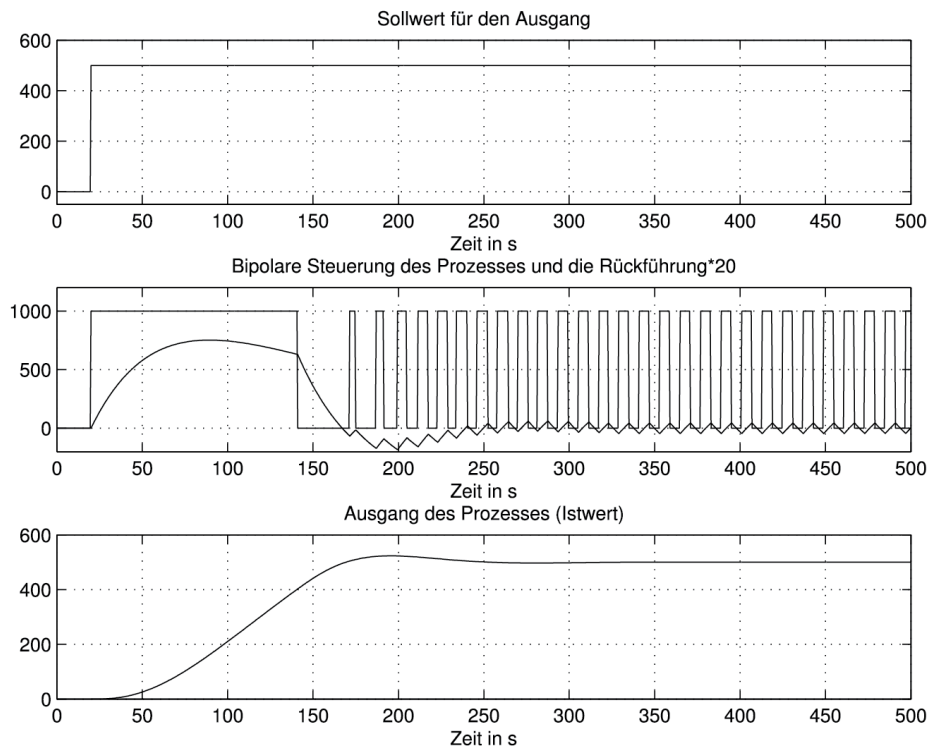

**Abb. 3.14:** a) Sollwertsprung b) Zweipunkt Steuerung und die Rückführung c) Antwort (Istwert)  
(zweipunkt\_32.m, zweipunkt32.mdl)

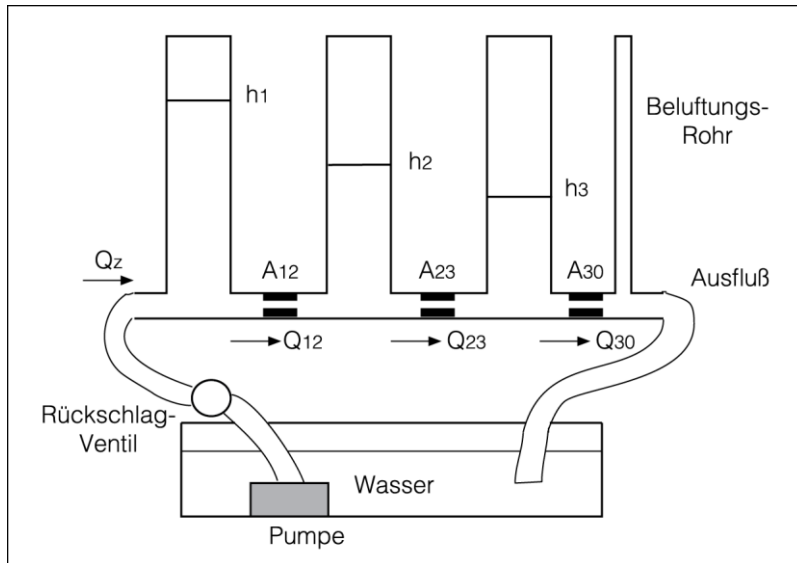

**Abb. 3.15:** Dreitanksystem



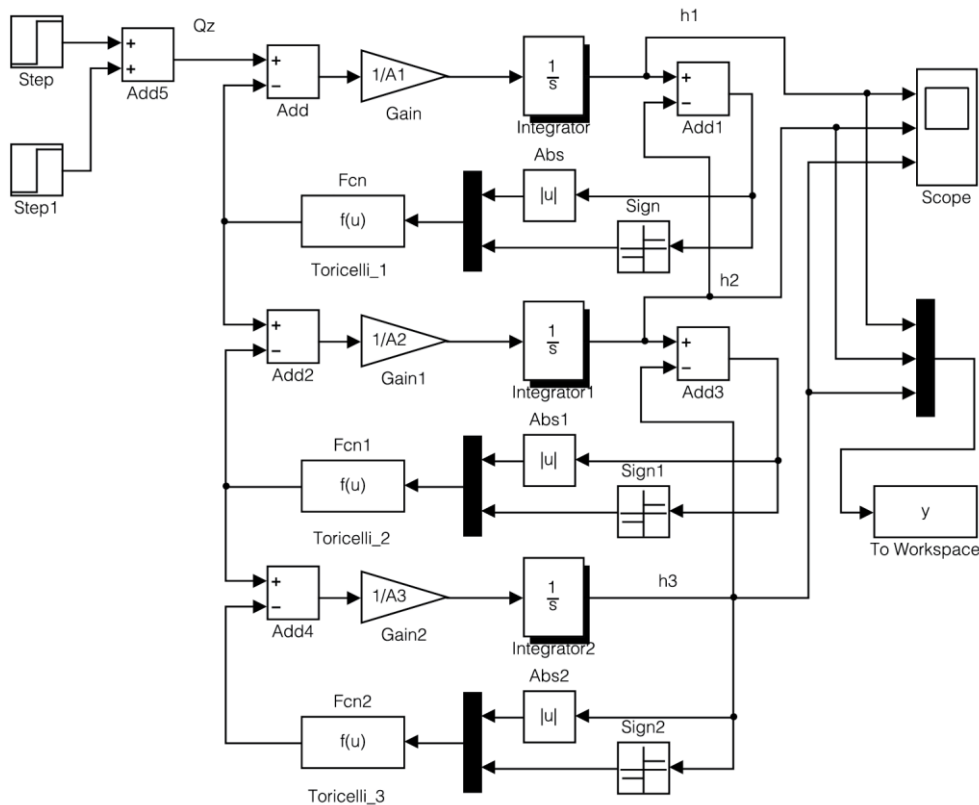

**Abb. 3.16:** Simulink-Modell des Dreitanksystem (fuellstd\_1.m, fuellstd1.mdl)

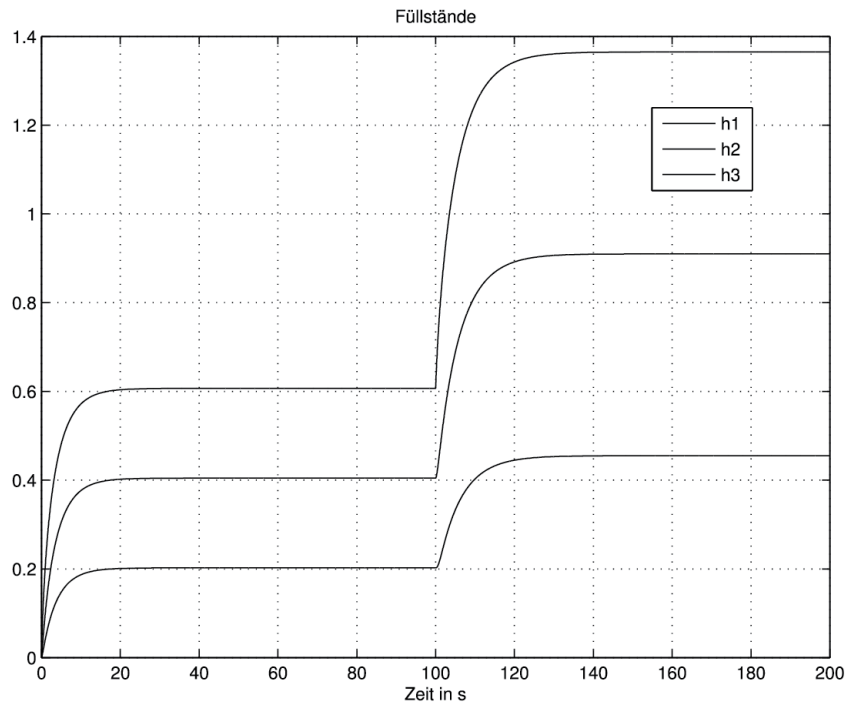

**Abb. 3.17:** Füllstände des Dreitanksystems (fuellstnd\_1.m, fuellstnd1.mdl)

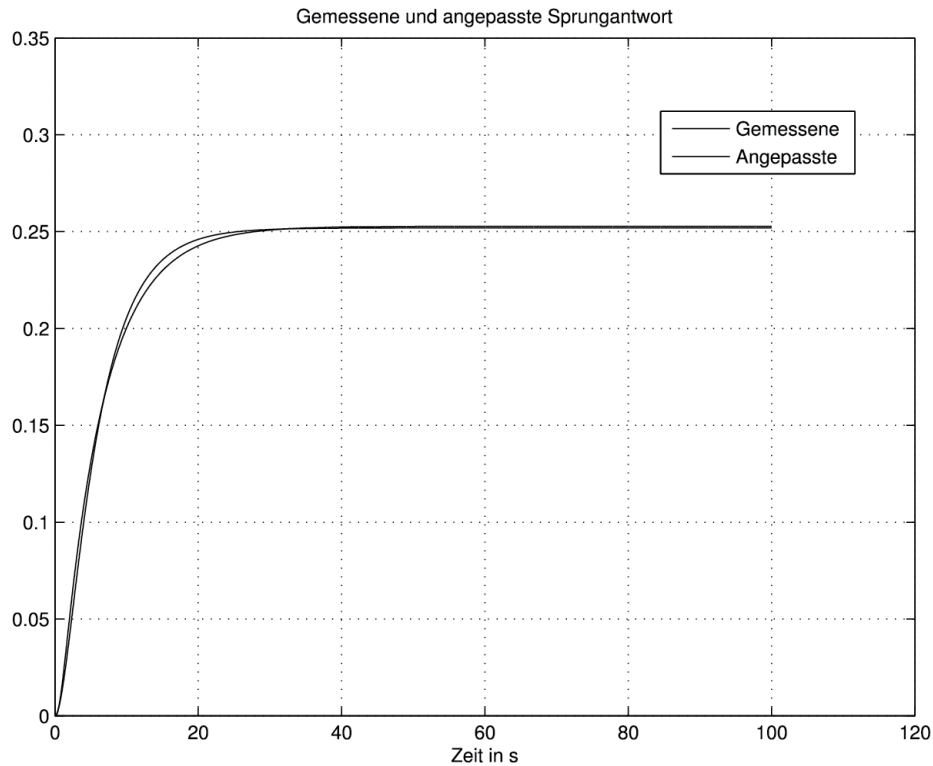

**Abb. 3.18:** Gemessene und angepasste Sprungantwort (fuellstd\_1.m, fuellstd1.mdl)

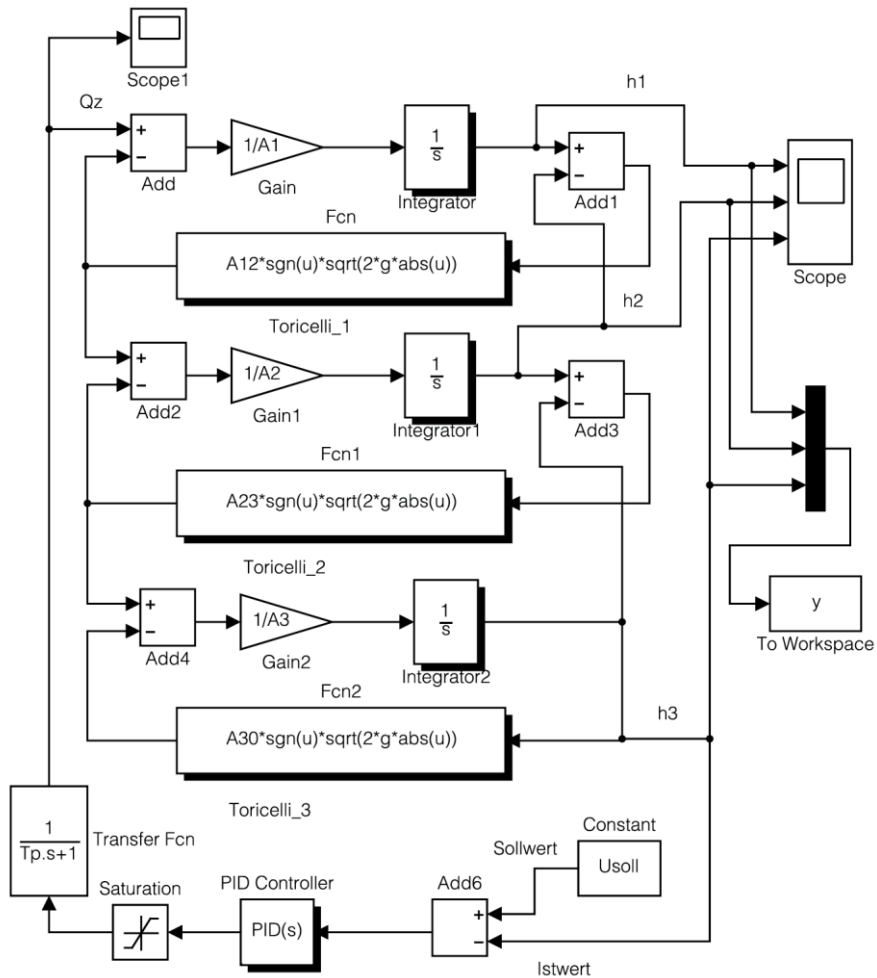

**Abb. 3.19:** Simulink-Modell des Füllstandsregelung (fuellstnd\_2.m, fuellstnd2.mdl)

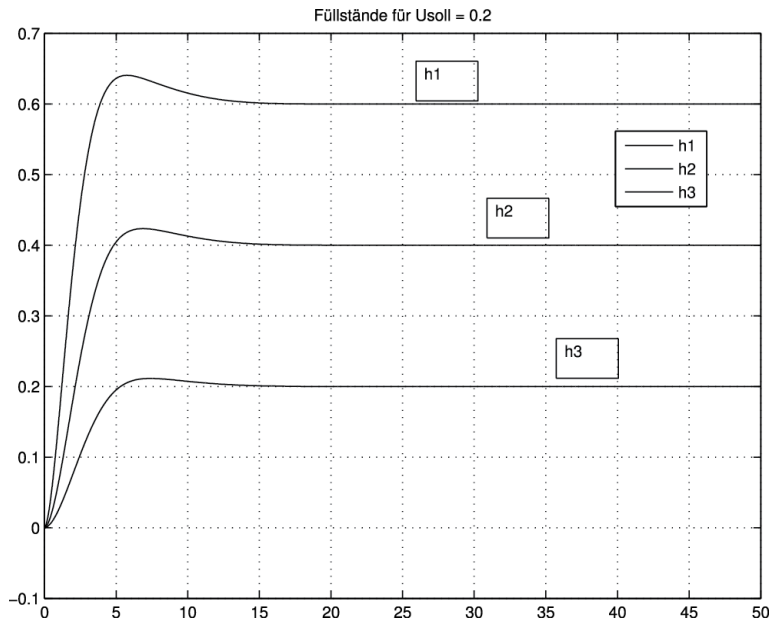

**Abb. 3.20:** Füllstände für  $U_{soll} = 0.2$  (fuellstnd\_2.m, fuellstnd2.mdl)

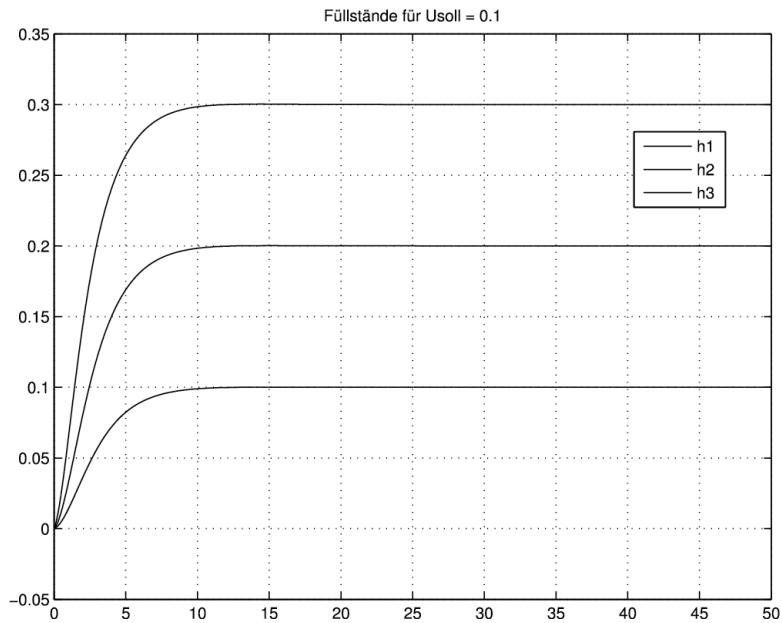

**Abb. 3.21:** Füllstände für  $U_{\text{soll}} = 0.1$  (fuellstnd\_2.m, fuellstnd2.mdl)

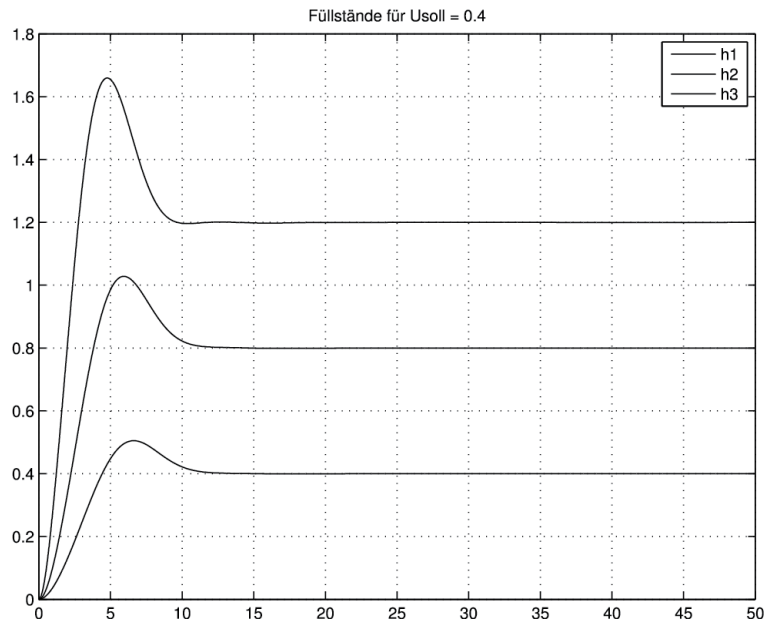

**Abb. 3.22:** Füllstände für  $U_{\text{soll}} = 0.4$  (fuellstnd\_2.m, fuellstnd2.mdl)

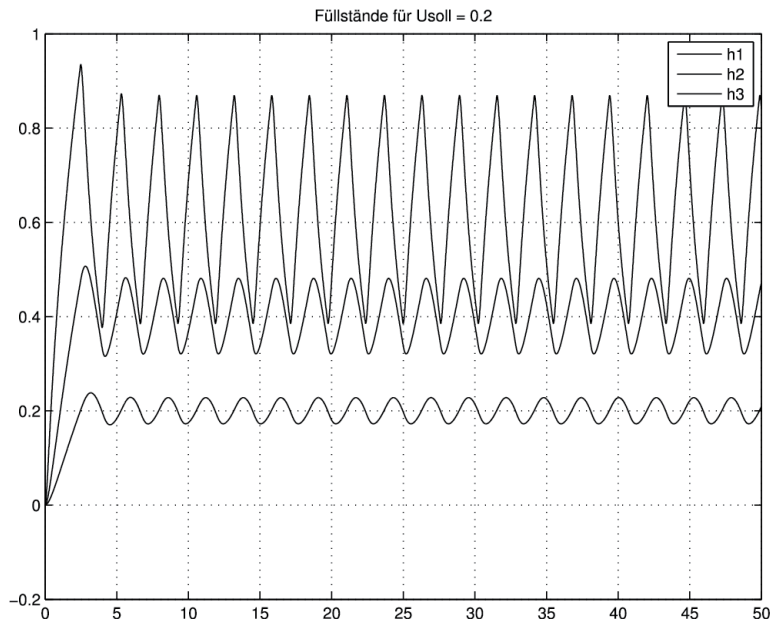

**Abb. 3.23:** Füllstände für  $U_{soll} = 0.2$  und Zweipunktregelung (fuellstnd\_21.m, fuellstnd21.mdl)



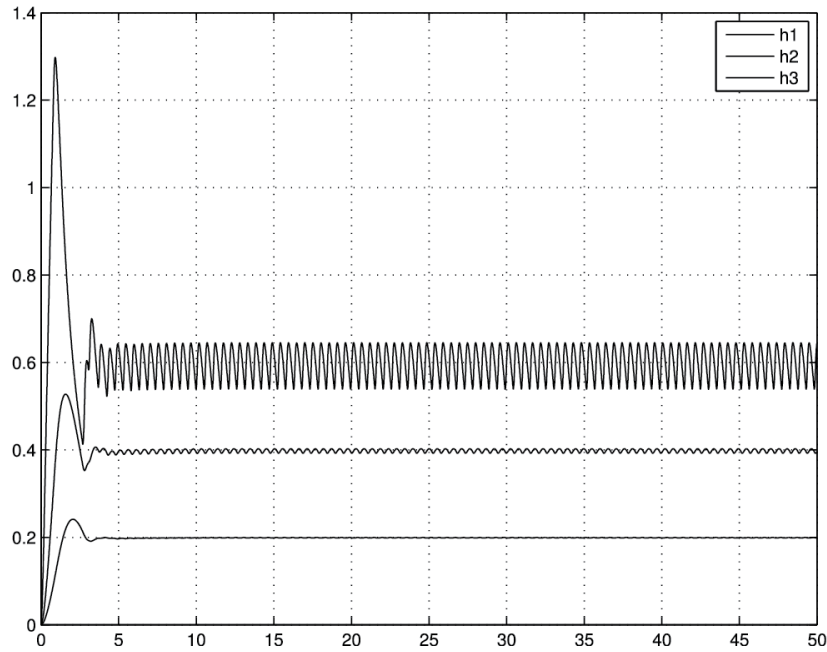

**Abb. 3.24:** Füllstände für  $U_{\text{soll}} = 0.2$  und Zweipunktregelung mit verzögerter und nachgebender Rückführung (fuellstnd\_3.m, fuellstnd3.mdl)

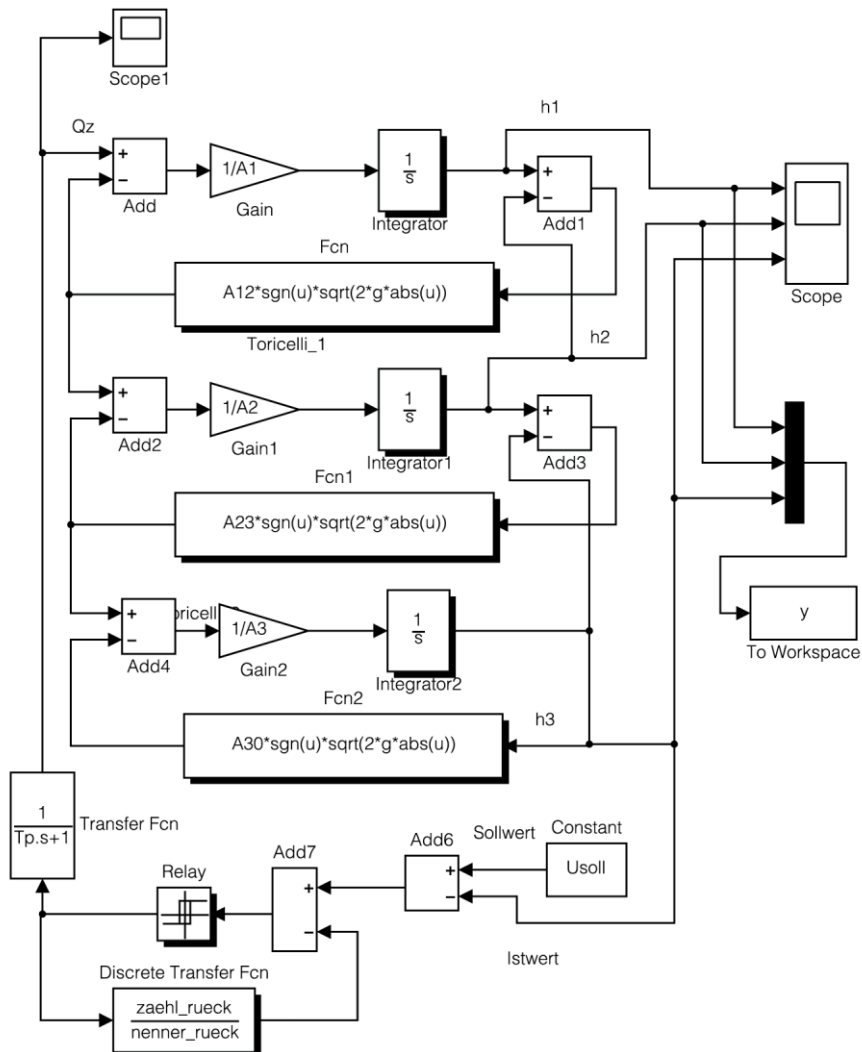

**Abb. 3.25:** Simulink-Modell der Zweipunktregelung mit verzögerter und nachgebender Rückführung (fuellstnd\_3.m, fuellstnd3.mdl)

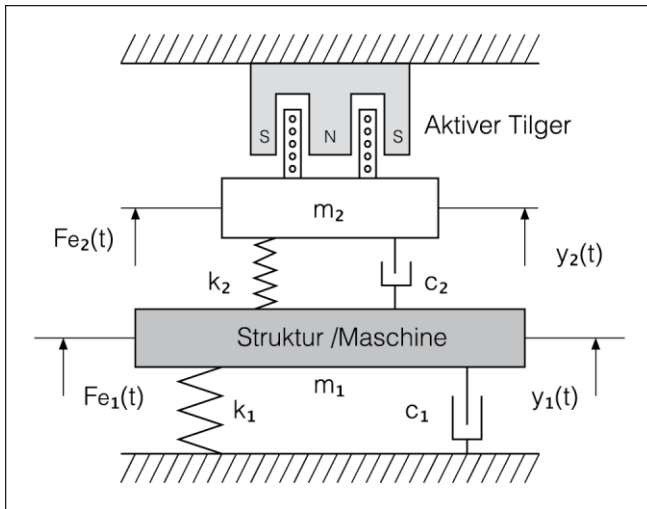

**Abb. 3.26:** Aktives Tilgungssystem

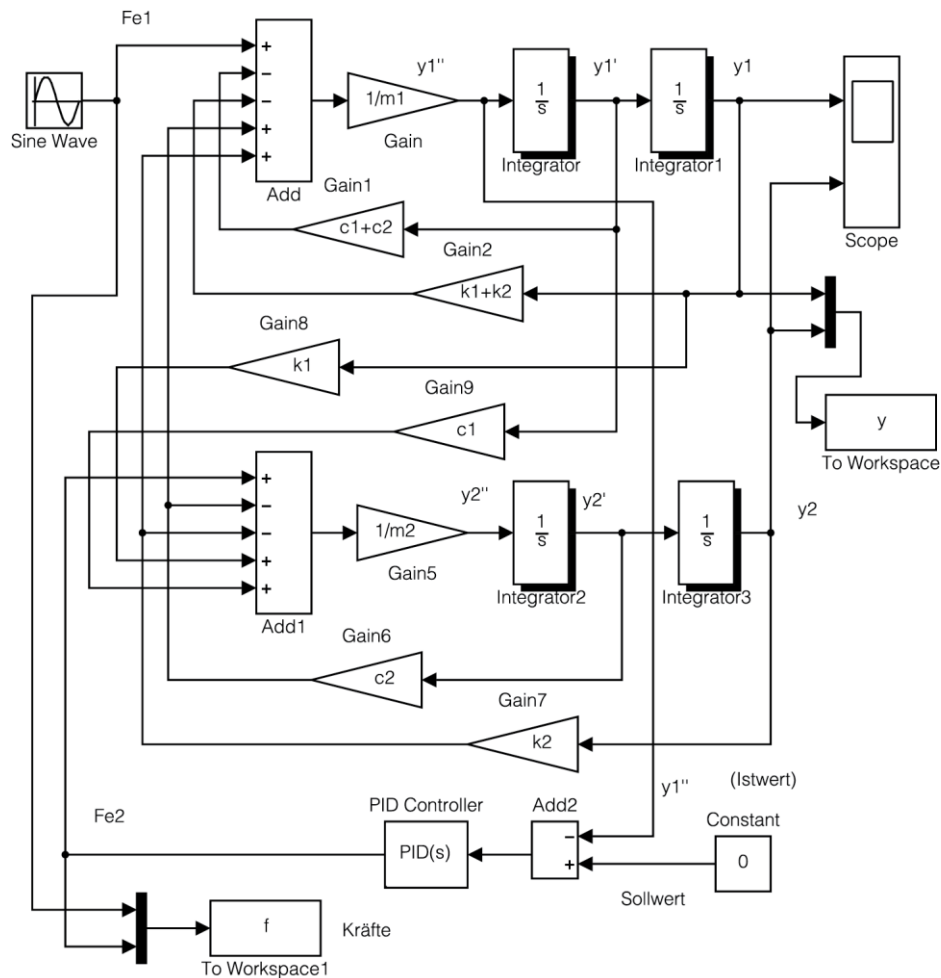

**Abb. 3.27:** Simulink-Modell der aktiven Tilgung (aktiv\_tilger\_1.m, aktiv\_tilger1.m.mdl)

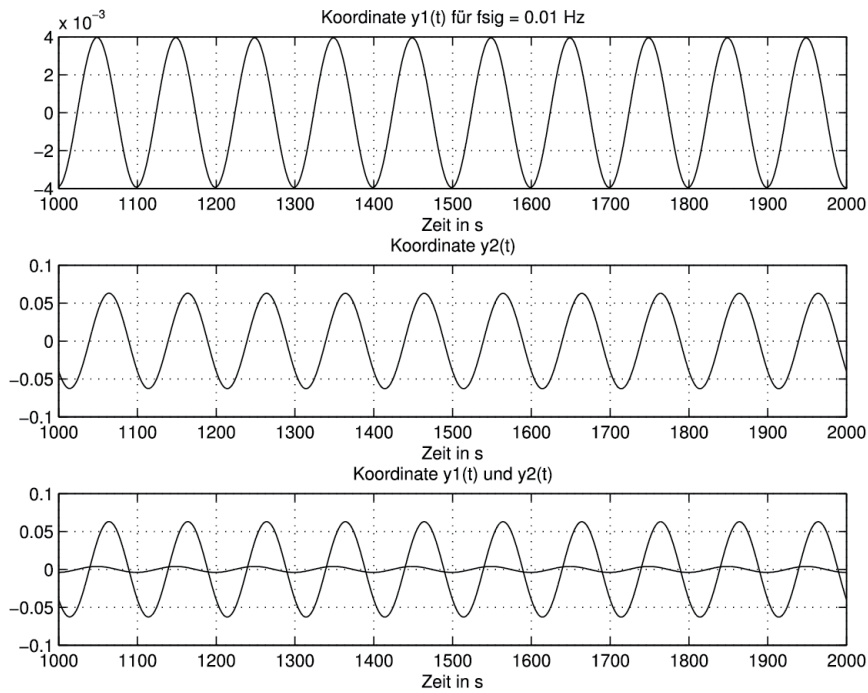

**Abb. 3.28:** a) Bewegung der Struktur ( $y_1(t)$ ) b) Bewegung der Tilgungsmasse ( $y_2(t)$ ) c) Beide Bewegungen (aktiv\_tilger\_1.m, aktiv\_tilger1.m.mdl)

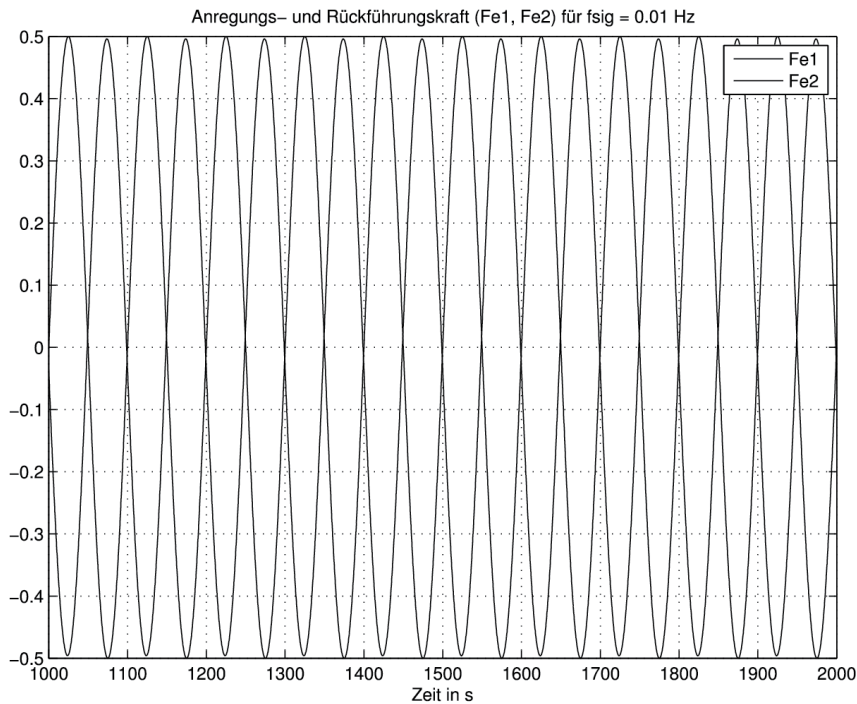

**Abb. 3.29:** Anregungskraft ( $F_{e1}(t)$ ) und aktive Kompensationskraft ( $F_{e2}(t)$ ) (aktiv\_tilger\_1.m, aktiv\_tilger1.m.mdl)

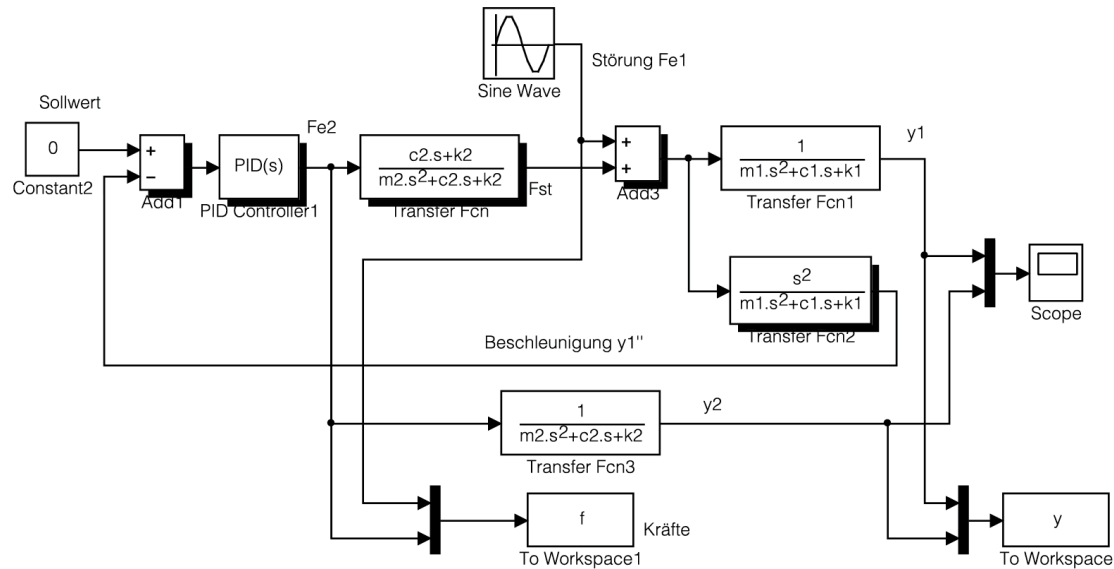

**Abb. 3.30:** Simulink-Modell des vereinfachten Systems (aktiv\_tilger\_12.m, aktiv\_tilger12.m.mdl)

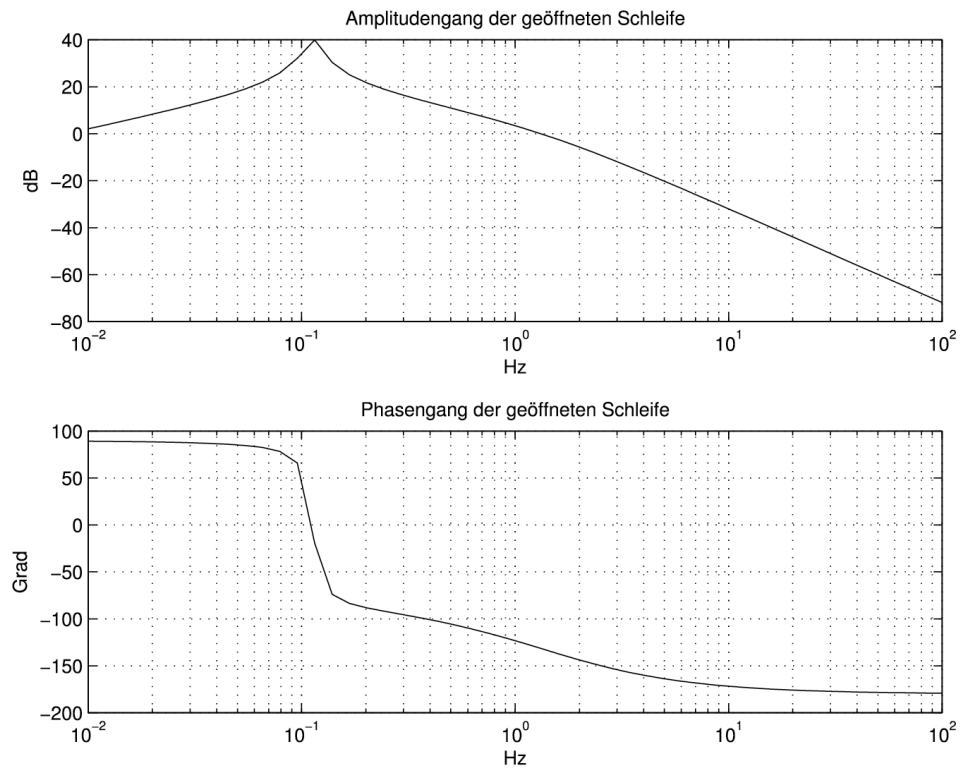

**Abb. 3.31:** Frequenzgang der geöffneten Schleife (aktiv\_tilger\_12.m, aktiv\_tilger12.m.mdl)



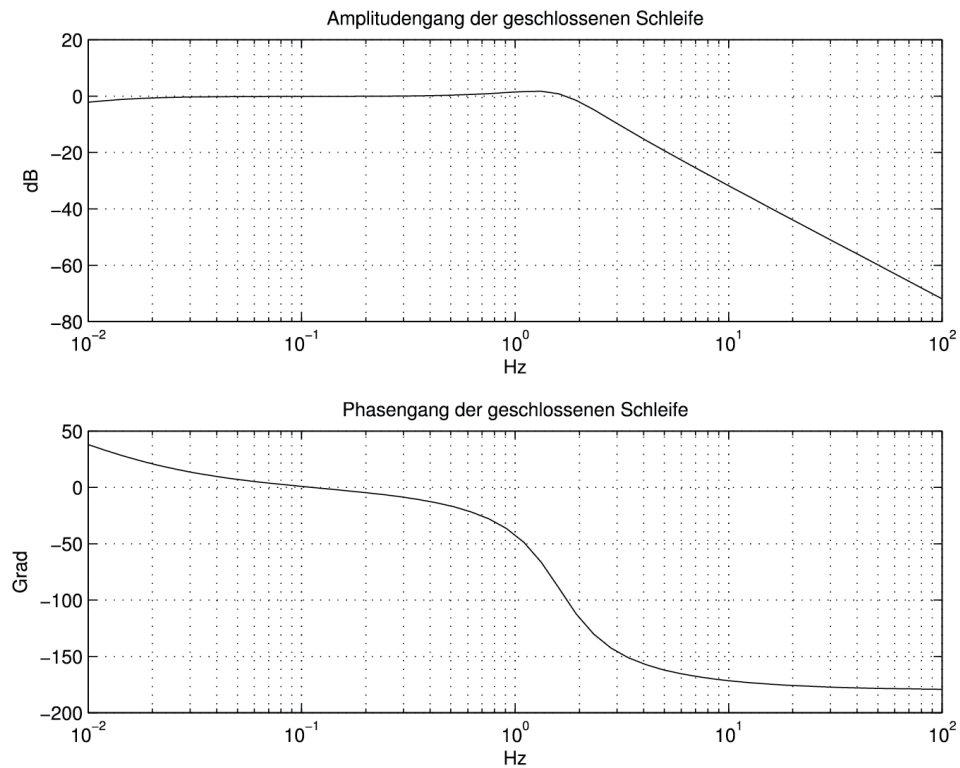

**Abb. 3.32:** Frequenzgang der geschlossenen Schleife (aktiv\_tilger\_12.m, aktiv\_tilger12.m.mdl)

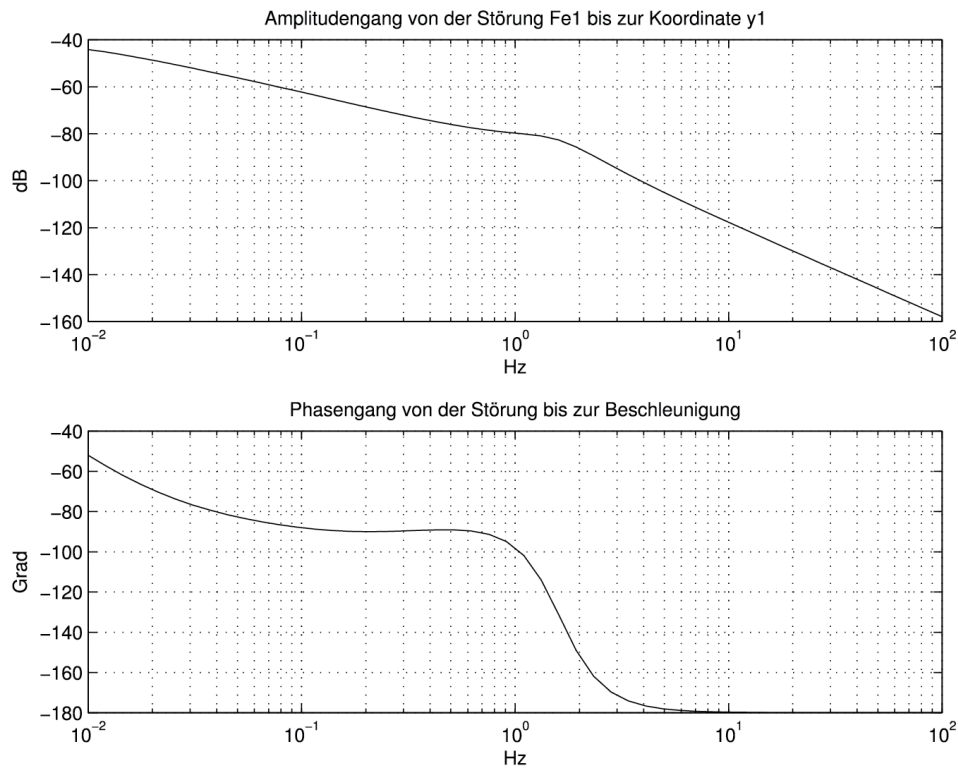

**Abb. 3.33:** Frequenzgang von der Störungskraft  $F_{e1}(t)$  bis zur Lage  $y_1(t)$  (aktiv\_tilger\_12.m, aktiv\_tilger12.m.mdl)

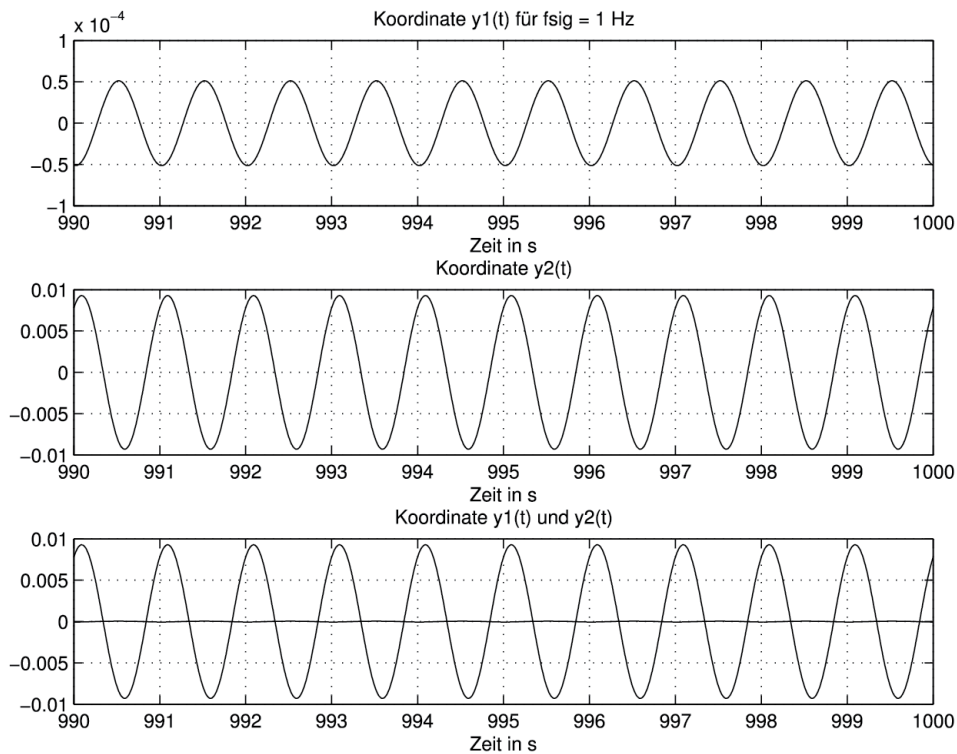

**Abb. 3.34:** Koordinaten der Lage  $y_1(t)$  und der Lage  $y_2(t)$  (aktiv\_tilger\_12.m, aktiv\_tilger12.m.mdl)

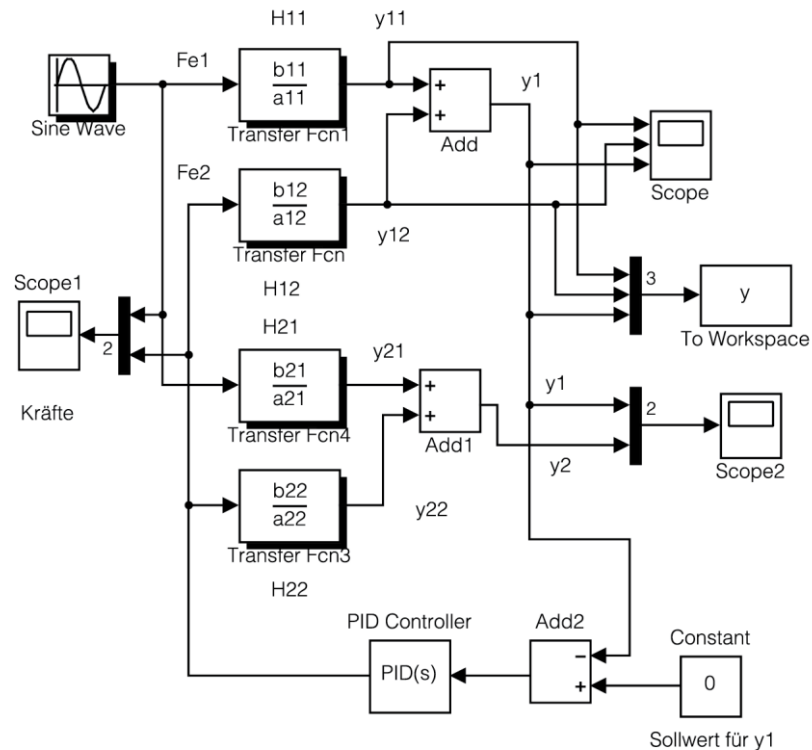

**Abb. 3.35:** Simulink-Modell des Systems modelliert mit Übertragungsfunktionen (aktiv\_tilger\_3.m, aktiv\_tilger3.mdl)

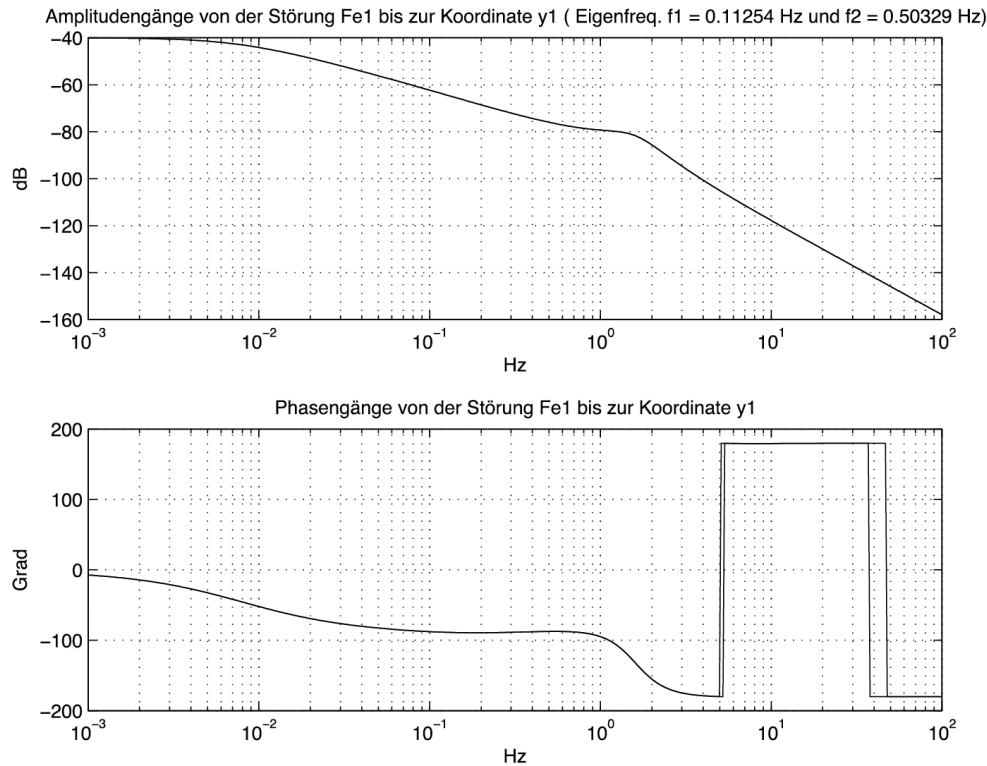

**Abb. 3.36:** Frequenzgänge von der Störung  $F_{e1}(t)$  bis zur Koordinate der Lage  $y_1(t)$  mit und ohne Vereinfachungen (aktiv\_tilger\_3.m, aktiv\_tilger3.mdl)

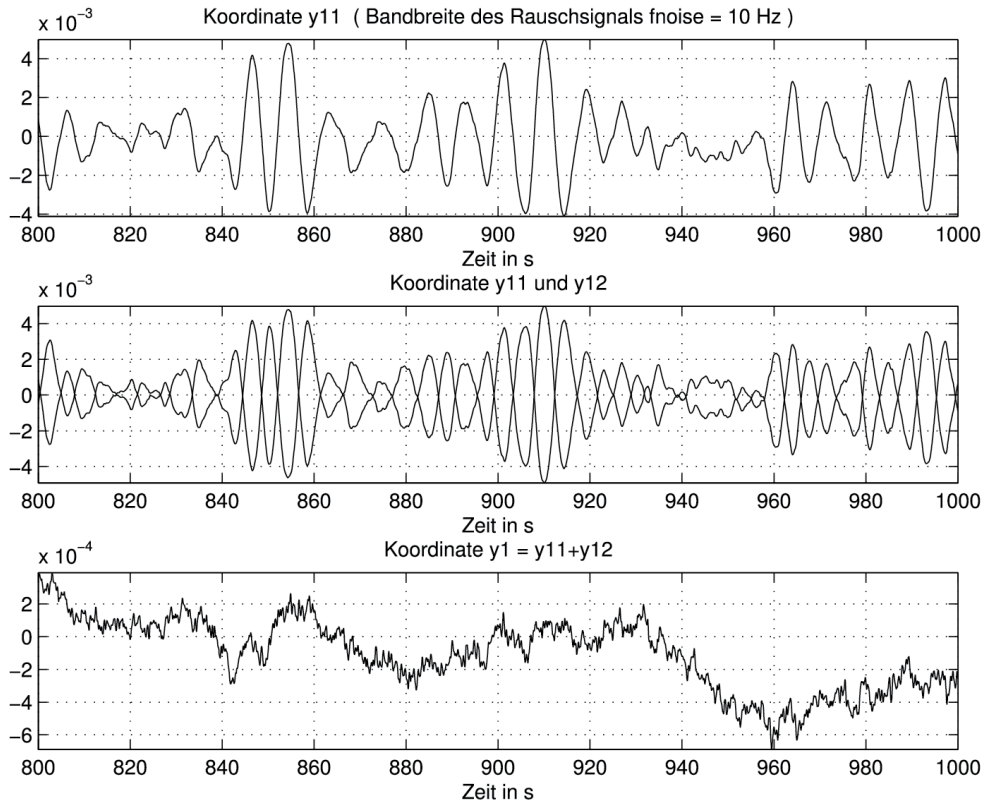

**Abb. 3.37:** Signale der Simulation für zufälliger Anregungskraft  $F_{e1}(t)$  (aktiv\_tilger\_3.m, aktiv\_tilger3.mdl)

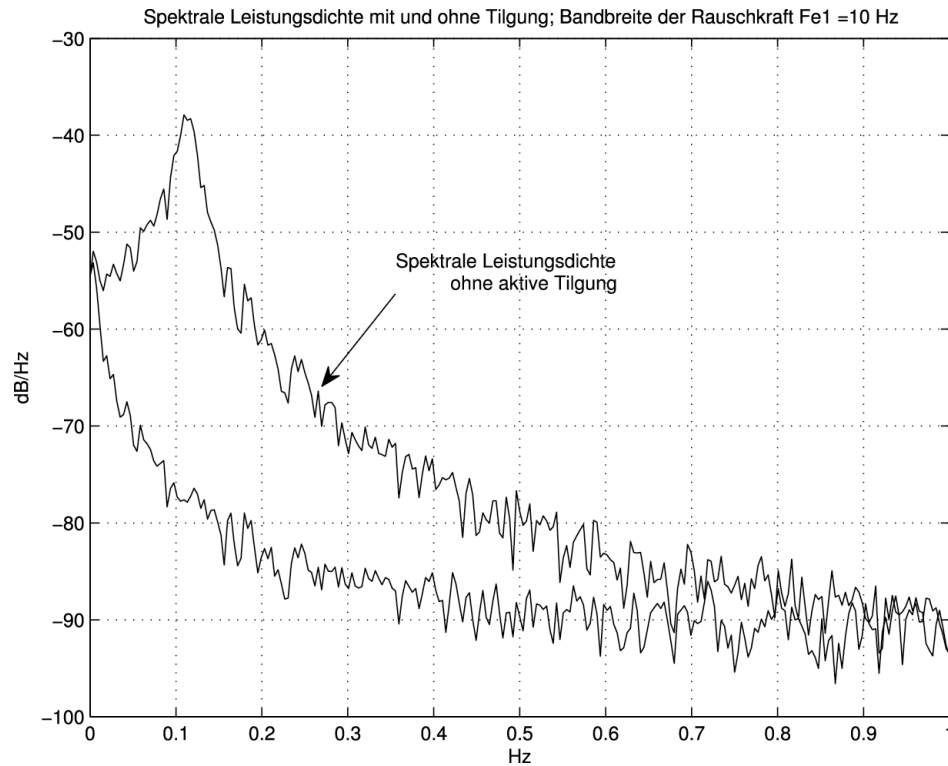

**Abb. 3.38:** Spektralen Leistungsdichten für zufällige Anregungskraft  $F_{e1}(t)$  mit und ohne aktive Tilgung (aktiv\_tilger\_3.m, aktiv\_tilger3.mdl)

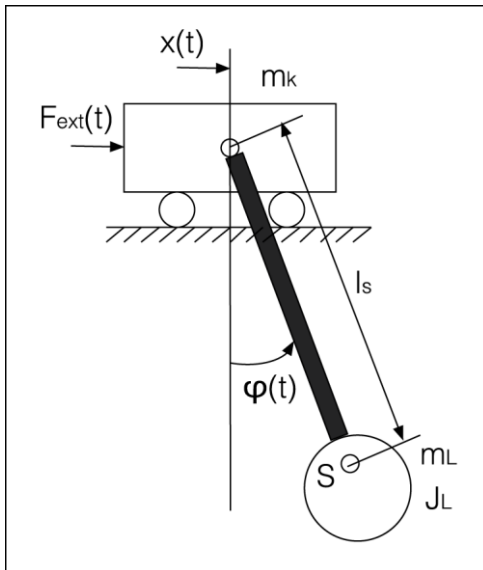

**Abb. 3.39:** Laufkatze mit Pendellast



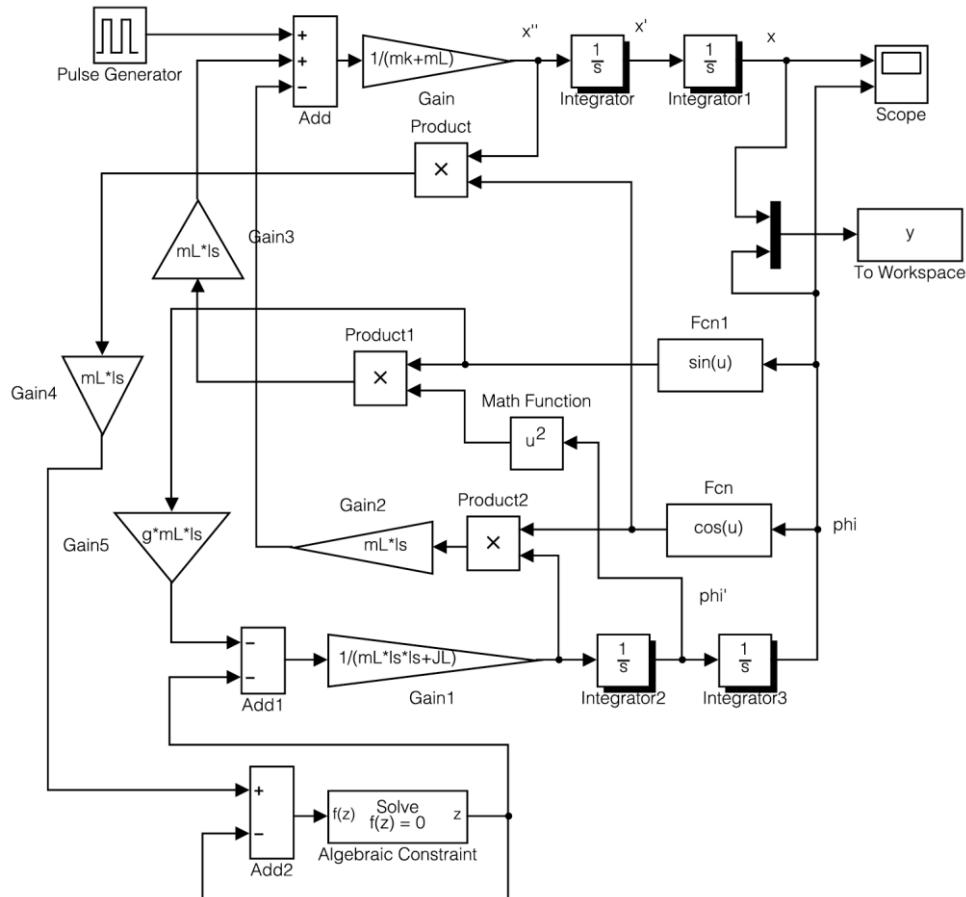

**Abb. 3.40:** Simulink-Modell der Laufkatze mit Pendellast (laufkatze\_1.m, laufkatze1.mdl)

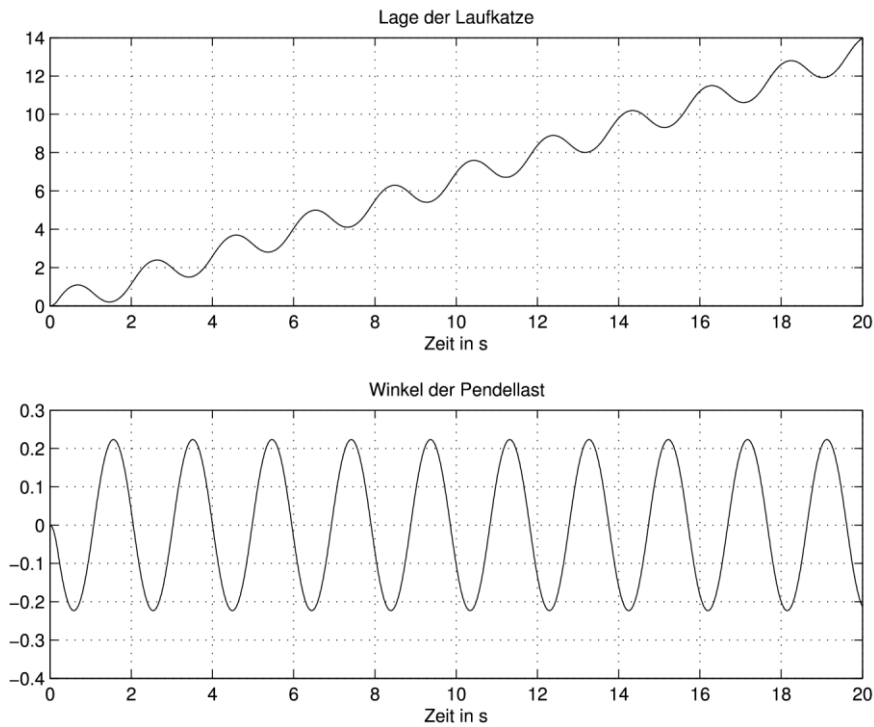

**Abb. 3.41:** Koordinate  $x(t)$  der Laufkatze und Winkel  $\varphi(t)$  des Pendels (laufkatze\_1.m, laufkatze1.mdl)

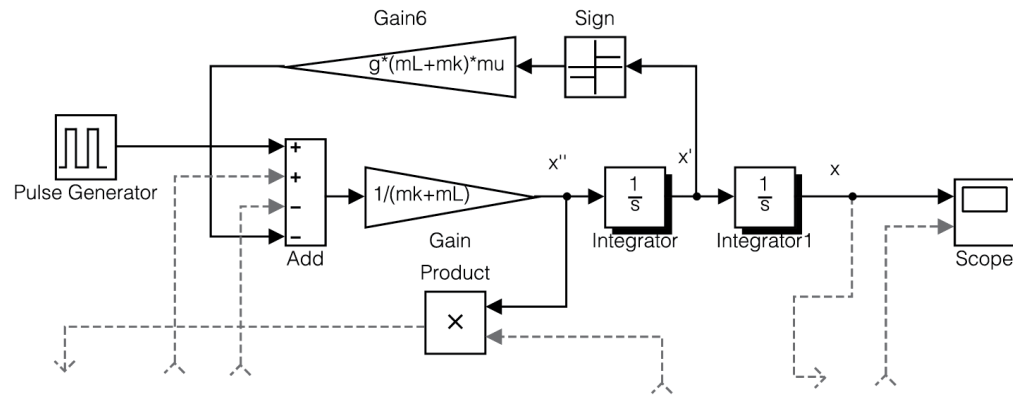

**Abb. 3.42:** Modelländerung für den Fall mit Gleitreibung (laufkatze\_10.m, laufkatze10.mdl)

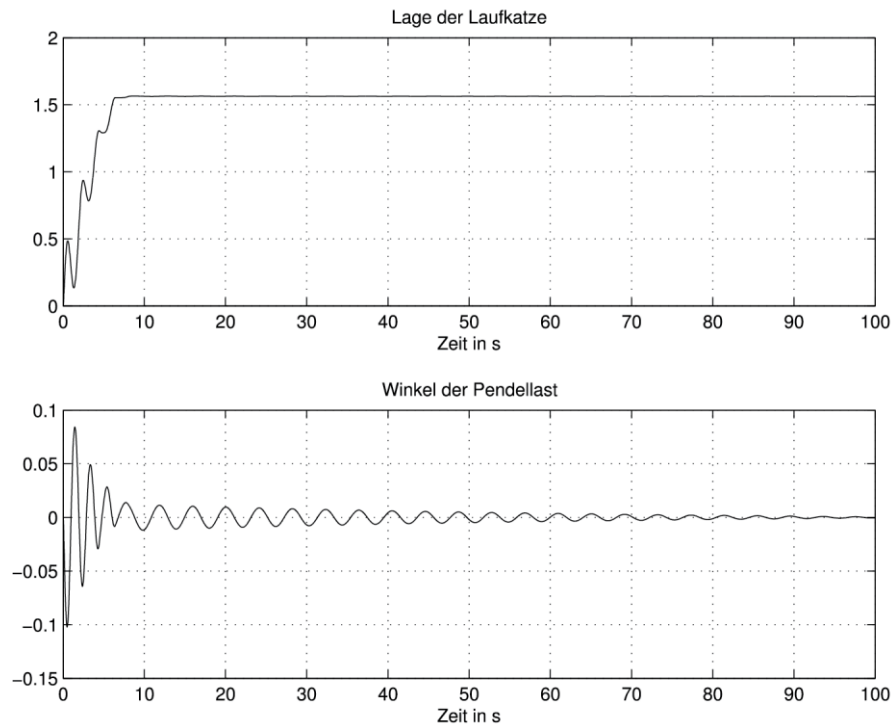

**Abb. 3.43:** Koordinate  $x(t)$  der Laufkatze und Winkel  $\varphi(t)$  des Pendels für den Fall mit Gleitreibung (laufkatze\_10.m, laufkatze10.mdl)

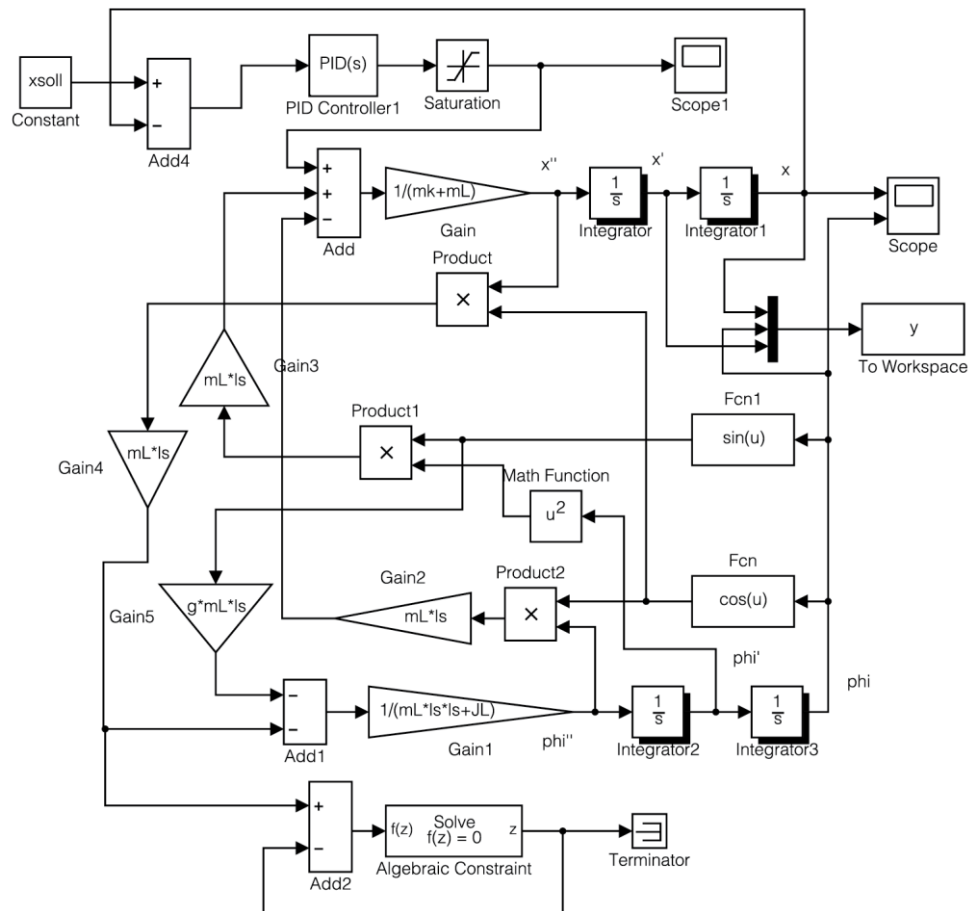

**Abb. 3.44:** Simulink-Modell der Positionsregelung der Laufkatze ohne Reibung (laufkatze\_2.m, laufkatze2.mdl)

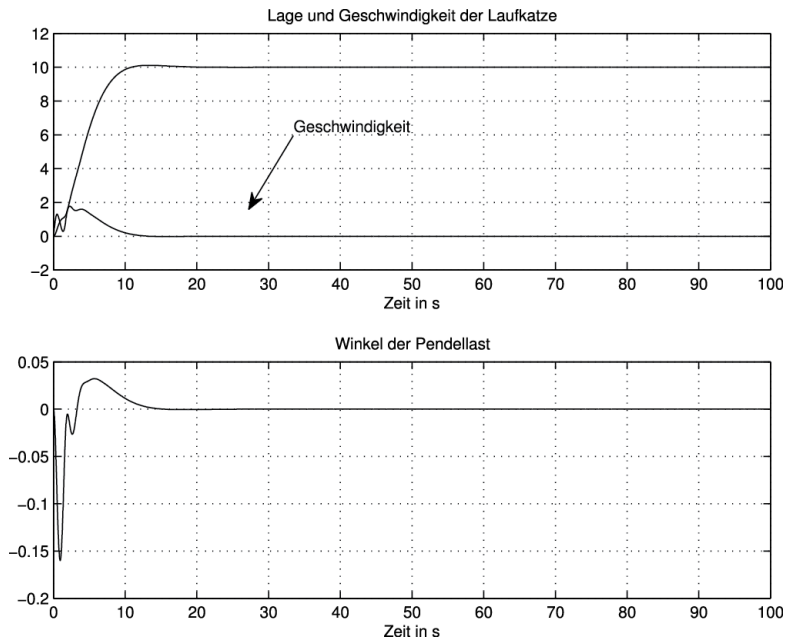

**Abb. 3.45:** Koordinate der Lage und die Geschwindigkeit der Laufkatze zusammen mit dem Winkel des Pendels (laufkatze\_2.m, laufkatze2.mdl)

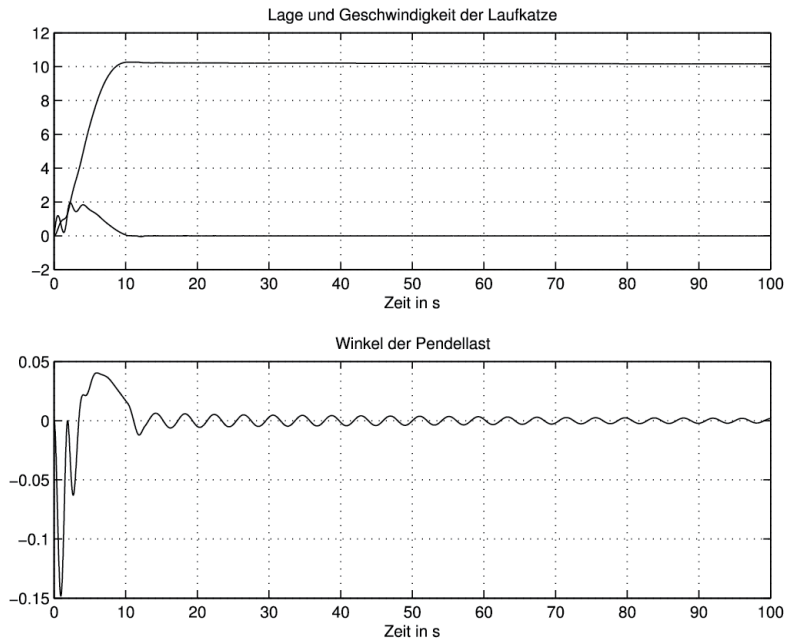

**Abb. 3.46:** Koordinate der Lage und die Geschwindigkeit der Laufkatze zusammen mit dem Winkel des Pendels für den Fall mit Gleitreibung (laufkatze\_20.m, laufkatze20.mdl)

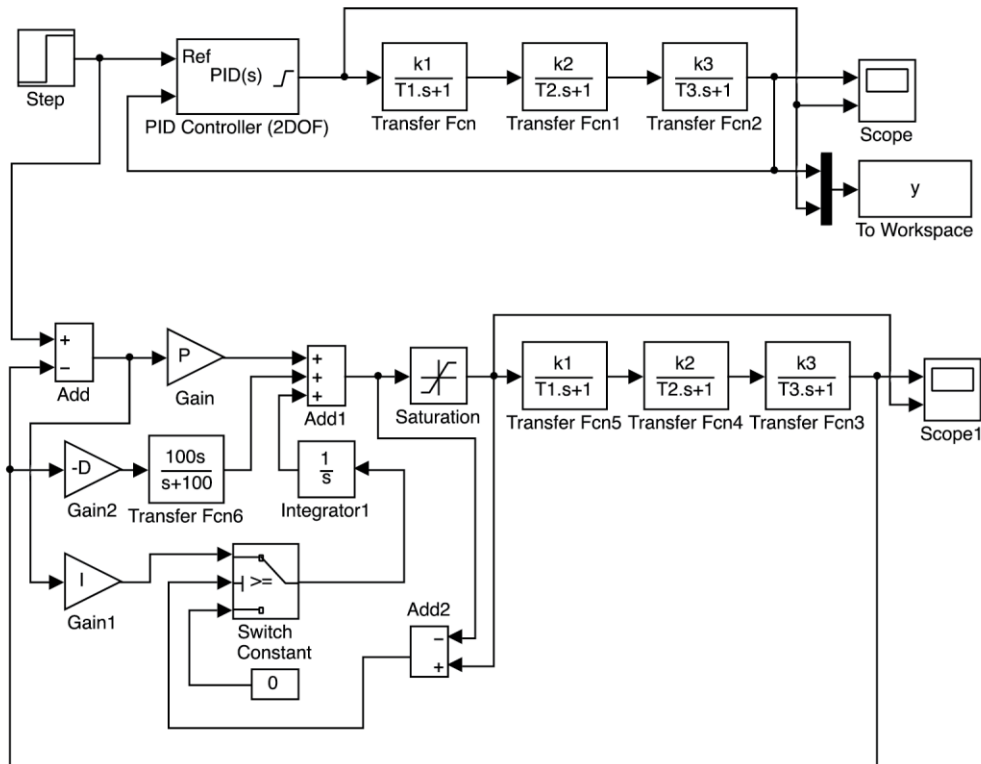

**Abb. 3.47:** Simulink-Modell des Systems mit Anti-Windup über die *Clamping*-Lösung (PID\_windup1.m, PID\_windup\_1.mdl)



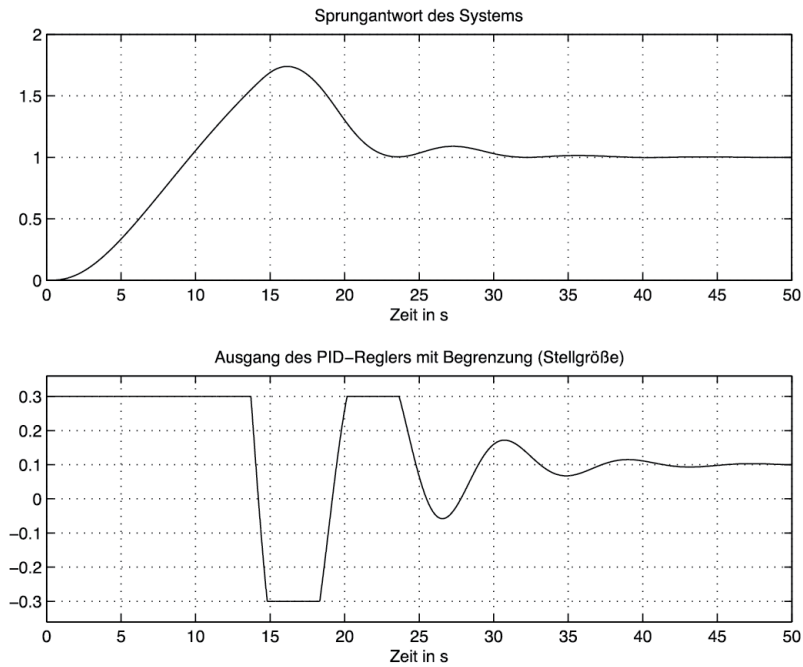

**Abb. 3.48:** Sprungantwort ohne Anti-Windup (PID\_windup1.m, PID\_windup\_1.mdl)

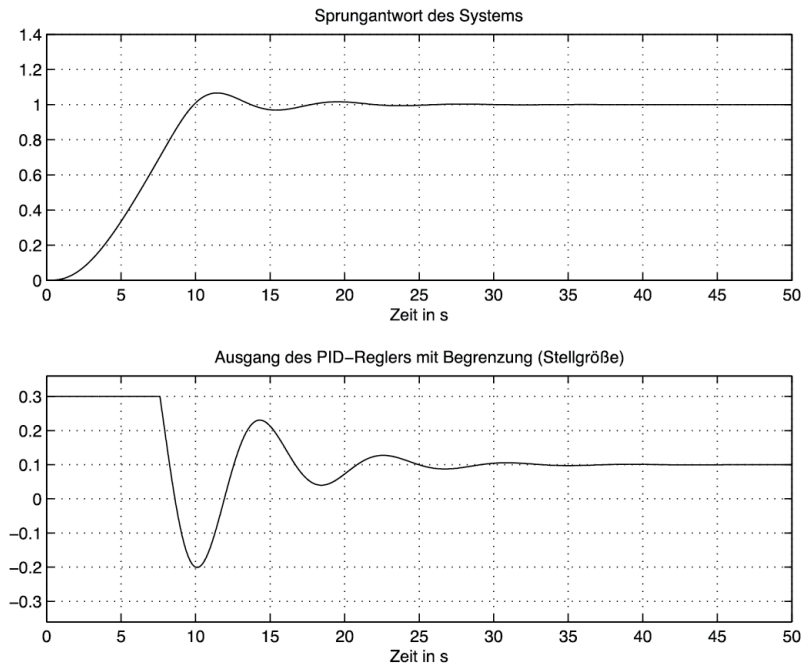

**Abb. 3.49:** Sprungantwort mit Anti-Windup und *Clamping*-Lösung (PID\_windup1.m, PID\_windup\_1.mdl)

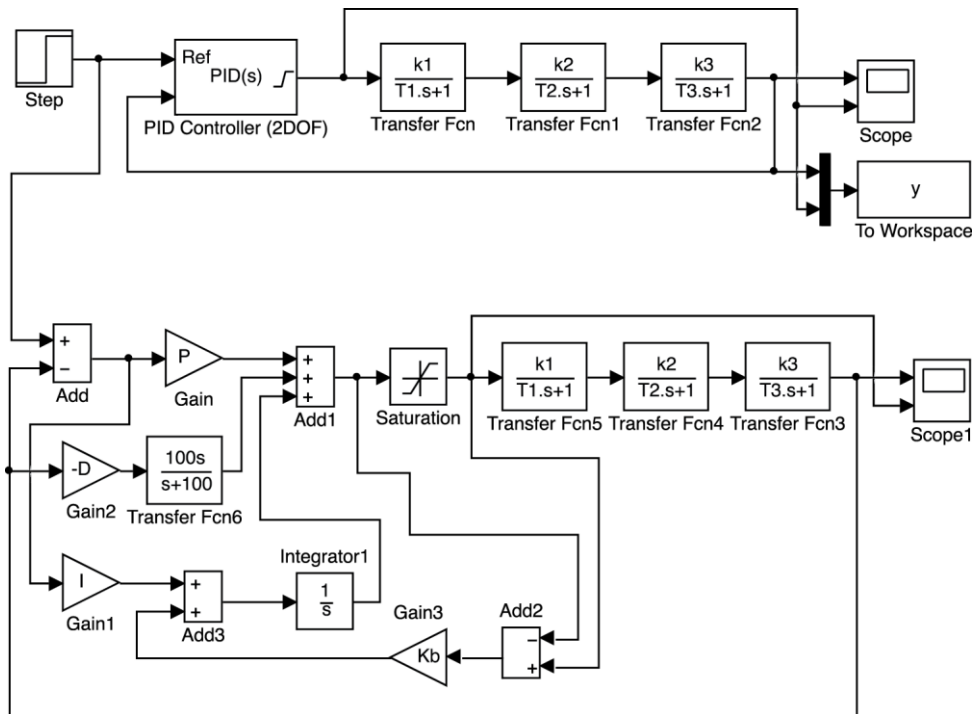

**Abb. 3.50:** Simulink-Modell des Systems mit Anti-Windup über die *Back-Calculation*-Lösung (PID\_windup1.m, PID\_windup\_11.mdl)

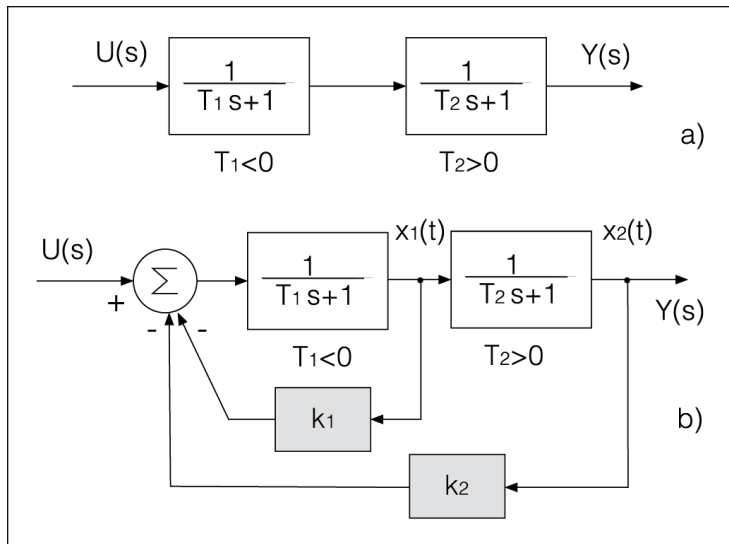

**Abb. 3.51:** a) Beispiel für einen Prozess, dessen Pole mit Hilfe der Struktur b) an beliebiger Stelle zu platzieren sind

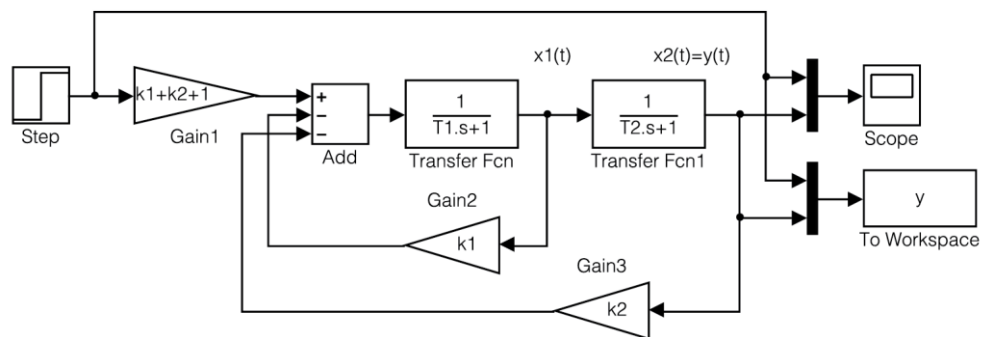

**Abb. 3.52:** Simulink-Modell für das System mit Rückkopplung für die Polplatzierung (pol\_1.m, pol1.mdl)

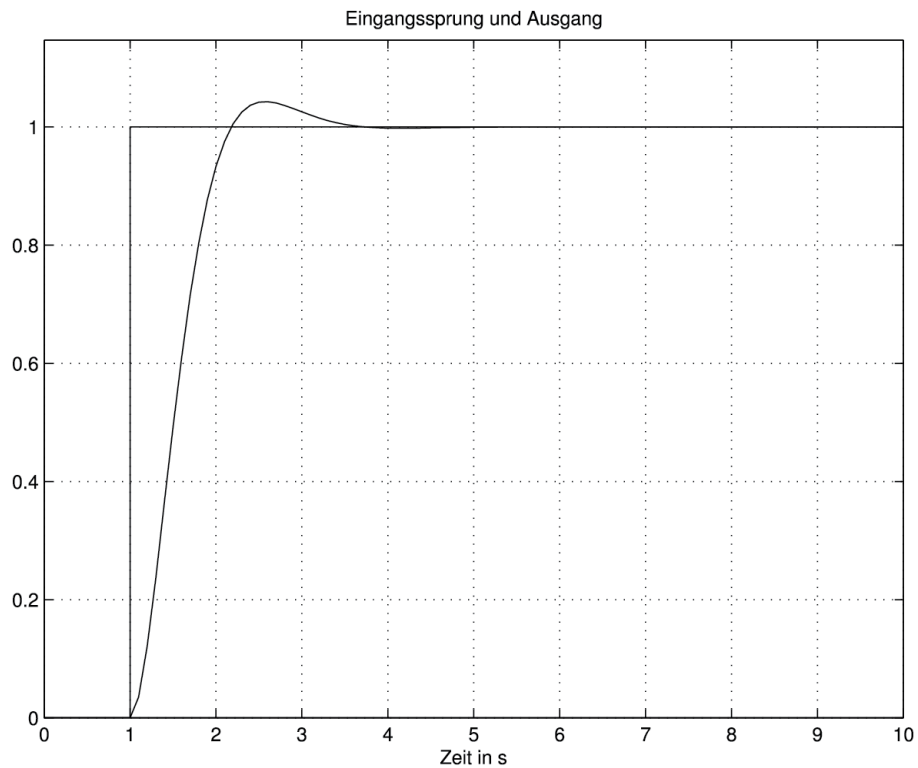

**Abb. 3.53:** Die Sprungantwort des Systems mit Polplatzierung (pol\_1.m, pol1.mdl)

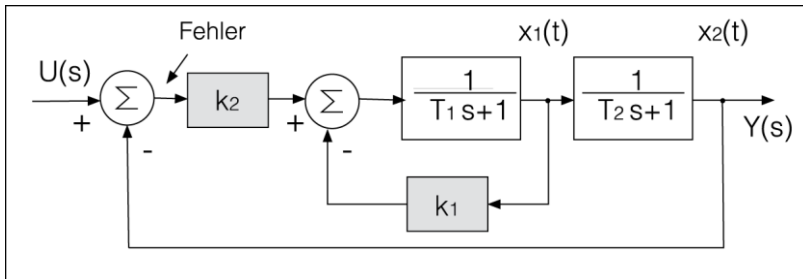

**Abb. 3.54:** Das durch Polplatzierung korrigierte System als Regelungssystem aufgebaut

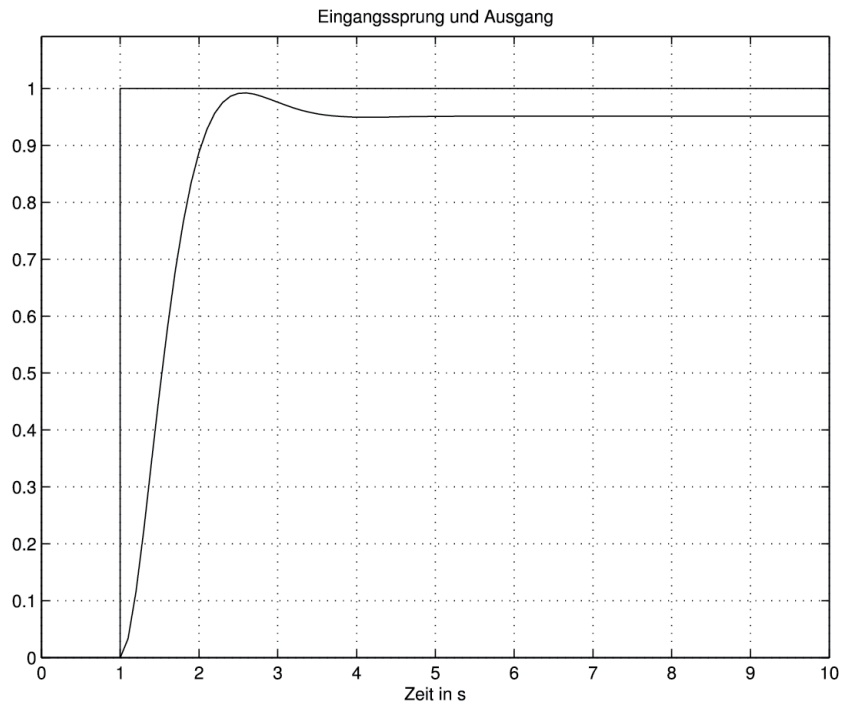

**Abb. 3.55:** Die Sprungantwort des korrigierten Systems als Regelungssystem aufgebaut (pol\_2.m, pol2.mdl)



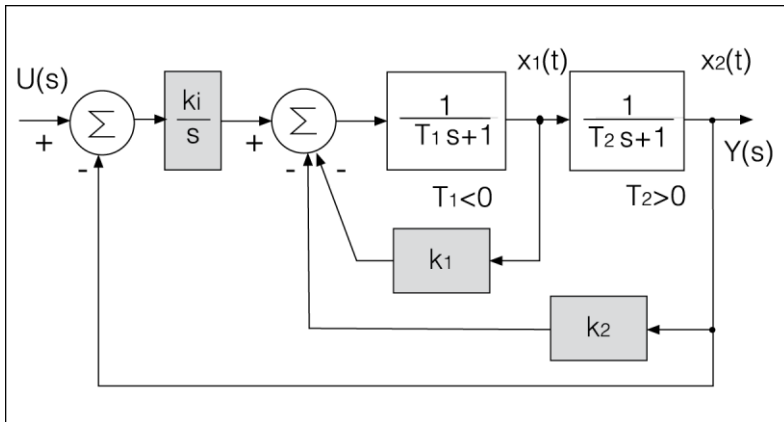

**Abb. 3.56:** Struktur des korrigierten Systems als Regelungssystem mit I-Anteil aufgebaut

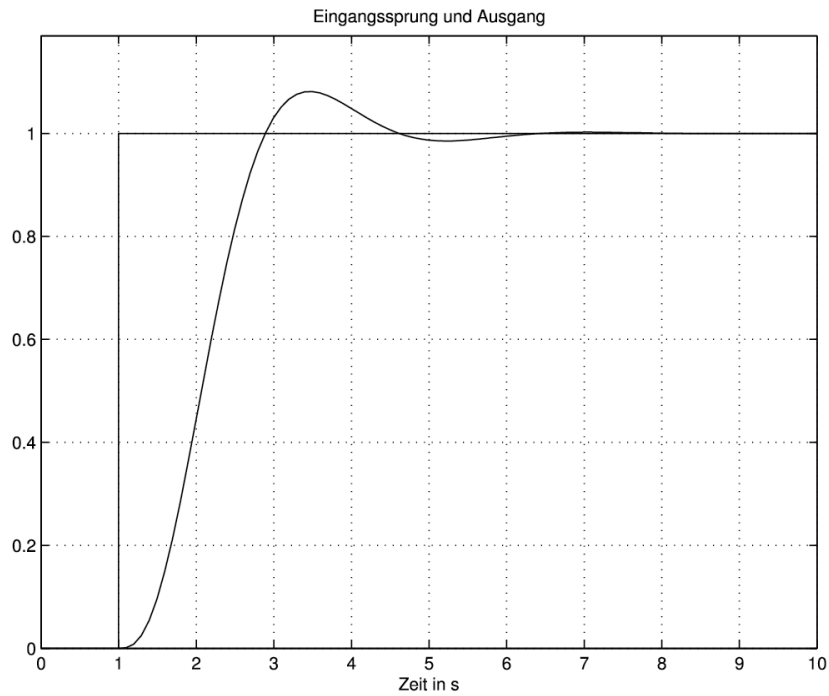

**Abb. 3.57:** Die Sprungantwort des korrigierten Systems als Regelungssystem mit I-Anteil aufgebaut (pol\_3.m, pol3.mdl)

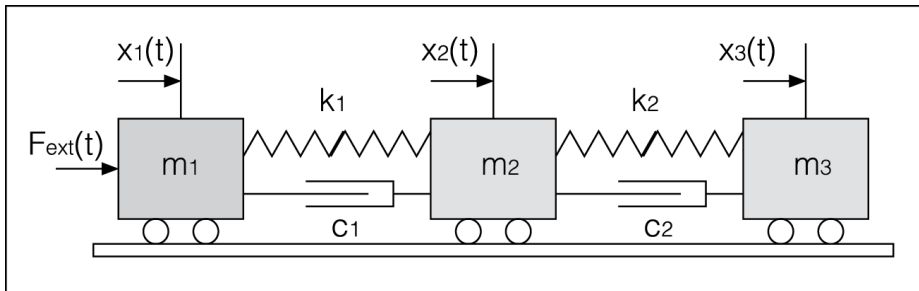

**Abb. 3.58:** Prozess für das Servosystem

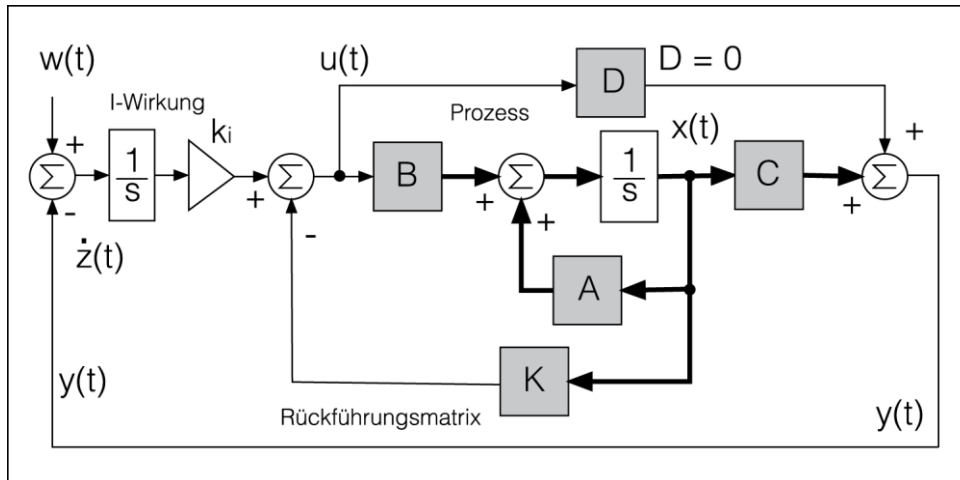

**Abb. 3.59:** Struktur des Servosystems mit Rückführung für die Polplatzierung und I-Wirkung (pol\_4.m, pol4.mdl)

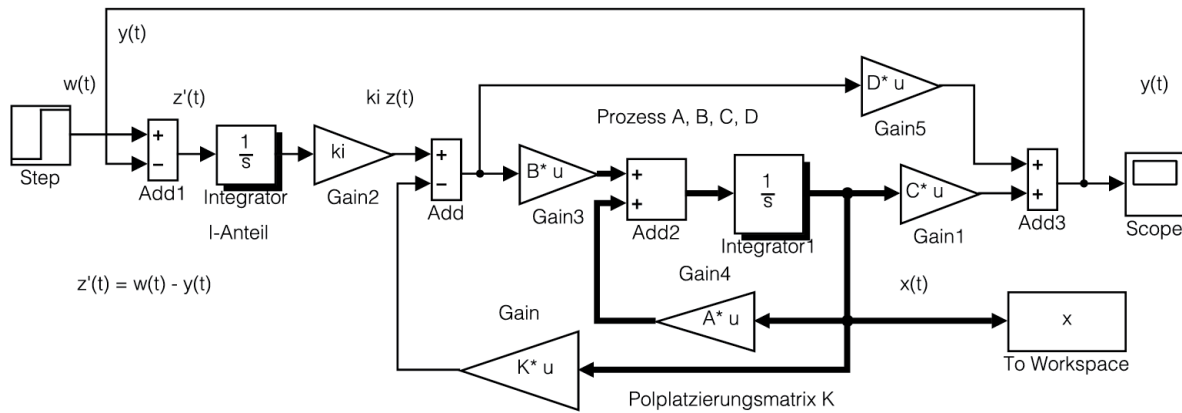

**Abb. 3.60:** Simulink-Modell für das Servosystem mit Rückkopplung für die Polplatzierung und I-Wirkung (pol\_4.m, pol4.mdl)

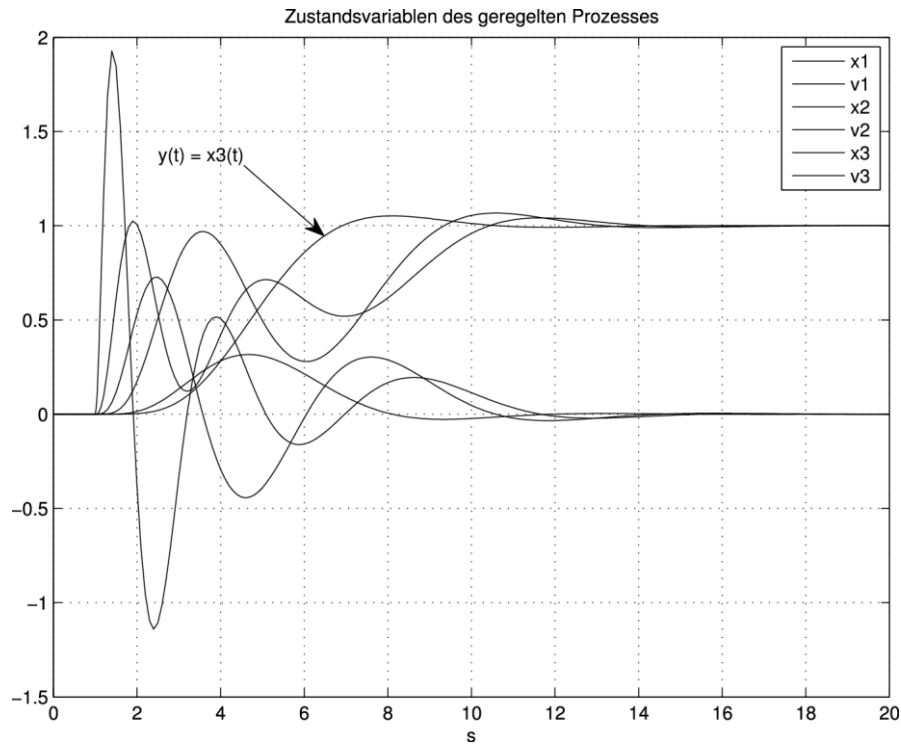

**Abb. 3.61:** Die sechs Zustandsvariablen des geregelten Prozesses (pol\_4.m, pol4.mdl)

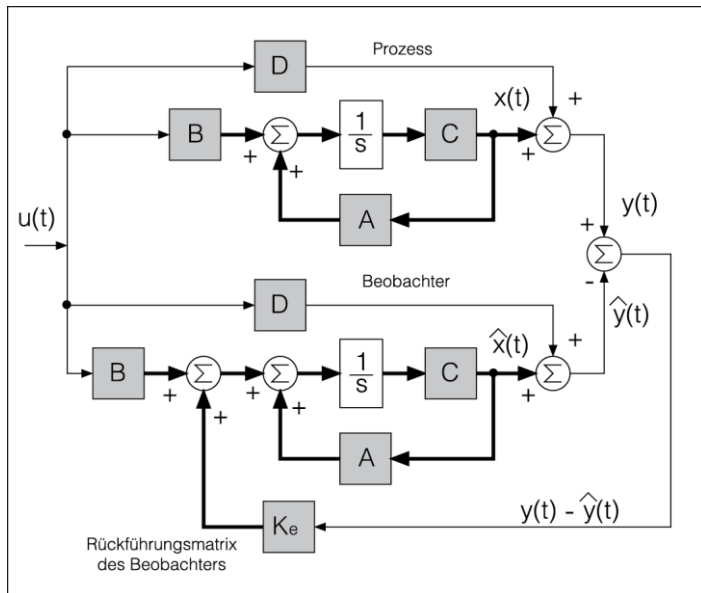

**Abb. 3.62:** Struktur eines Beobachters

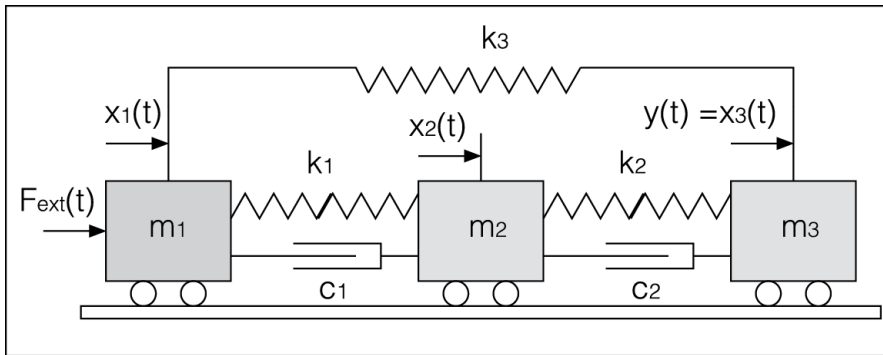

**Abb. 3.63:** Prozess der beobachtbar ist



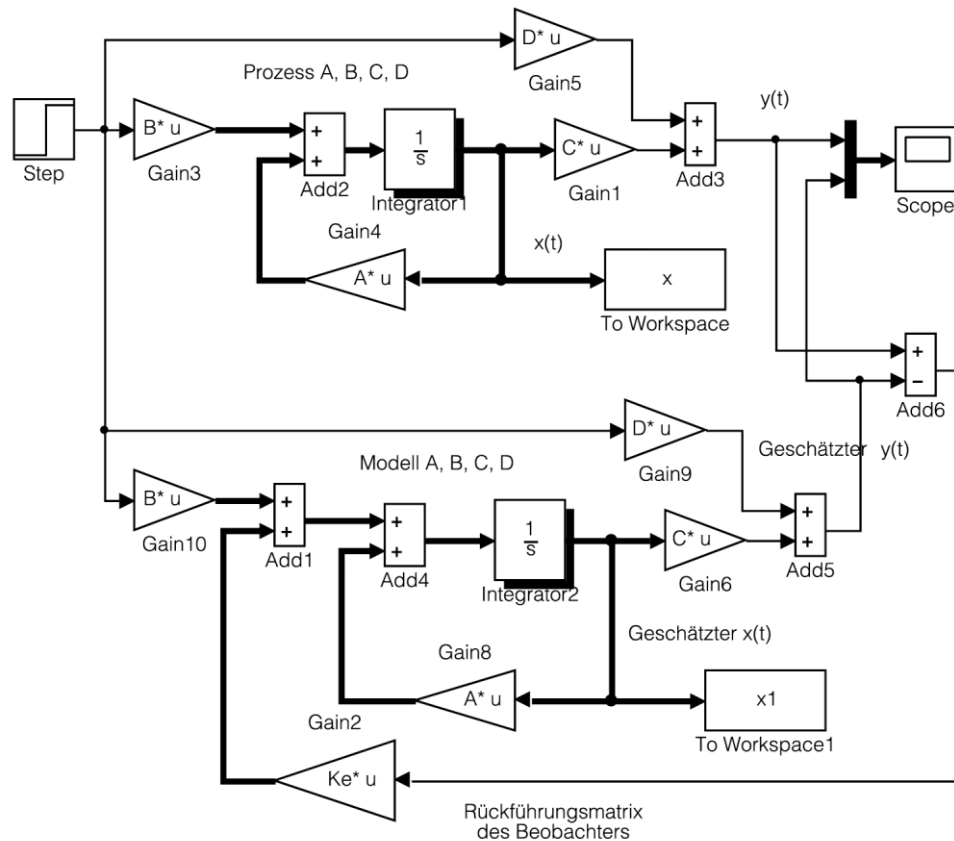

**Abb. 3.64:** Simulink-Modell für den Prozess mit Beobachter (beobachter\_1.m, beobachter1.mdl)

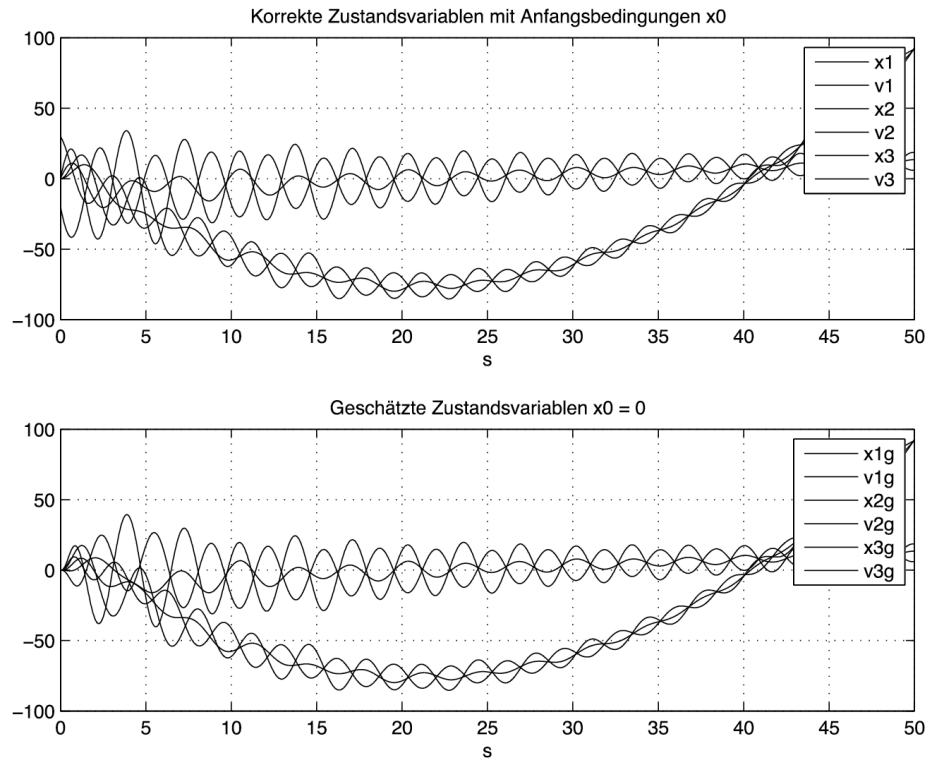

**Abb. 3.65:** Korrekte und geschätzte Zustandsvariablen (beobachter\_1.m, beobachter1.mdl)

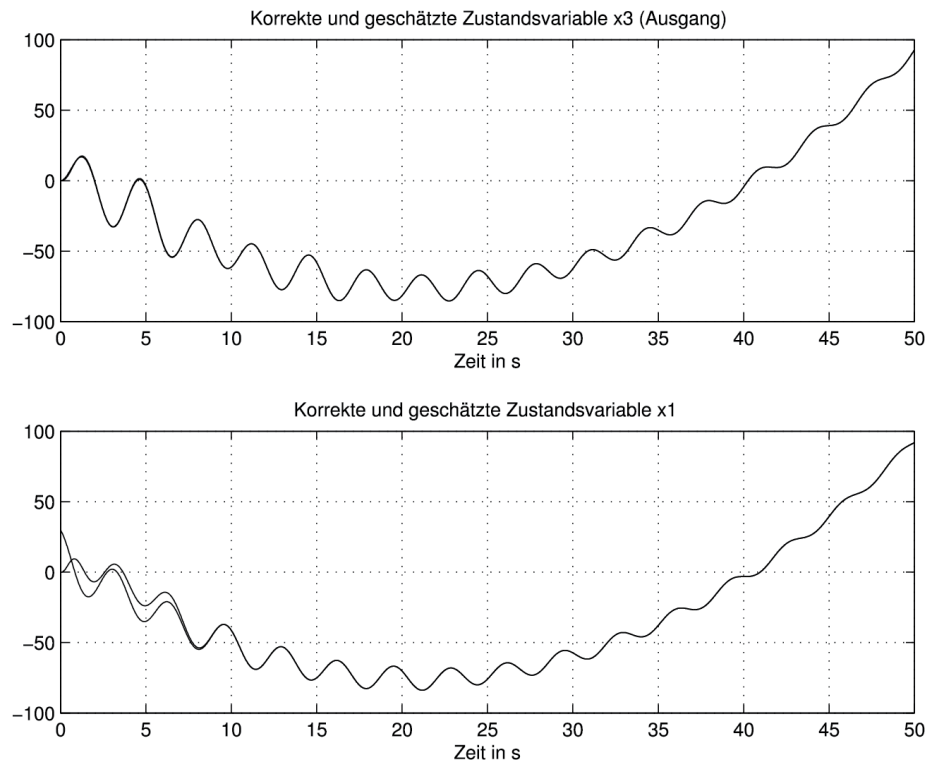

**Abb. 3.66:** Korrekte und geschätzte Zustandsvariable  $y(t) = x_3(t)$  bzw.  $x_1(t)$  (beobachter\_1.m, beobachter1.mdl)

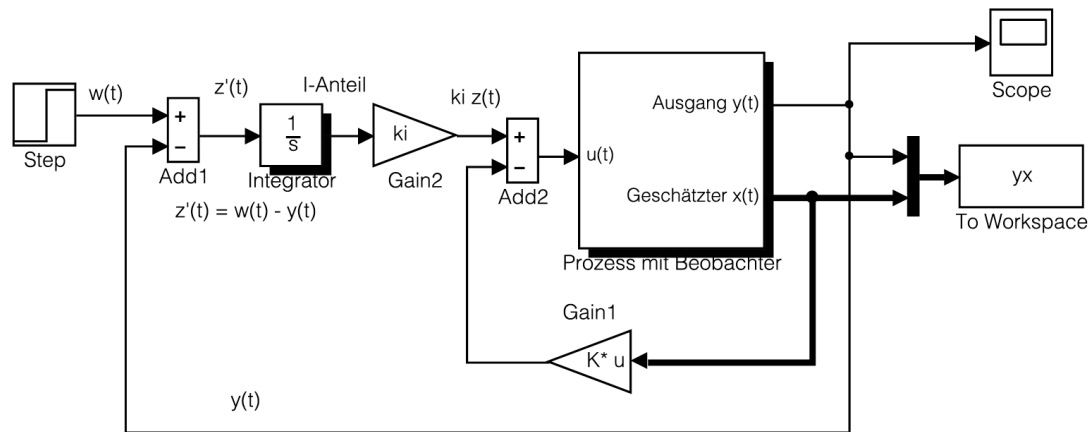

**Abb. 3.67:** Simulink-Modell für den Prozess mit Beobachter und Positionsregelung mit I-Anteil (beobachter\_2.m, beobachter21.mdl)

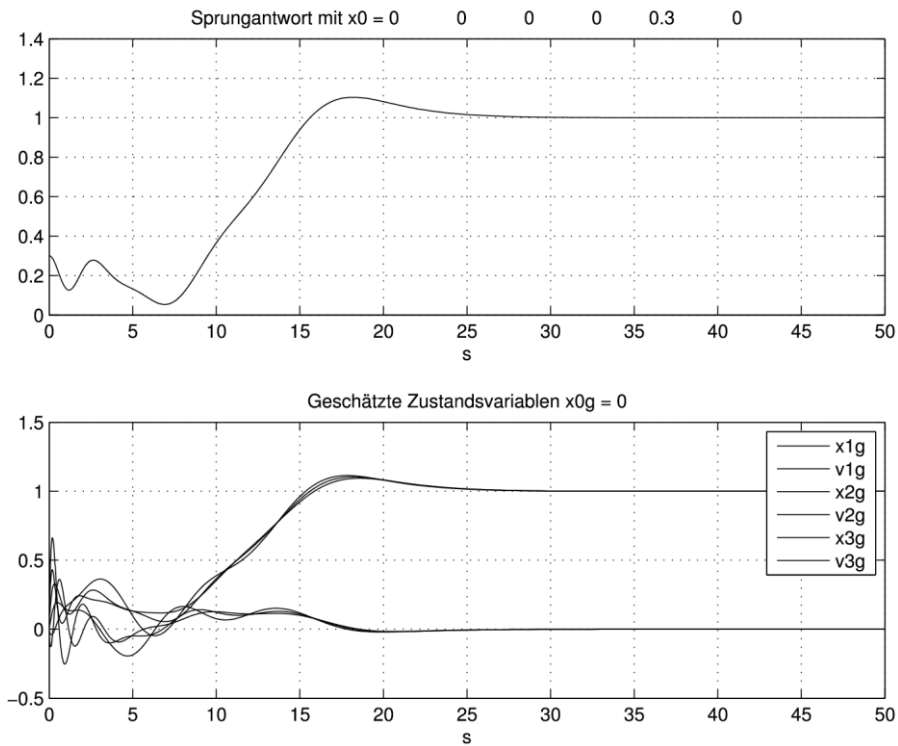

**Abb. 3.68:** Sprungantwort des Servosystems mit  $x(0) \neq 0$  (beobachter\_2.m, beobachter21.mdl)

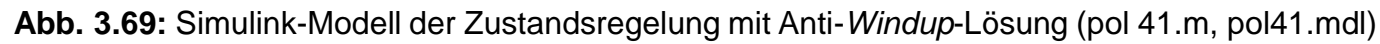

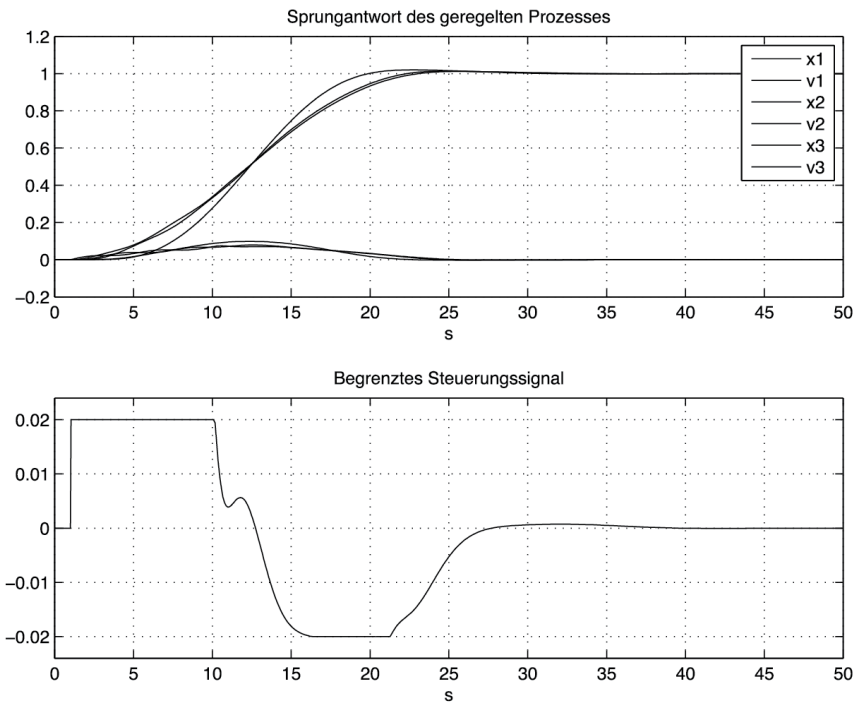

**Abb. 3.70:** Sprungantwort des Servosystems mit Anti-*Windup*-Lösung (pol\_41.m, pol41.mdl)

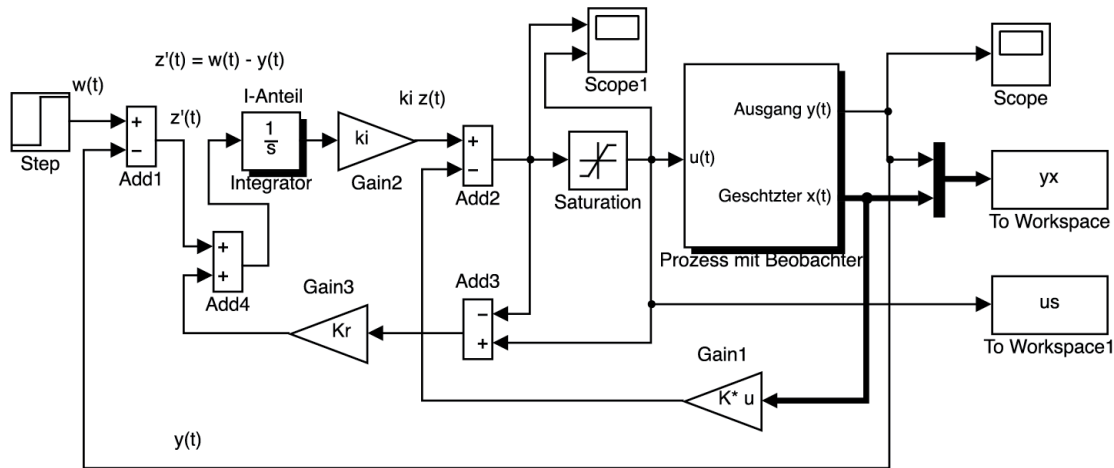

**Abb. 3.71:** Simulink-Modell der Zustandsregelung mit Beobachter und Anti-*Windup*-Lösung (beobachter\_22.m, beobachter22.mdl)



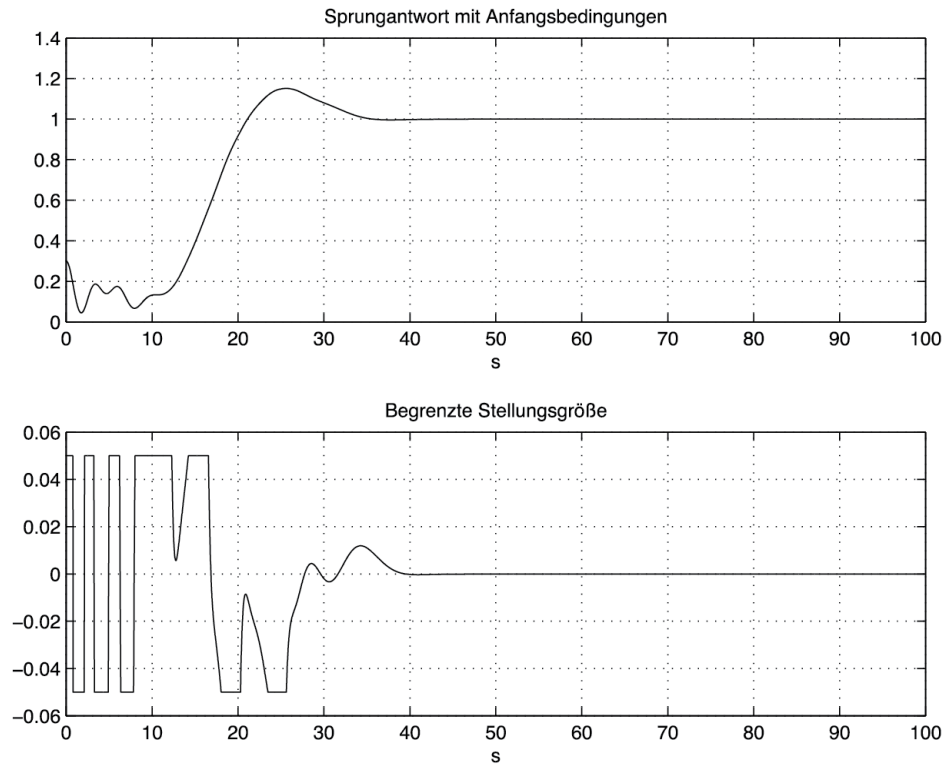

**Abb. 3.72:** Sprungantwort der Zustandsregelung mit Anti-*Windup*-Lösung (beobachter\_22.m, beobachter22.mdl)

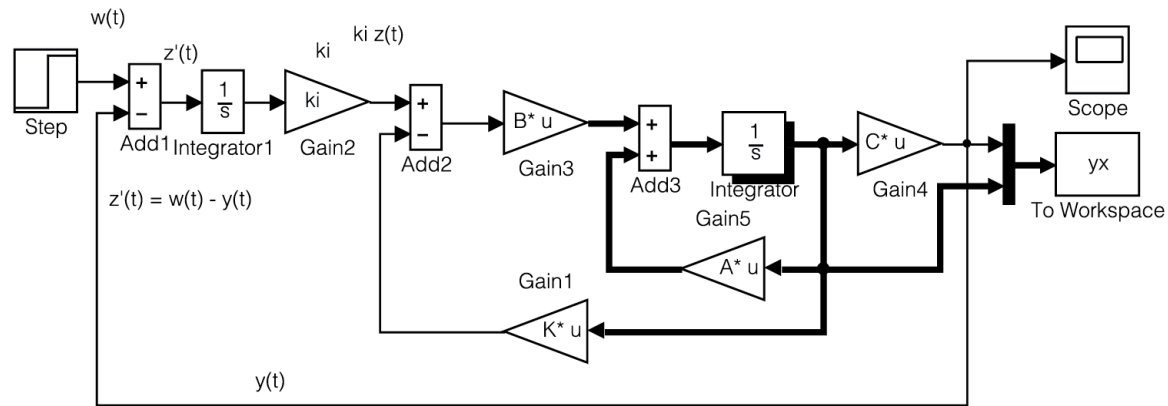

**Abb. 3.73:** Simulink-Modell der LQR-Servoregelung mit I-Wirkung (LQR\_1.m, LQR1.mdl)

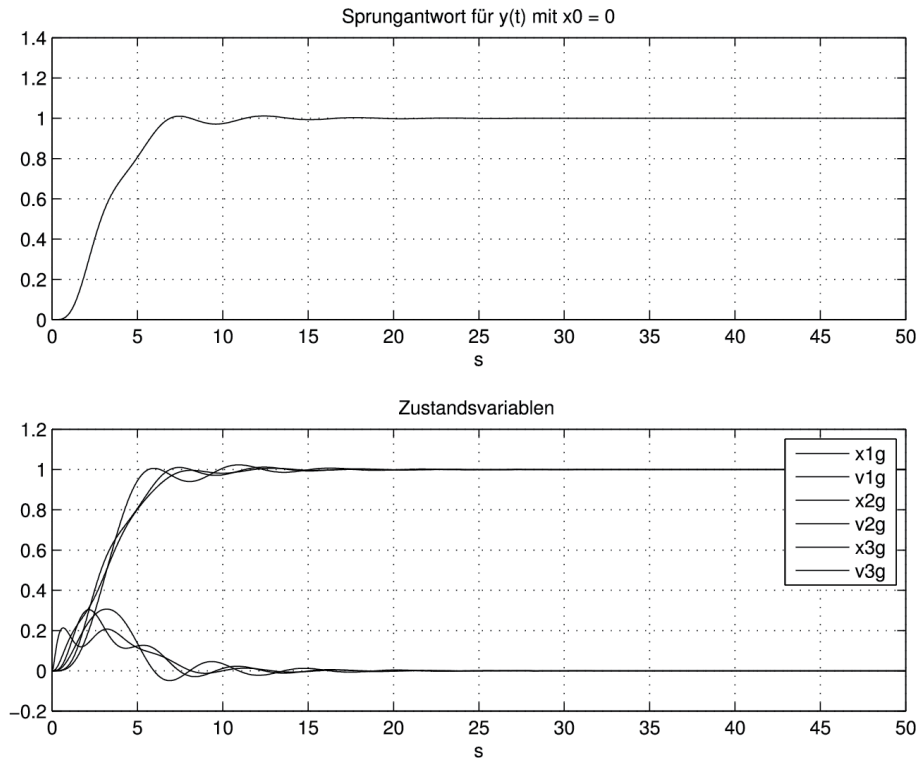

**Abb. 3.74:** Sprungantwort der LQR-Servoregelung und die Zustandsvariablen des Prozesses (LQR\_1.m, LQR1.mdl)



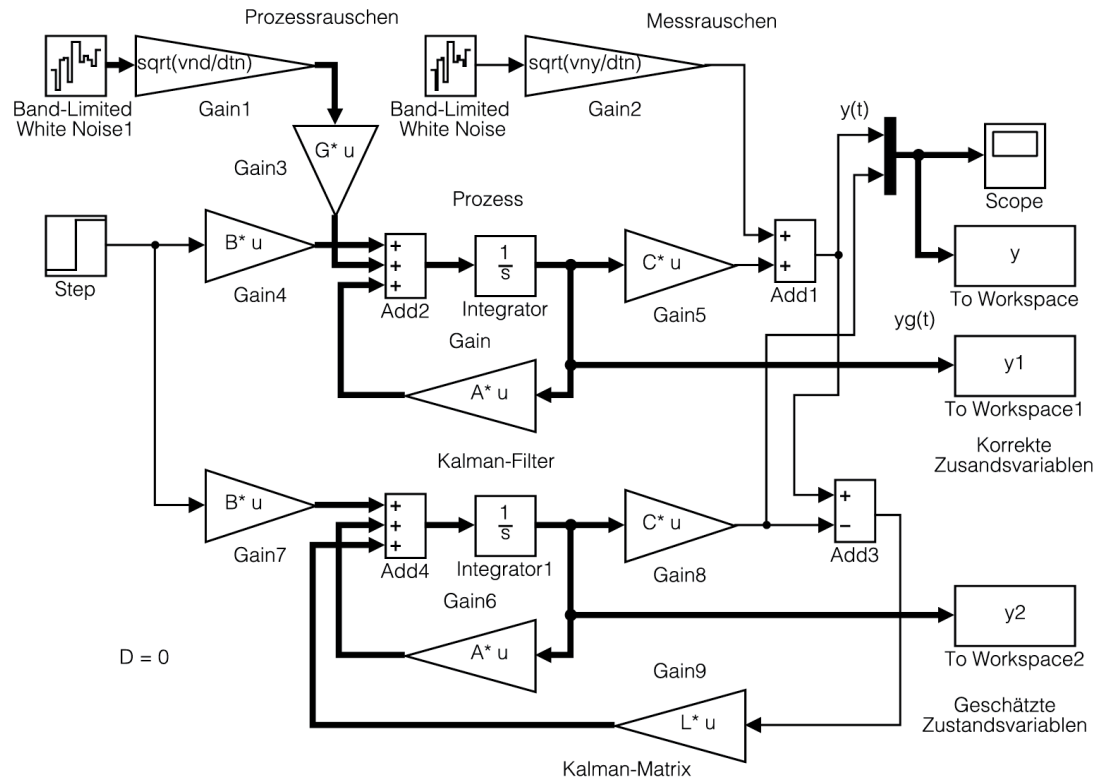

**Abb. 3.76:** Simulink-Modell des Kalman-Filters (kalman\_1.m, kalman1.mdl)

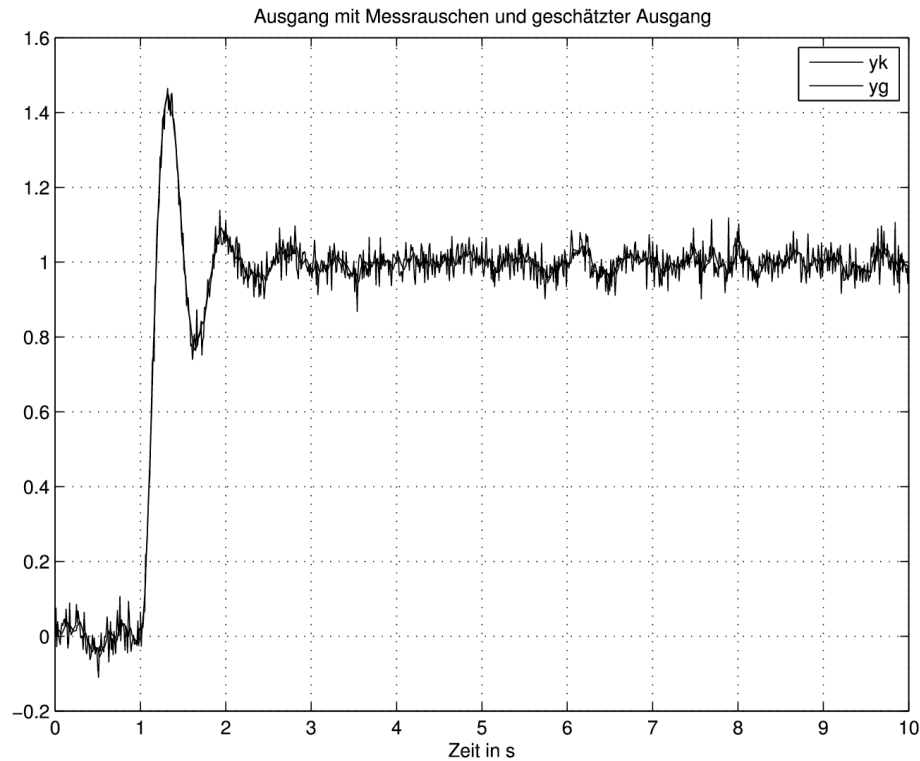

**Abb. 3.77:** Gemessener und geschätzter Ausgang (kalman\_1.m, kalman1.mdl)

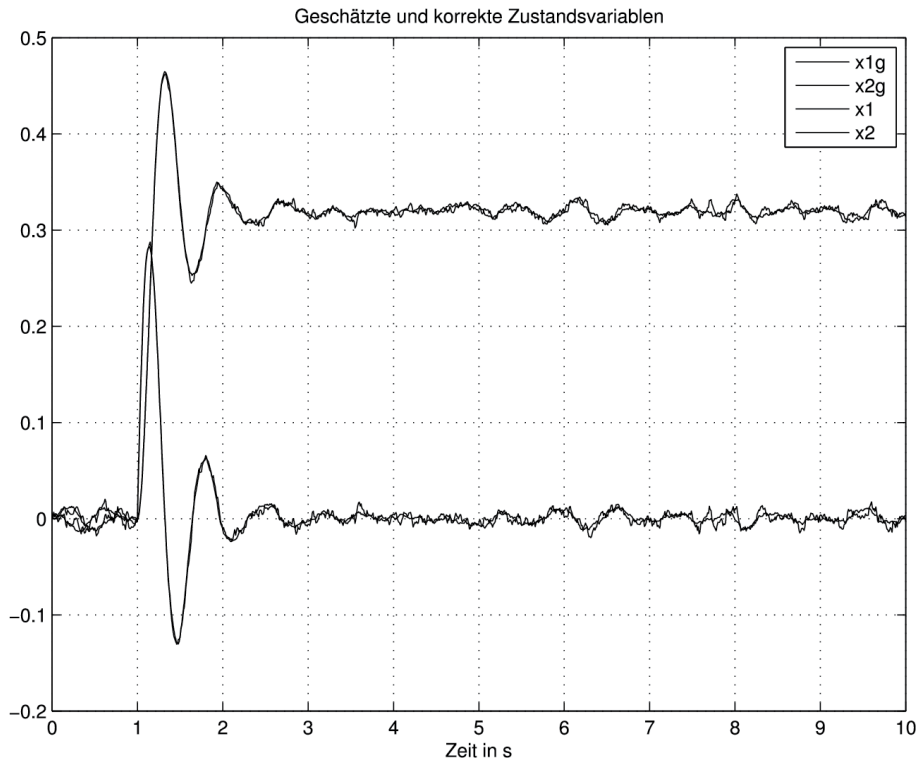

**Abb. 3.78:** Geschätzte und korrekte Zustandsvariablen (kalman\_1.m, kalman1.mdl)

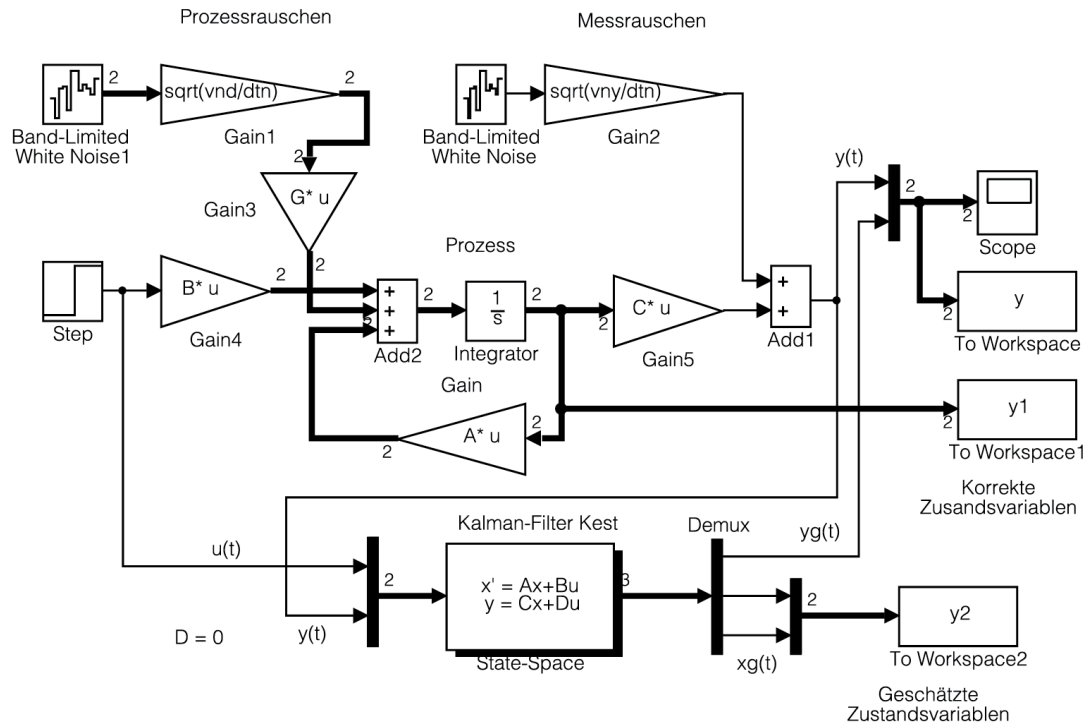

**Abb. 3.79:** Simulink-Modell des Kalman-Filters mit Zustandsmodell Kest in einem *State-Space*-Block implementiert (kalman\_10.m, kalman10.mdl)



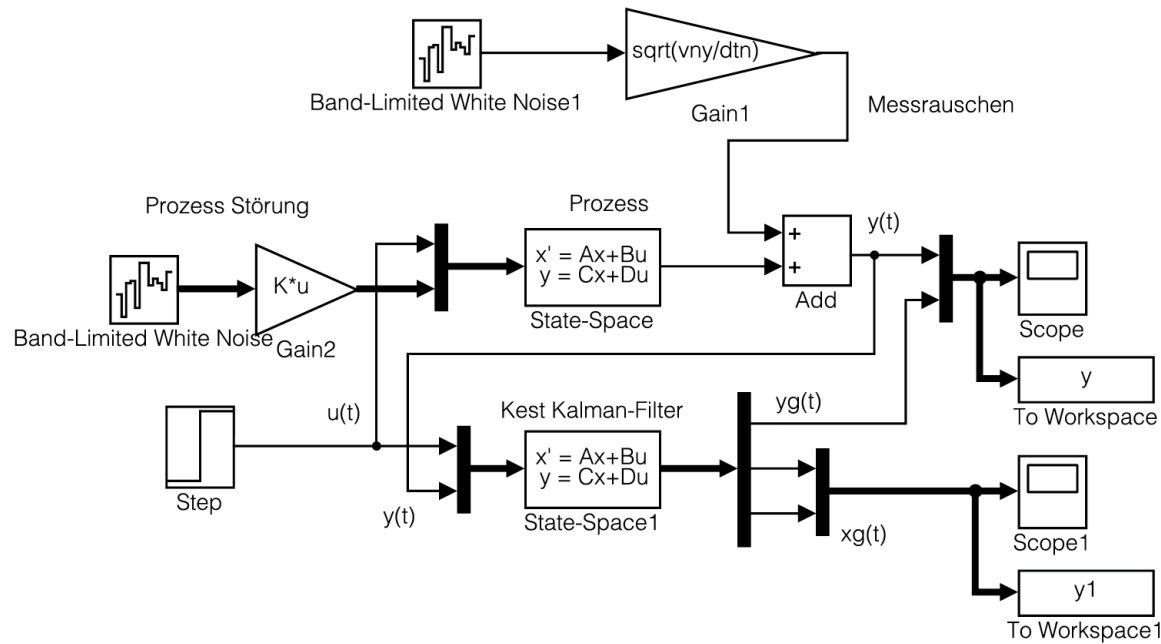

**Abb. 3.80:** Simulink-Modell des Kalman-Filters mit dem Prozess in einem *State-Space*-Block implementiert (kalman\_11.m, kalman11.mdl)

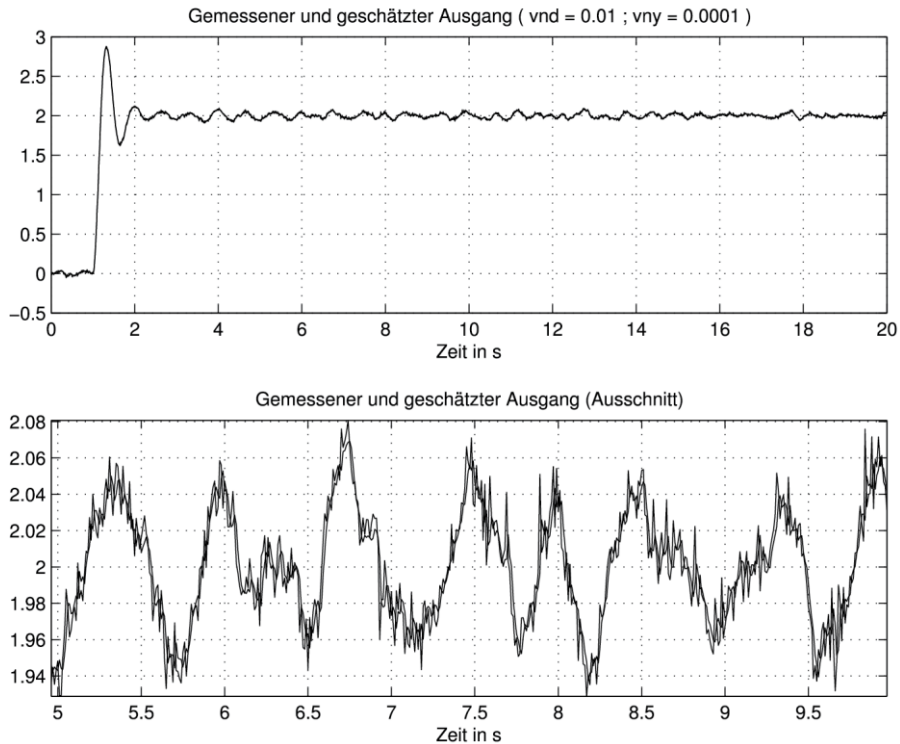

**Abb. 3.81:** a) Der mit Messrauschen überlagerter Ausgang  $y(t)$  und der mit Kalman-Filter geschätzter Ausgang  $\hat{y}(t)$  b) Einen Ausschnitt davon (kalman\_11.m, kalman11.mdl)

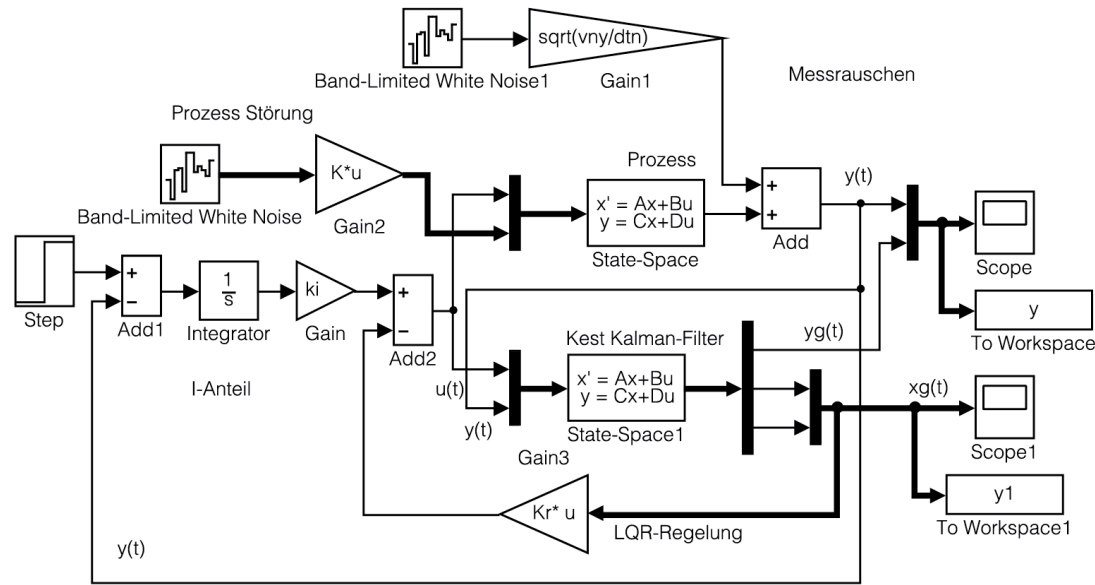

**Abb. 3.82:** Simulink-Modell der LQR-Regelung mit Kalman-Filter für die Schätzung der Zustandsvariablen (kalman\_12.m, kalman12.mdl)

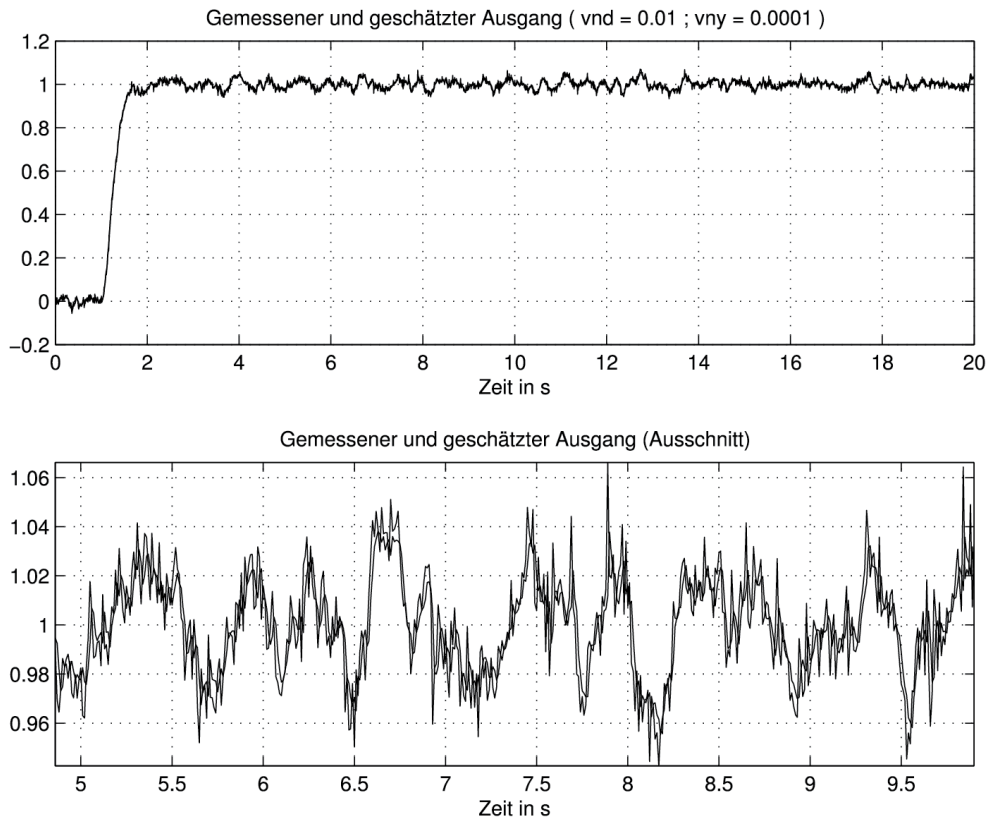

**Abb. 3.83:** a) Der mit Messrauschen überlagerter, geregelter Ausgang  $y(t)$  und der mit Kalman-Filter geschätzter Ausgang  $\hat{y}(t)$  b) Ein Ausschnitt davon (kalman\_12.m, kalman12.mdl)

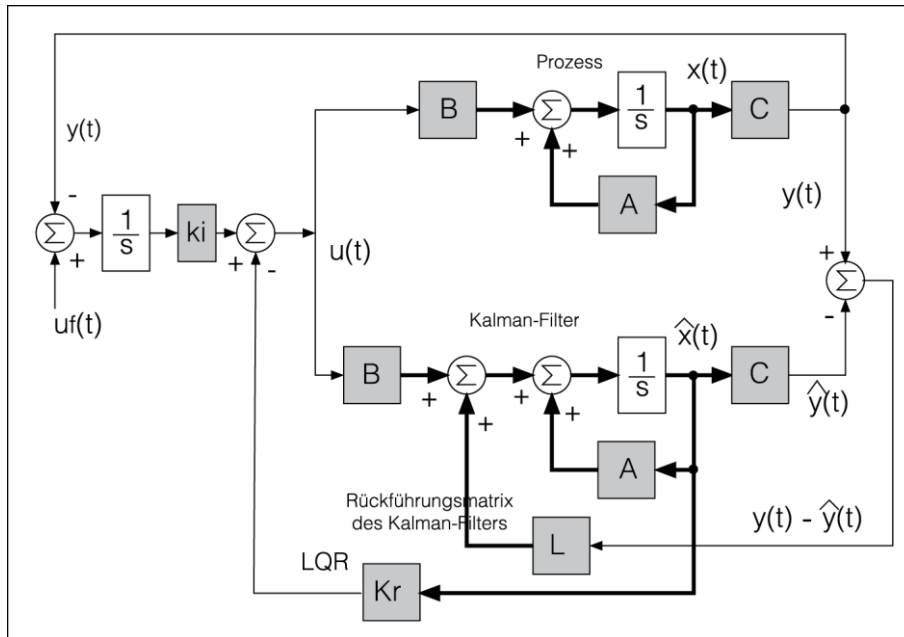

**Abb. 3.84:** Struktur des Systems ohne Prozess-Störung und ohne Messrauschen

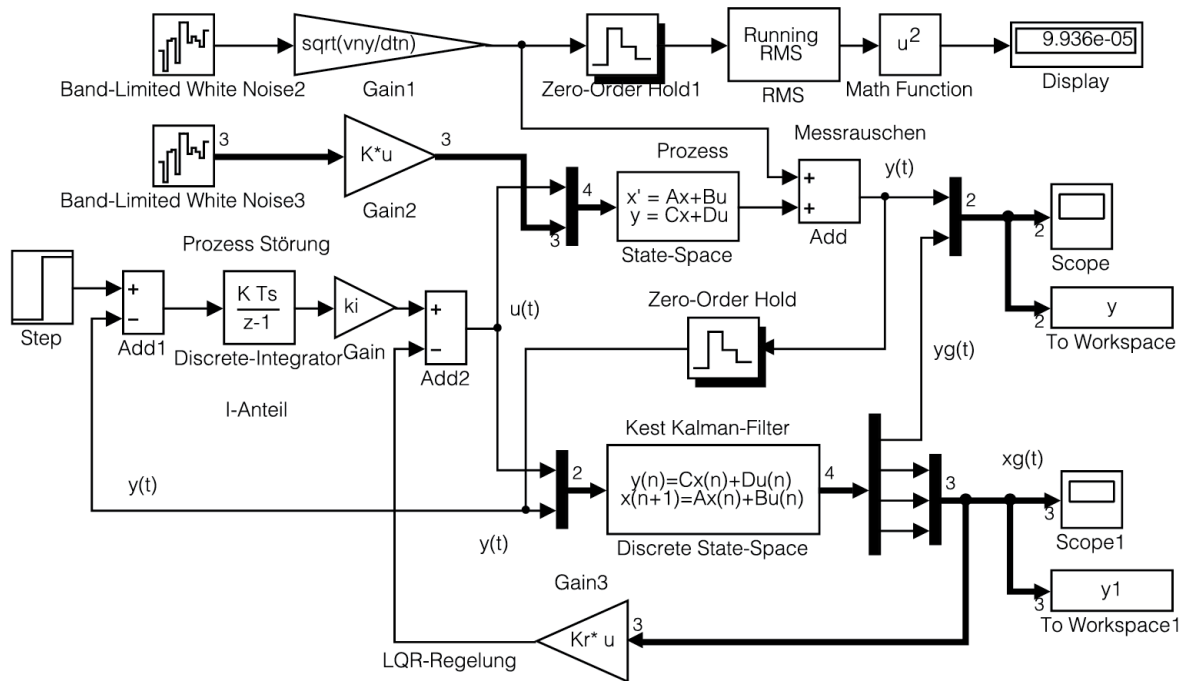

**Abb. 3.85:** Simulink-Modell der LQR-Regelung mit zeitdiskretem Kalman-Filter (kalman\_1d.m, kalman1d.mdl)

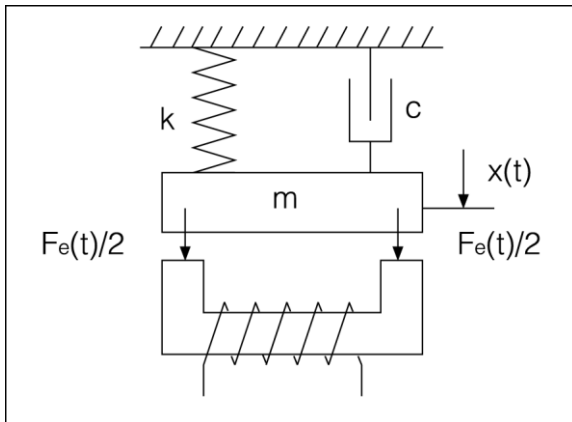

**Abb. 3.86:** Einfaches Feder-Masse-System

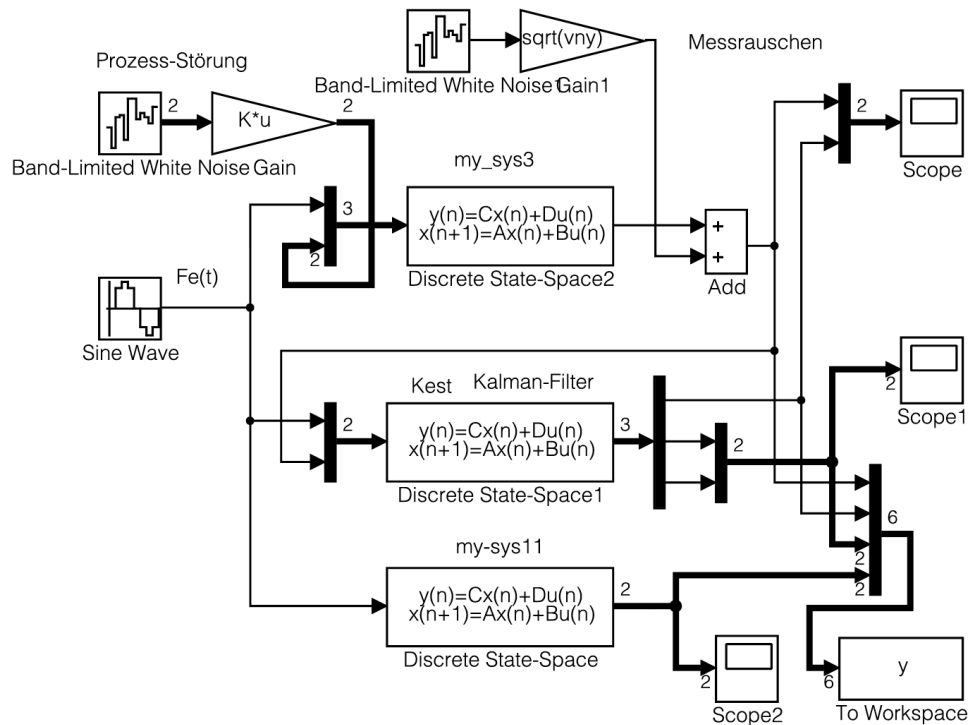

**Abb. 3.87:** Simulink-Modell der Schätzung der Zustandsvariablen aus der Beschleunigung (kalman\_2d.m, kalman2d.mdl)



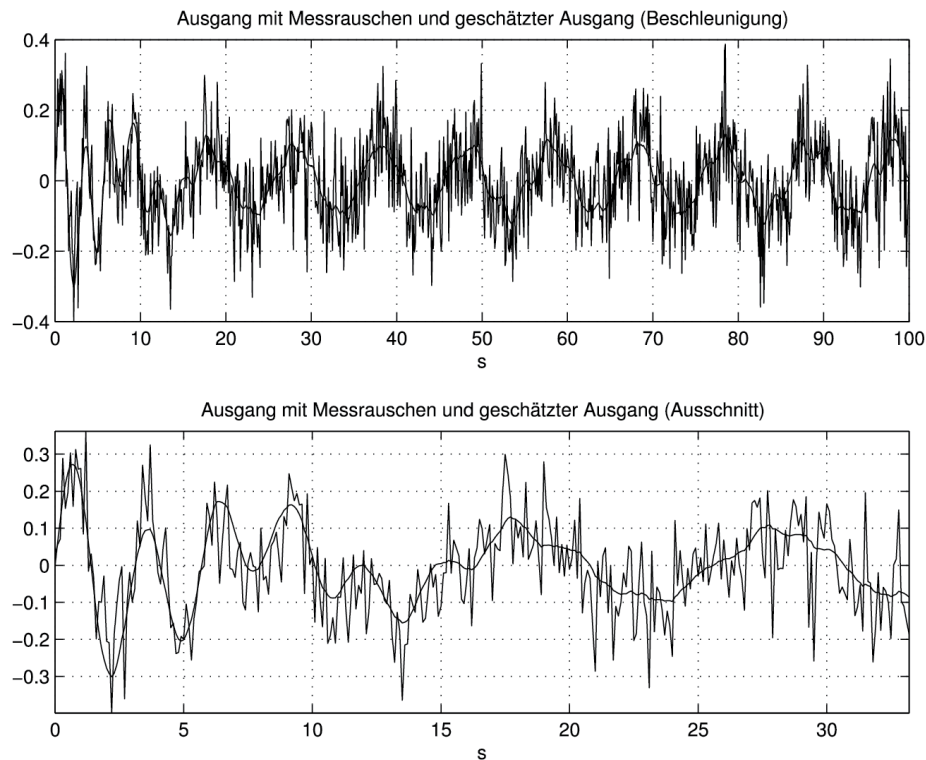

**Abb. 3.88:** Ausgang mit Messrauschen und geschätzter Ausgang (Beschleunigung) (kalman\_2d.m, kalman2d.mdl)

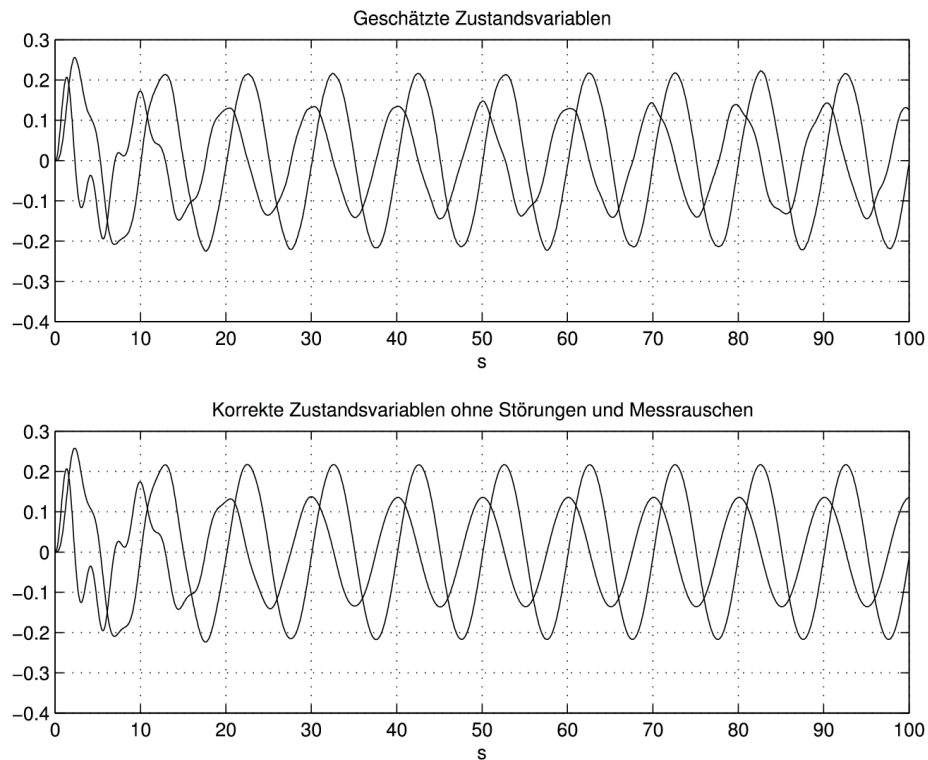

**Abb. 3.89:** a) Geschätzte Zustandsvariablen des Prozesses b) Korrekte Zustandsvariablen (kalman\_2d.m, kalman2d.mdl)

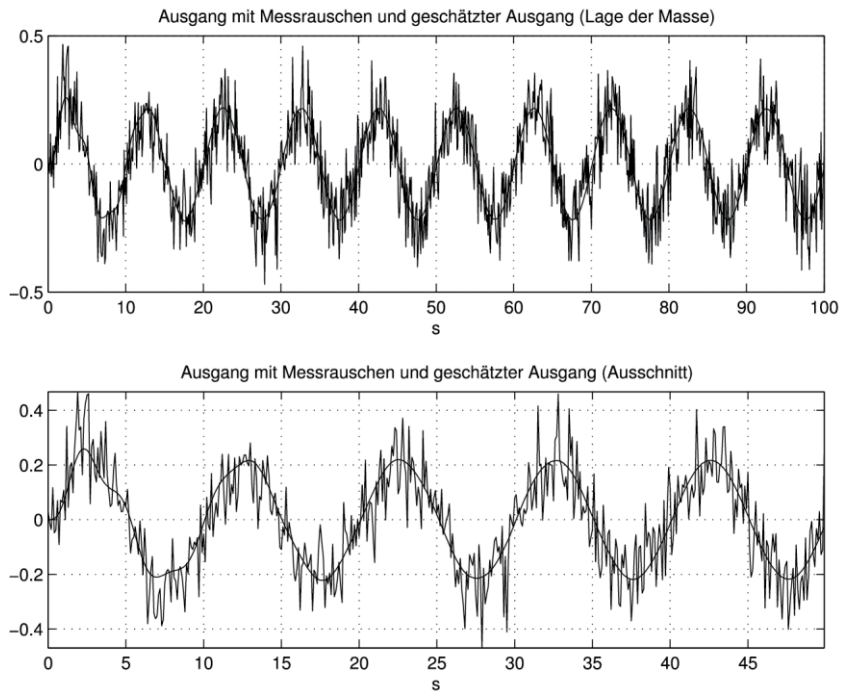

**Abb. 3.90:** Ausgang mit Messrauschen und geschätzter Ausgang (Lage der Masse) (kalman\_3d.m, kalman3d.mdl)

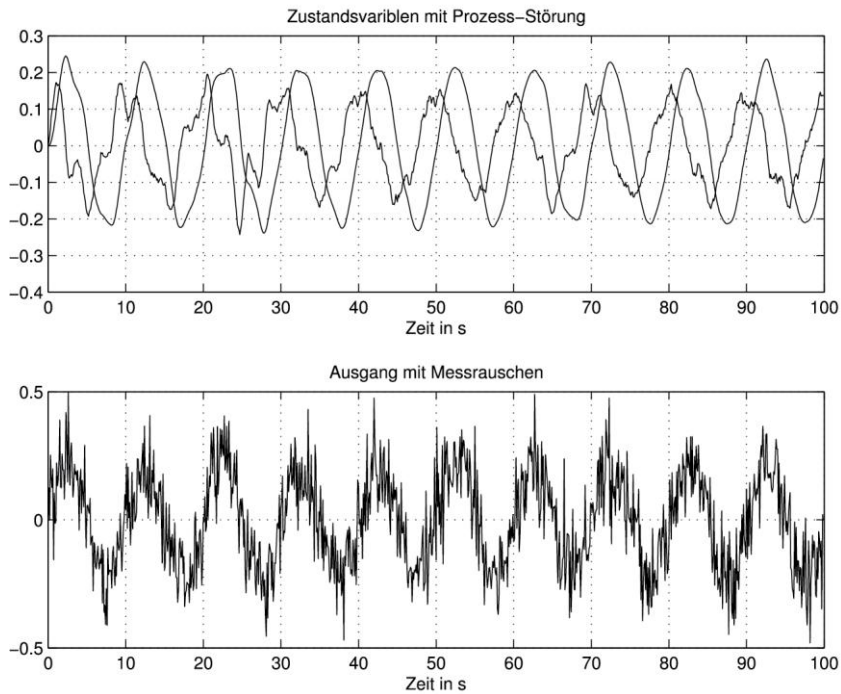

**Abb. 3.91:** Zustandsvariablen mit Prozess-Störung und Ausgang mit Messrauschen (Lage der Masse) für  $v_{nd}=0,01$  und  $v_{ny}=0,01$  (kalman\_4d.m, kalman4d.mdl)

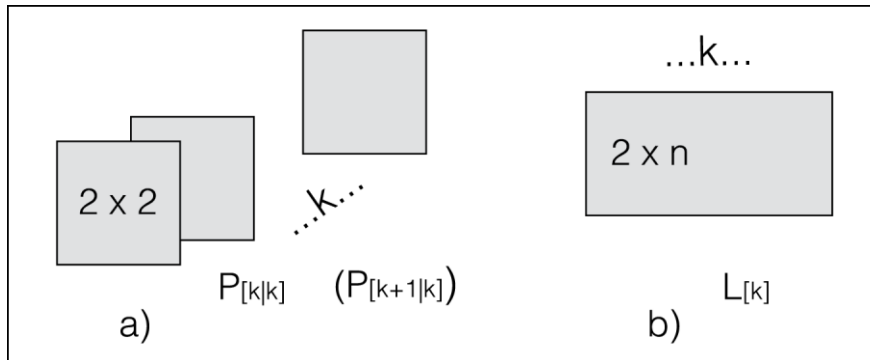

**Abb. 3.92:** Mehrdimensionales Feld für die Zwischenspeicherung der Kovarianzmatrizen  $P_{[k|k]}$  und  $P_{[k+1|k]}$  der Schätzfehler und für die Matrix  $L_{[k]}$  (kalman\_4d.m, kalman4d.mdl)

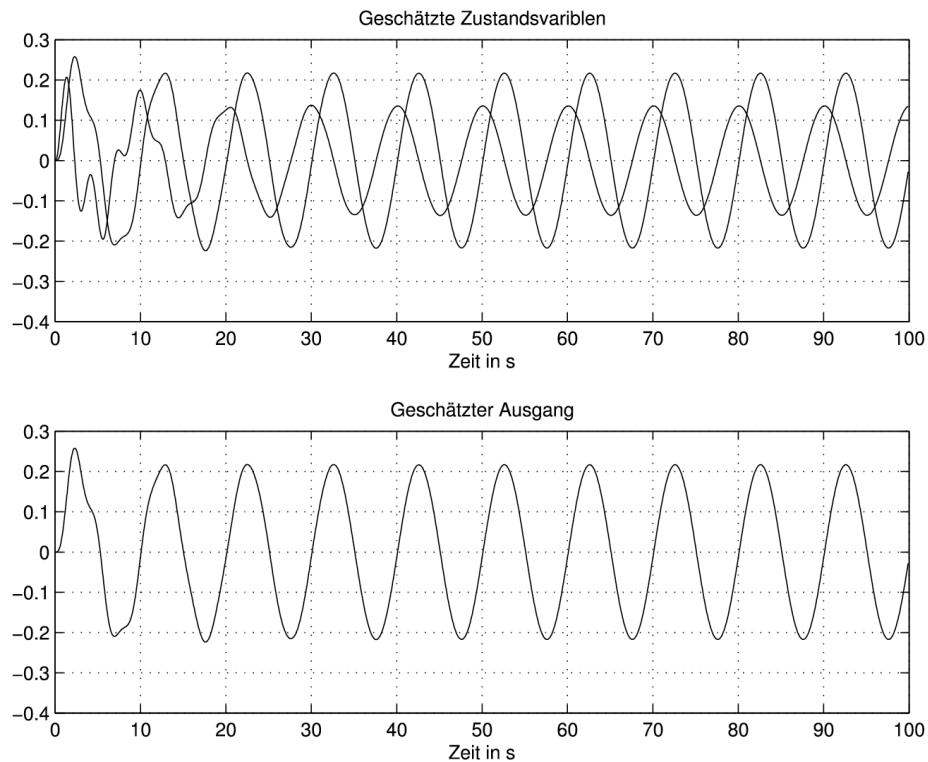

**Abb. 3.93:** Geschätzte Zustandsvariablen und geschätzter Ausgang für  $v_{nd}=0,01$  und  $v_{ny}=0,01$  (kalman\_4d.m, kalman4d.mdl)
